# Supplementary material for: Novel exocyclic enamides: synthesis and evaluation of the fungicidal activities of 5-methylene-2-(trifluoromethyl)morpholin-3-one derivatives
Source: Royal Society of Chemistry journal article supplement (doi:10.1039/c5ra20138a), 2015-01-01
Supplement: c5ra20138a1.pdf [file c5ra20138a1.pdf]

# **Novel exocyclic enamides: synthesis and evaluation of fungicidal activities of 5-methylene-2-(trifluoromethyl)morpholin-3-one derivatives**

**Can Cui, Cong Zhu, Lei Tian, Hui-Hui Yang, Jian-Qiang, Wei-Guang Zhao\***

State Key Laboratory of Elemento-Organic Chemistry, Collaborative Innovation Center of Chemical Science and Engineering, Nankai University, Tianjin 300071, China. E-mail: [zwg@nankai.edu.cn](mailto:zwg@nankai.edu.cn).

## **Table of contents**

|                                                                          |         |
|--------------------------------------------------------------------------|---------|
| Copies of $^1\text{H}$ , $^{13}\text{C}$ NMR and HRMS of compounds ..... | S1-S41  |
| Single crystal data of compound 3a.....                                  | S42-S49 |
| Single crystal data of compound 2a.....                                  | S50-S62 |

2a

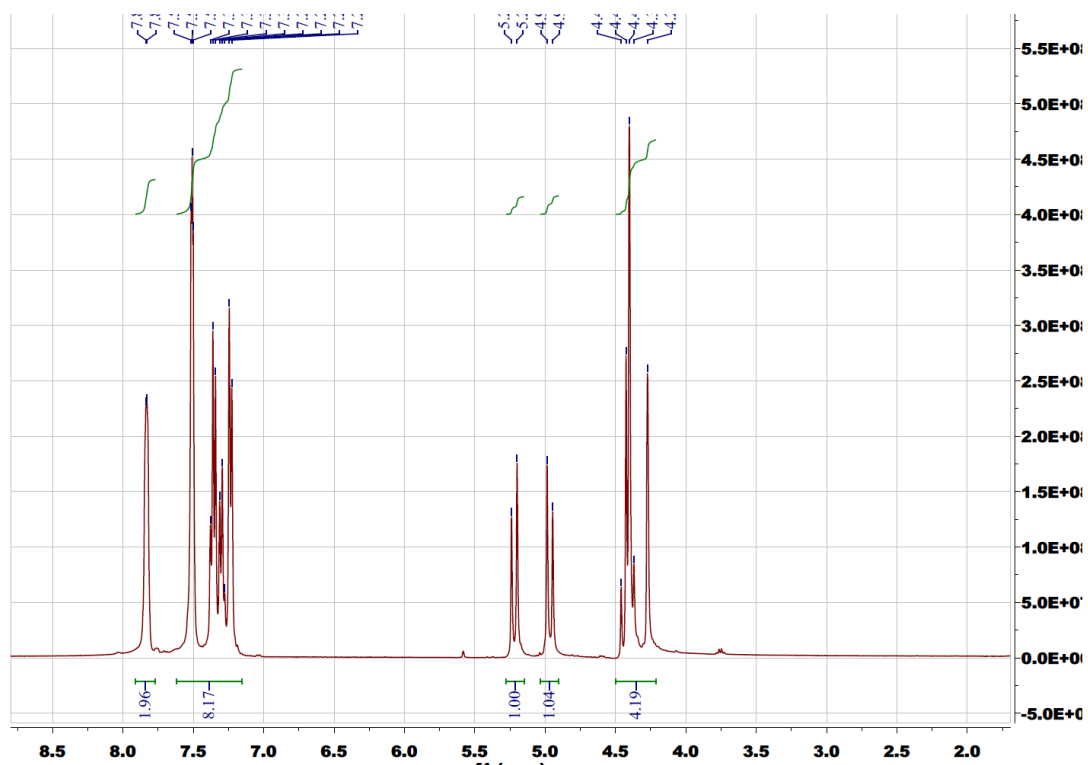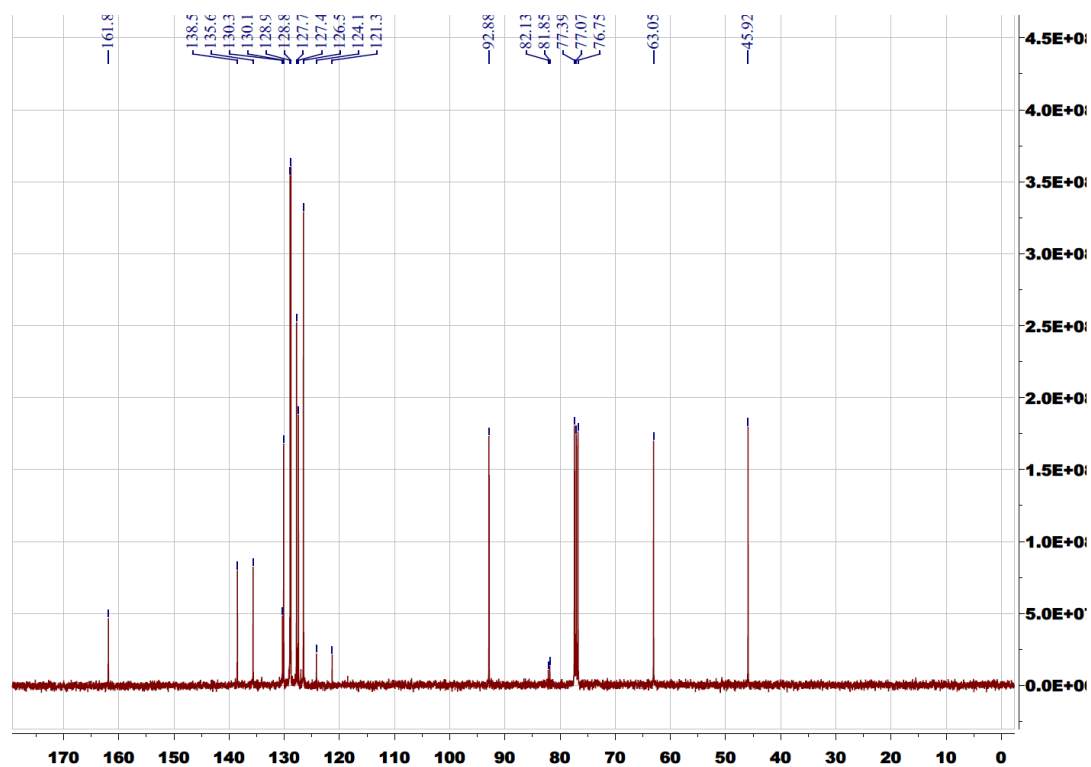

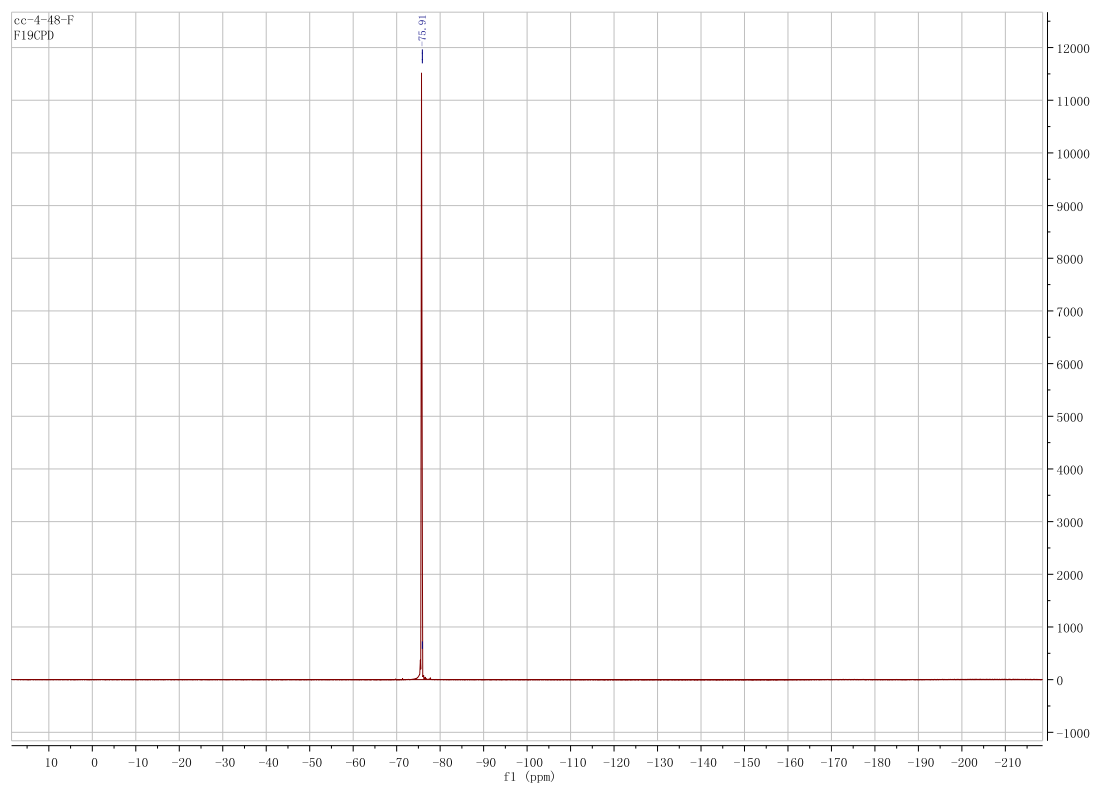

Varian QFT-ESI  
File: cc-4-48\_ESI.trans

Mode: Positive  
Scans: 1

Date: 06-MAR-2012  
Time: 11:05:23  
Scale: 10.0894

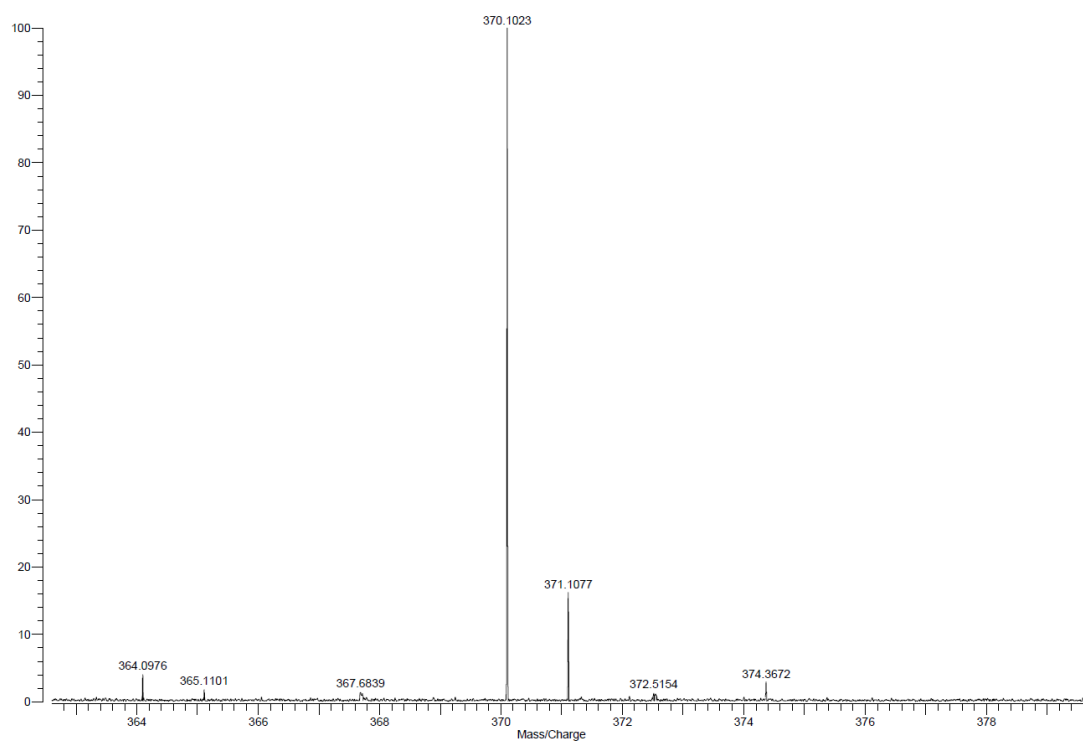

2b

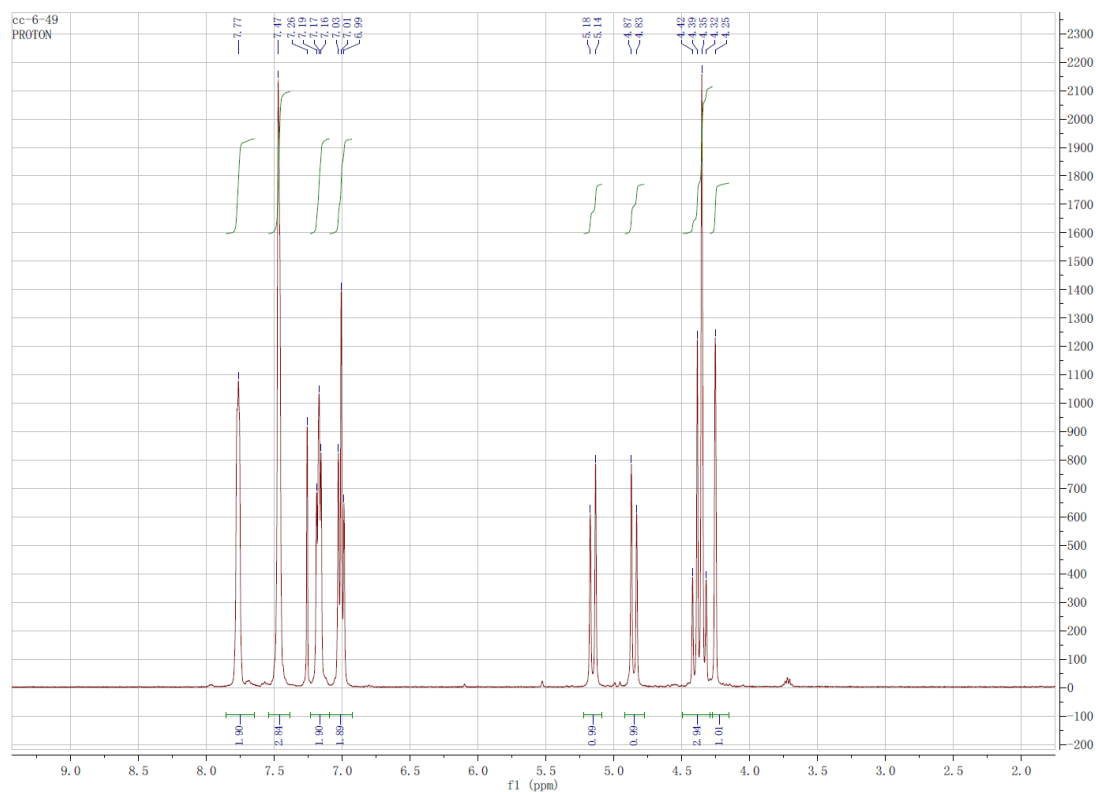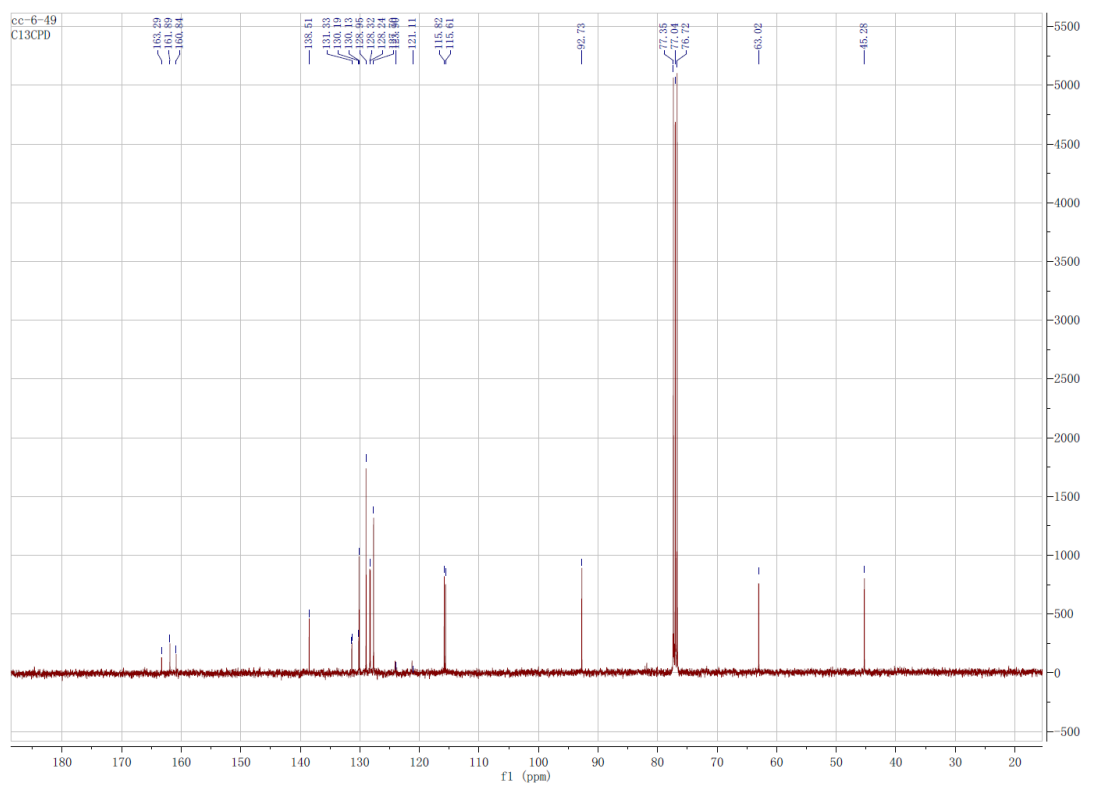

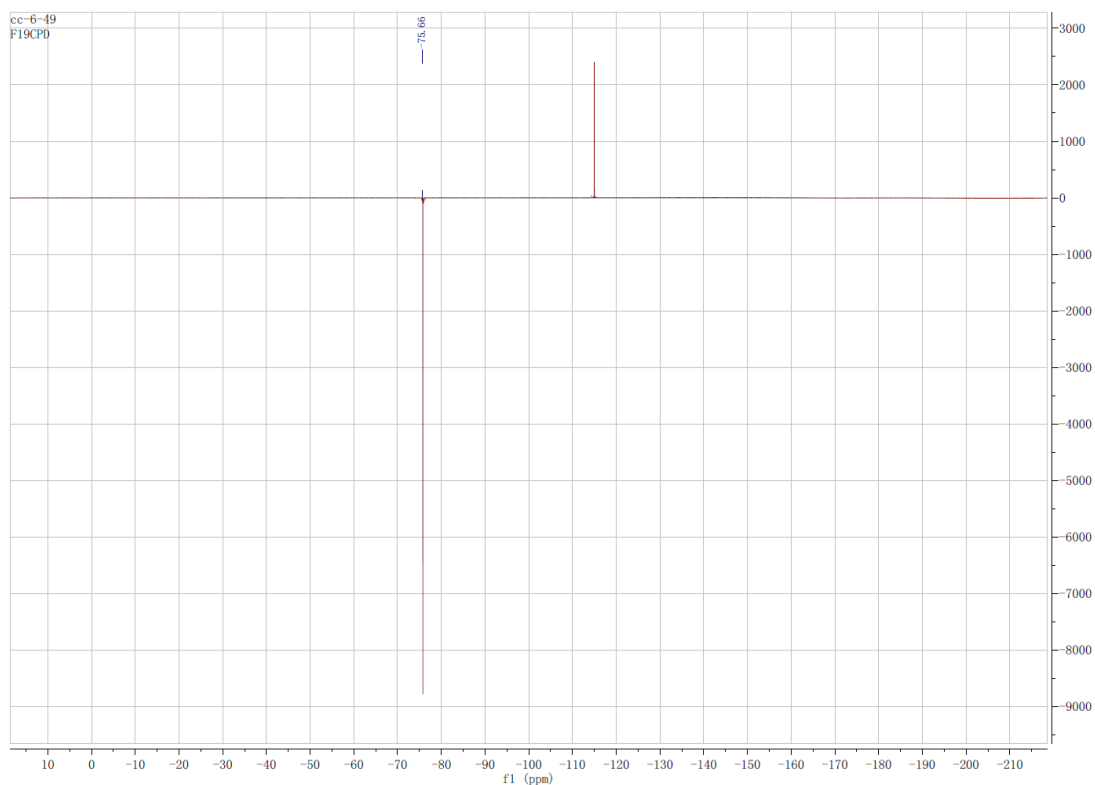

Varian QFT-ESI  
File: cc-6-49\_ESI.trans

Mode: Positive  
Scans: 1

Date: 06-MAR-2012  
Time: 11:24:37  
Scale: 5.8775

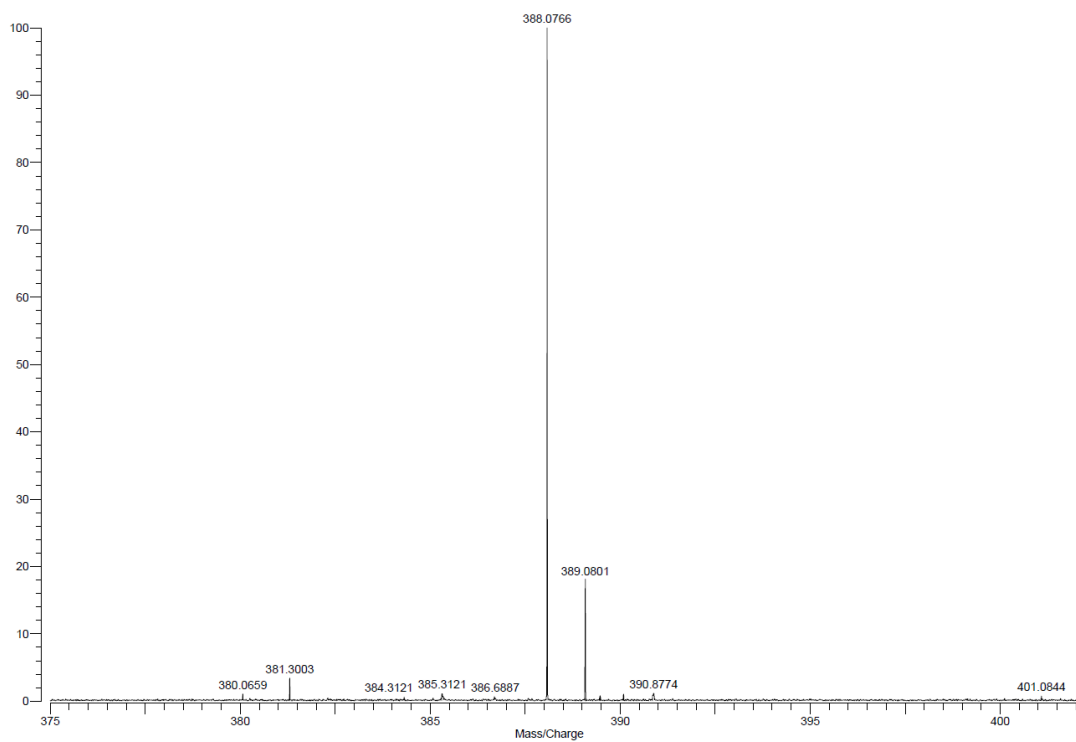

2c

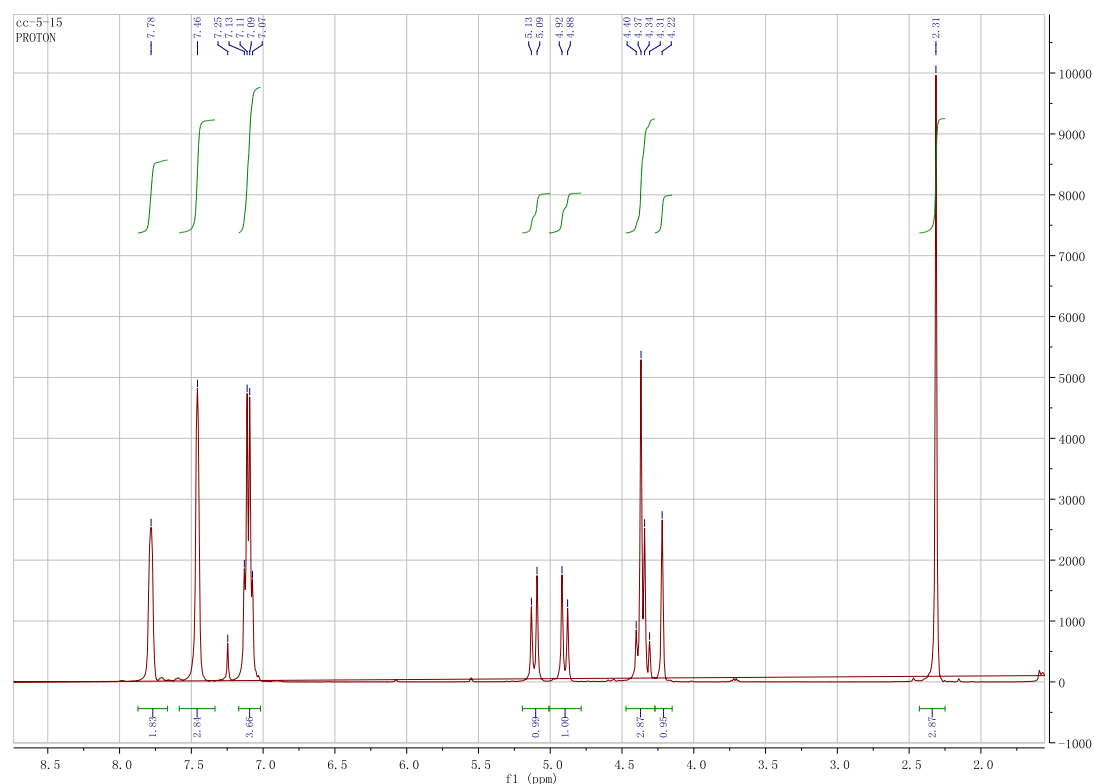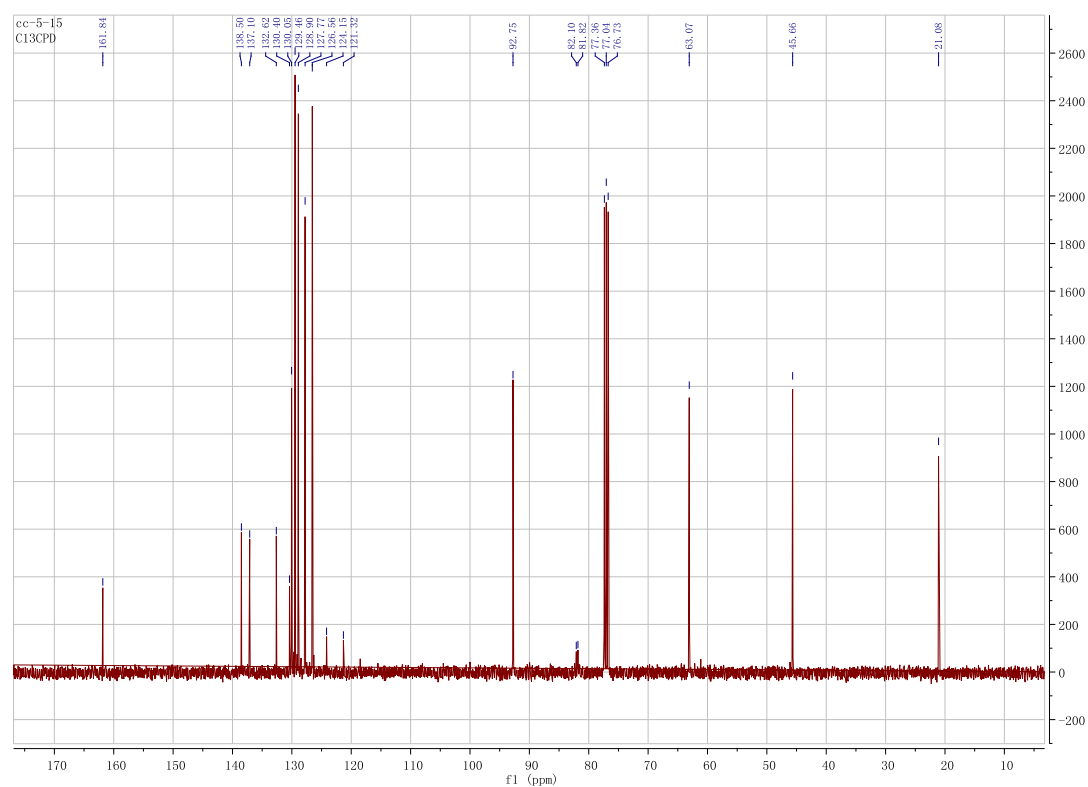

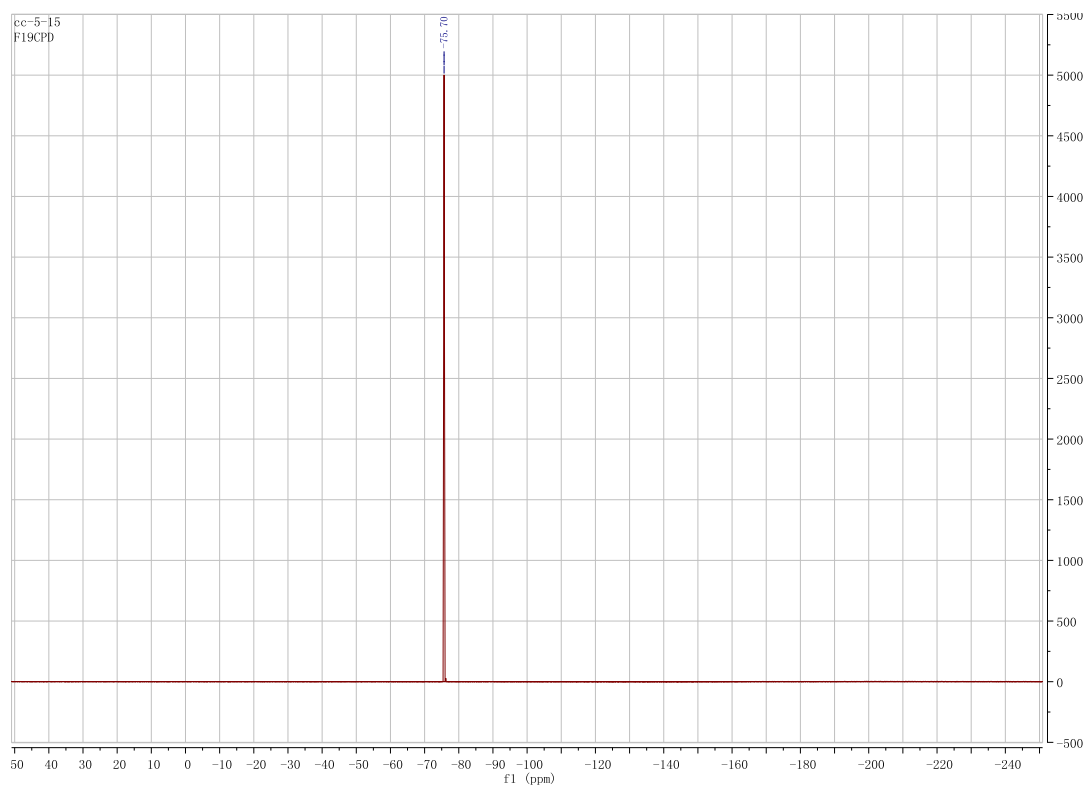

Varian QFT-ESI  
File: cc-5-15\_ESI.trans

Mode: Positive  
Scans: 1  
Date: 06-MAR-2012  
Time: 11:15:10  
Scale: 5.3142

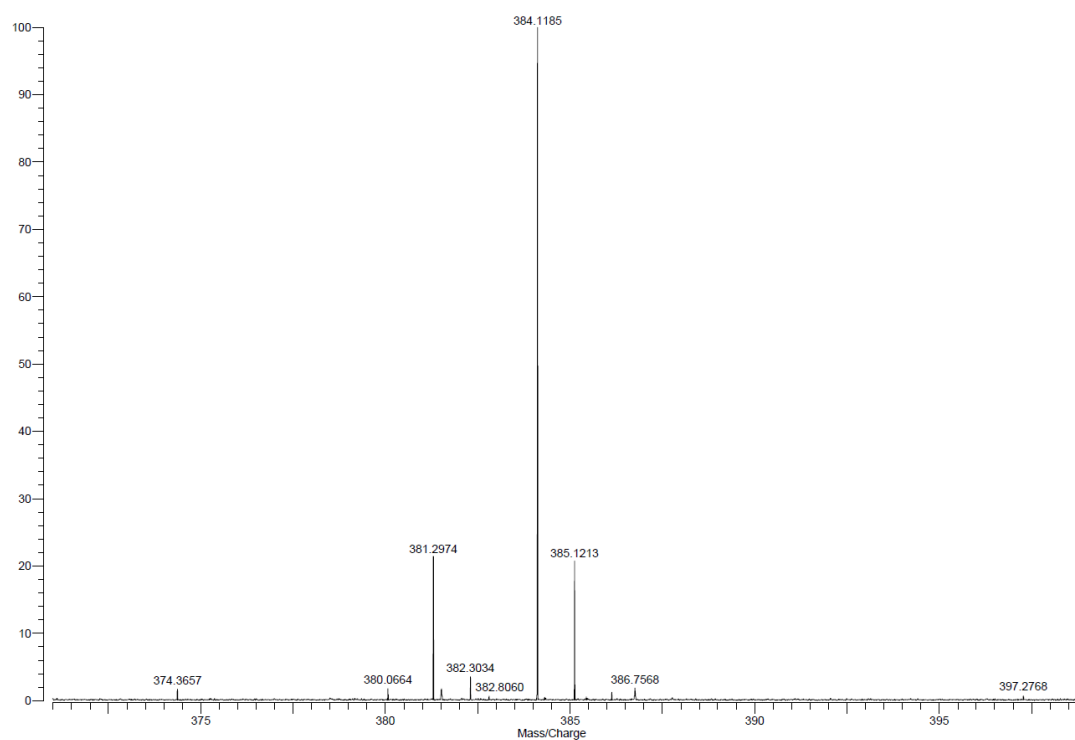

2d

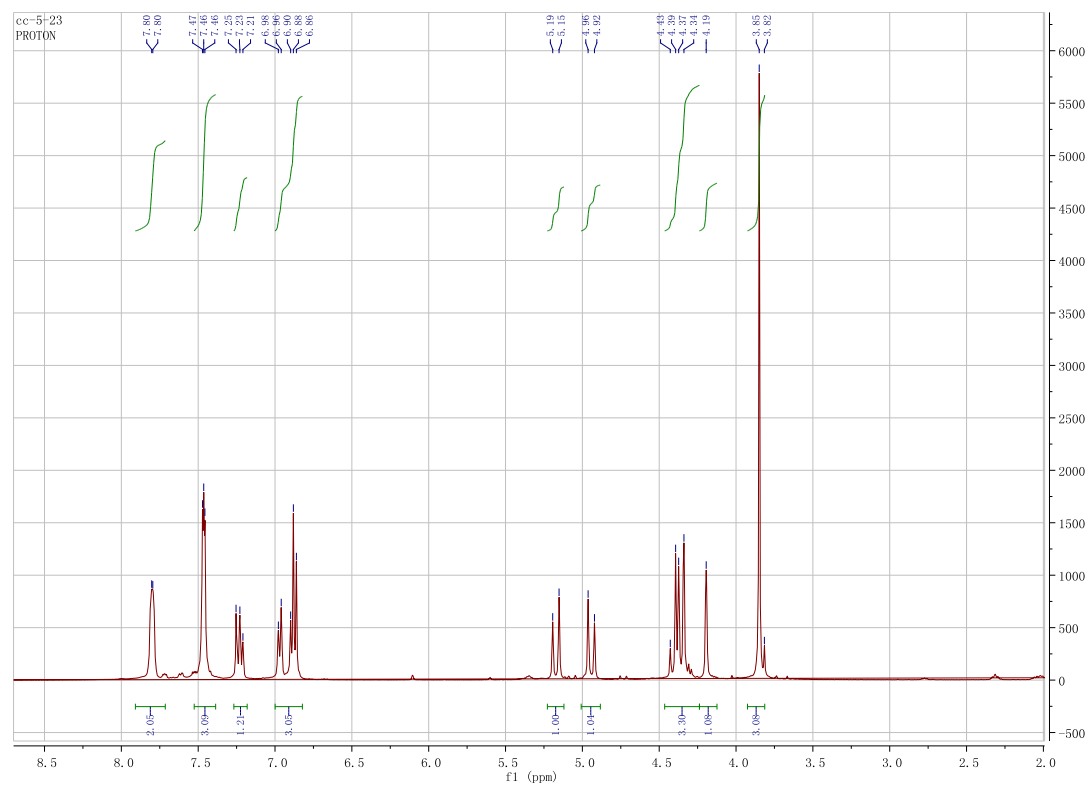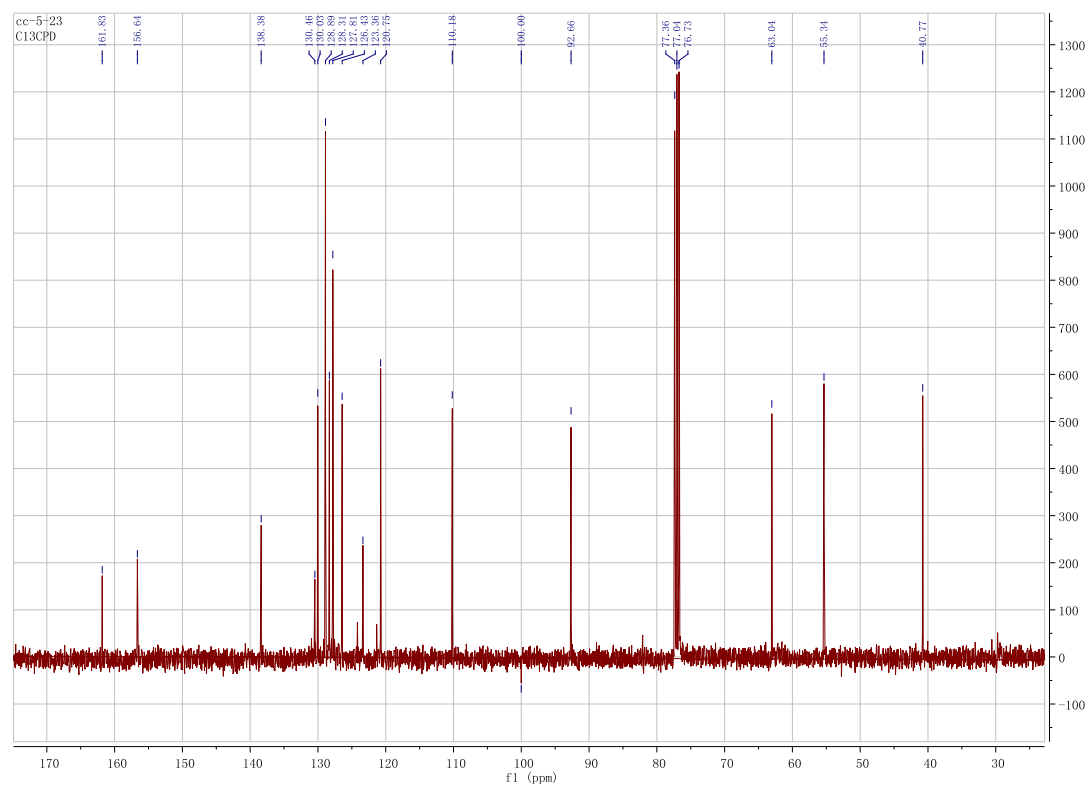



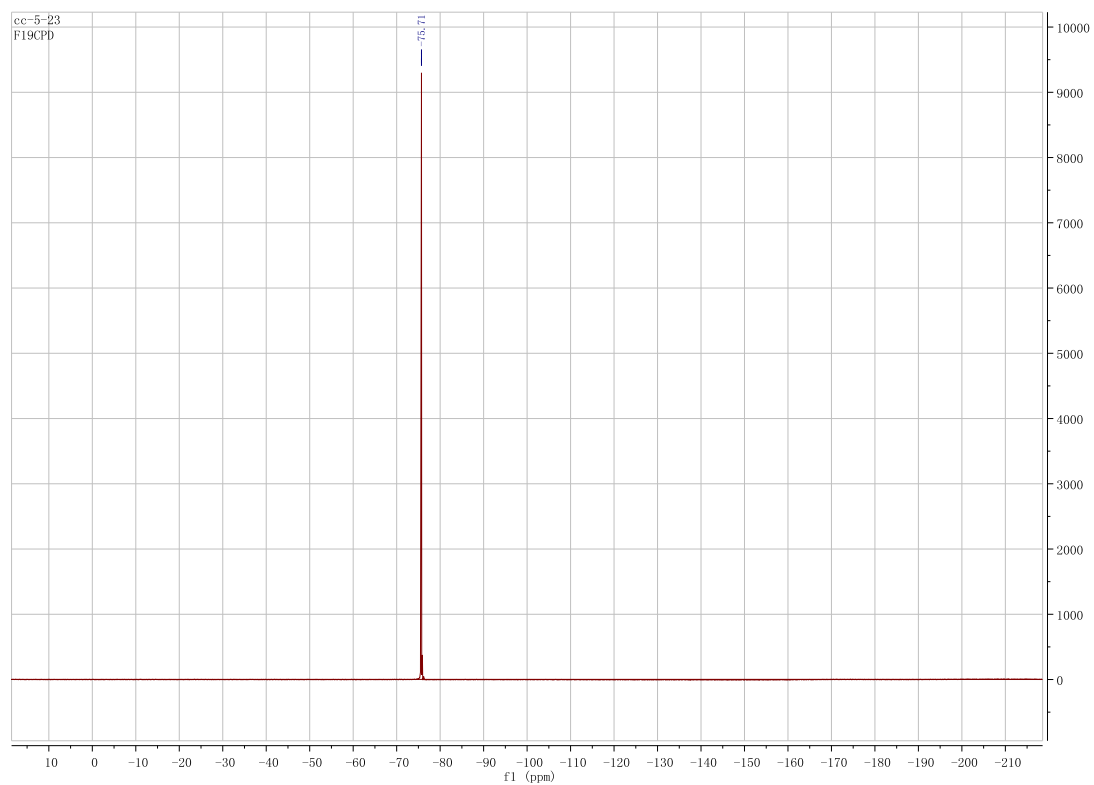

Varian QFT-ESI  
File: cc-5-23\_ESI.trans

Mode: Positive  
Scans: 1

Date: 06-MAR-2012  
Time: 11:16:58  
Scale: 3.9793

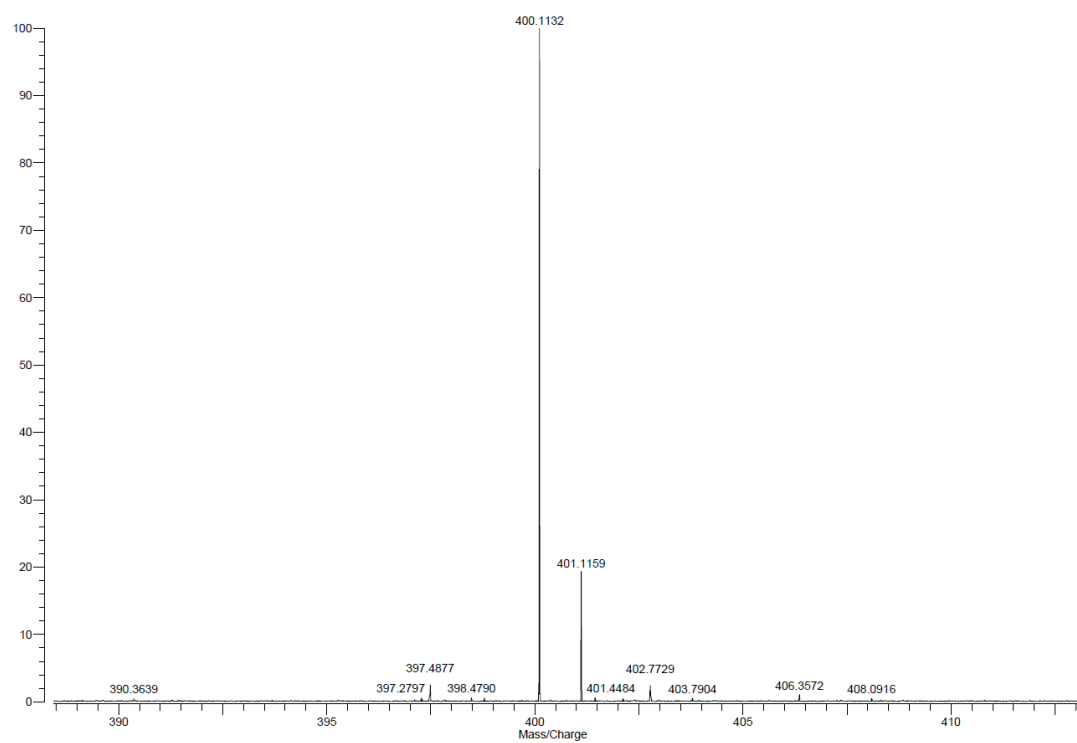

2e

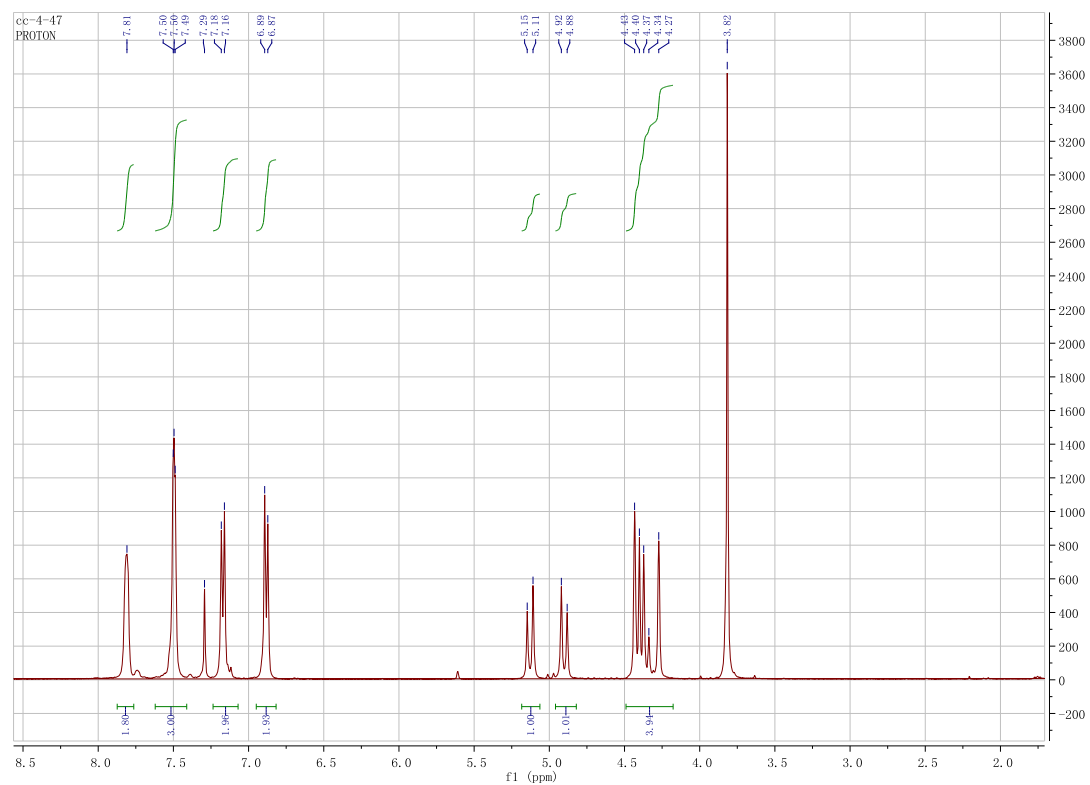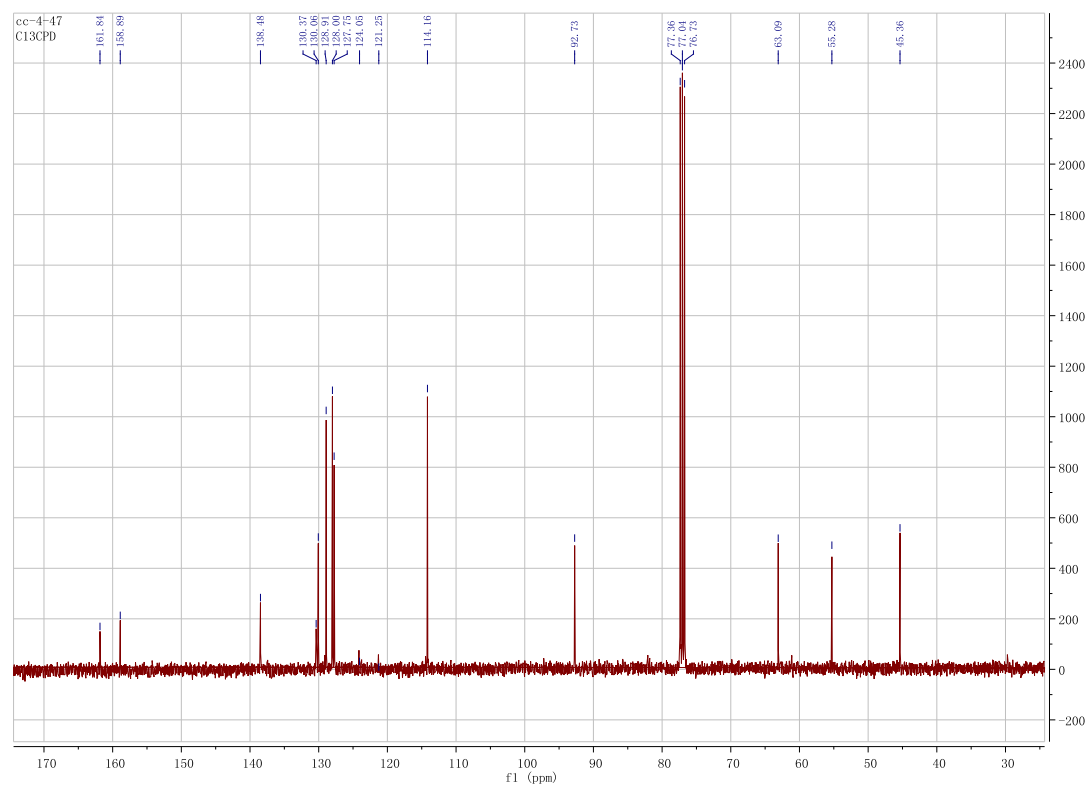

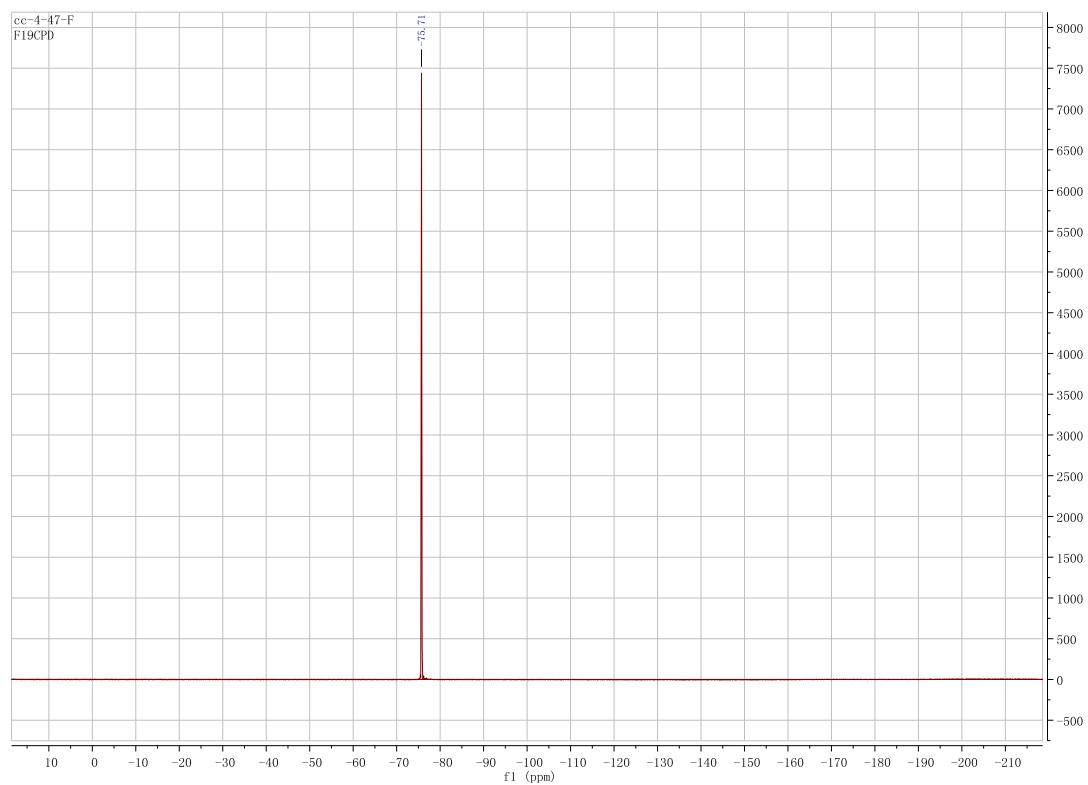

Varian QFT-ESI  
File: cc-4-47\_ESI.trans

Mode: Positive  
Scans: 1

Date: 06-MAR-2012  
Time: 11:38:52  
Scale: 3.8492

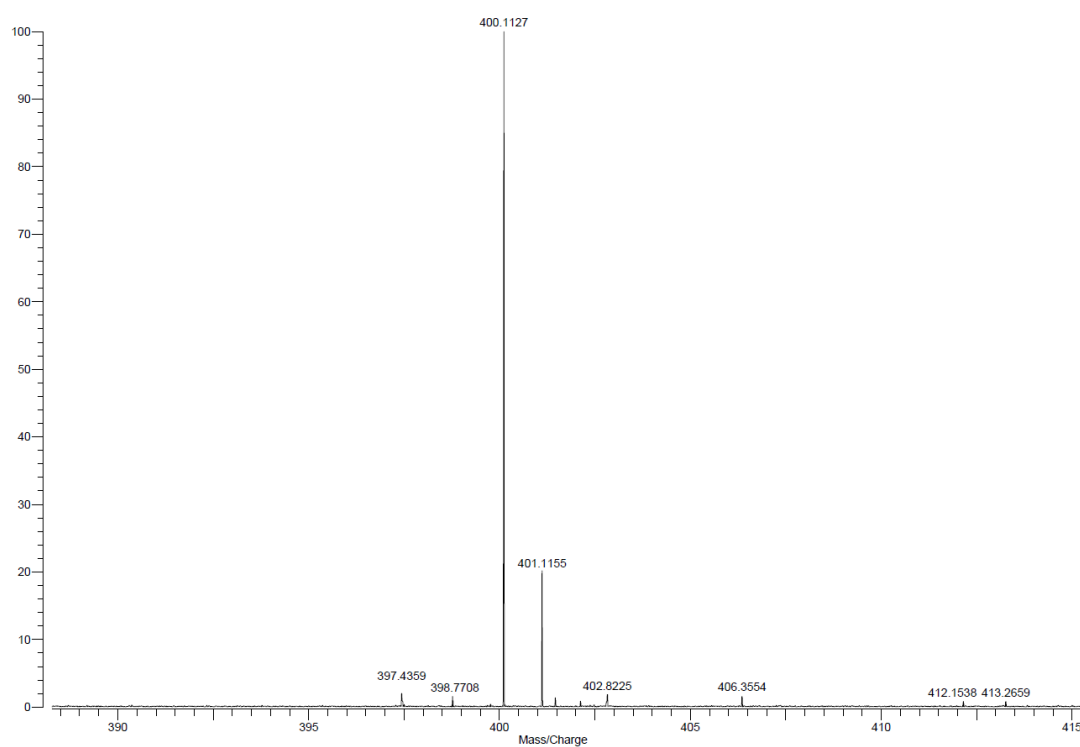

2f

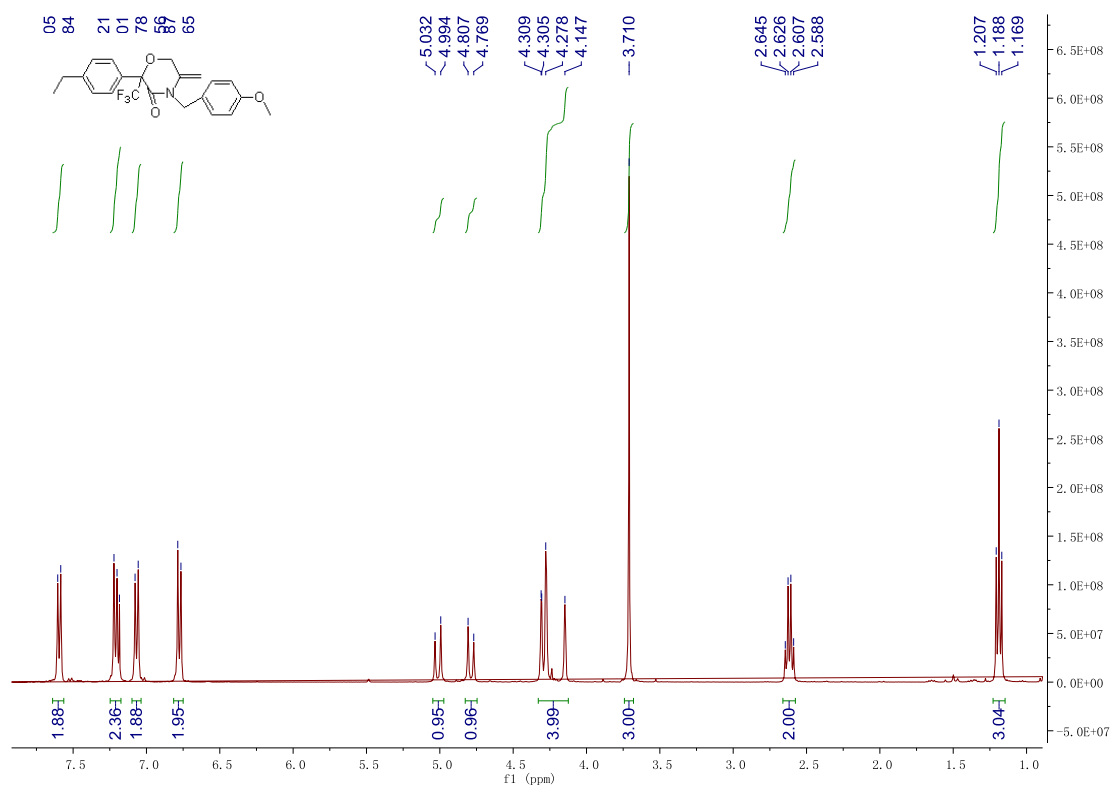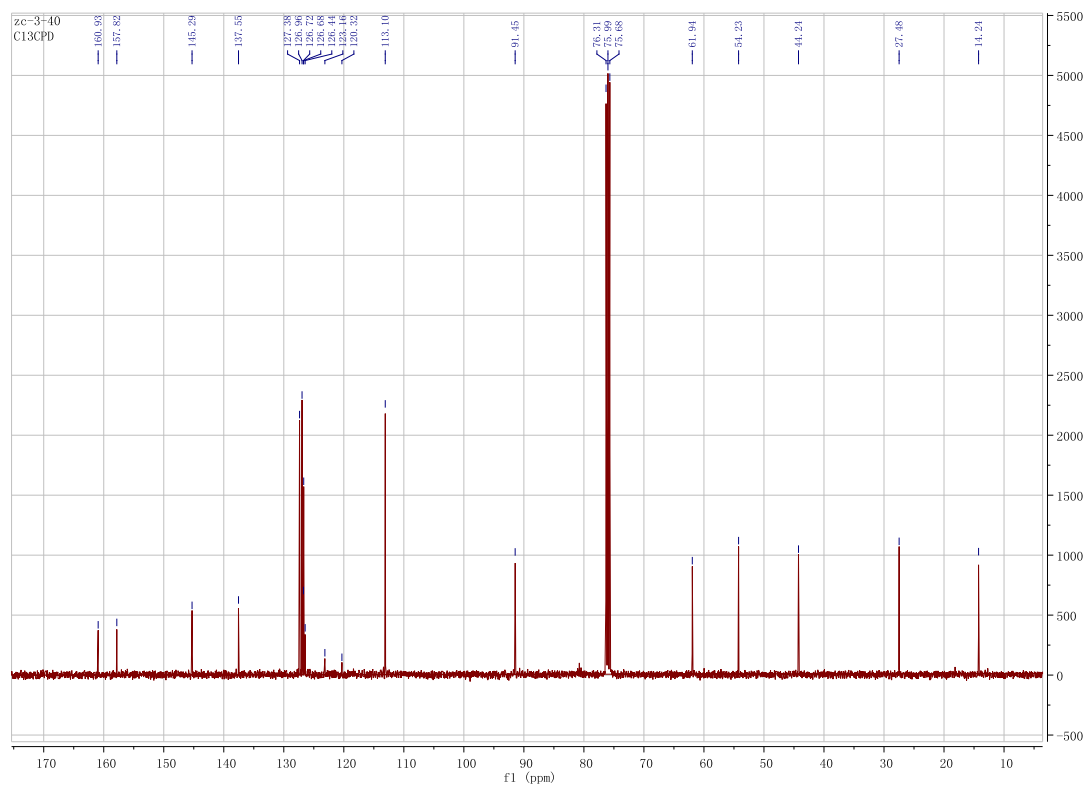

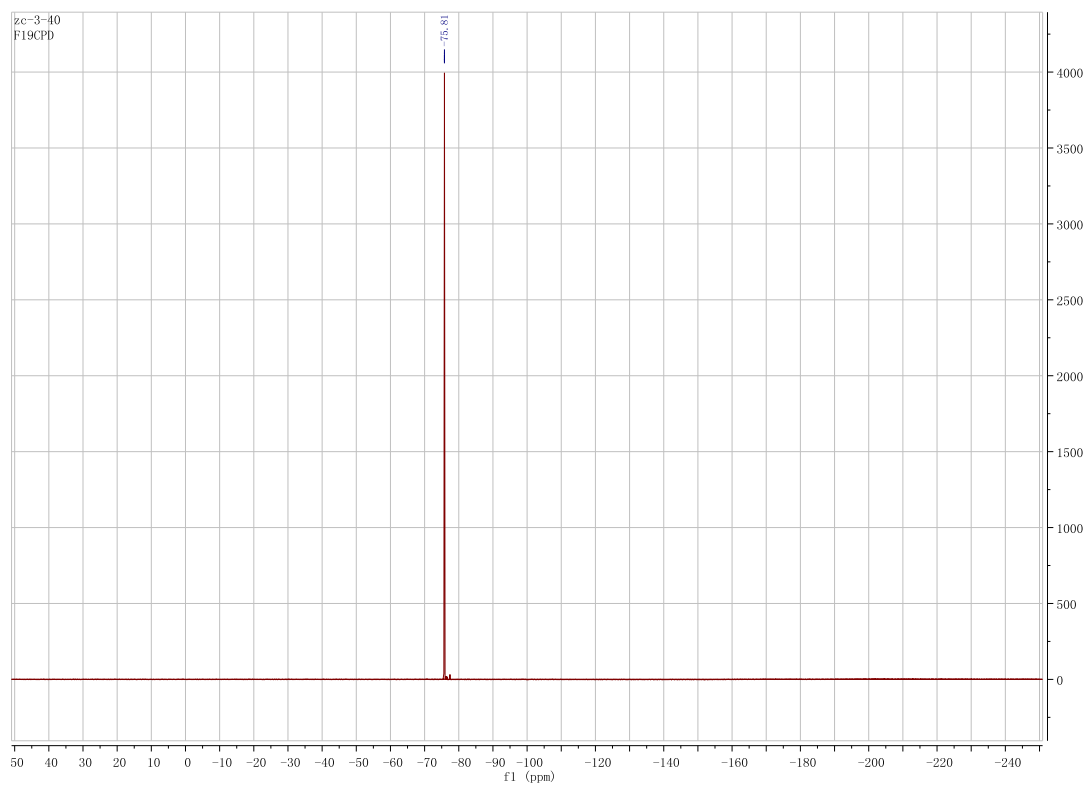

Varian ProMALDI  
File: zc-3-40\_MALDI.trans

Mode: Positive Date: 28-MAY-2012  
Scans: 1 Time: 17:35:18  
Scale: 17.8911

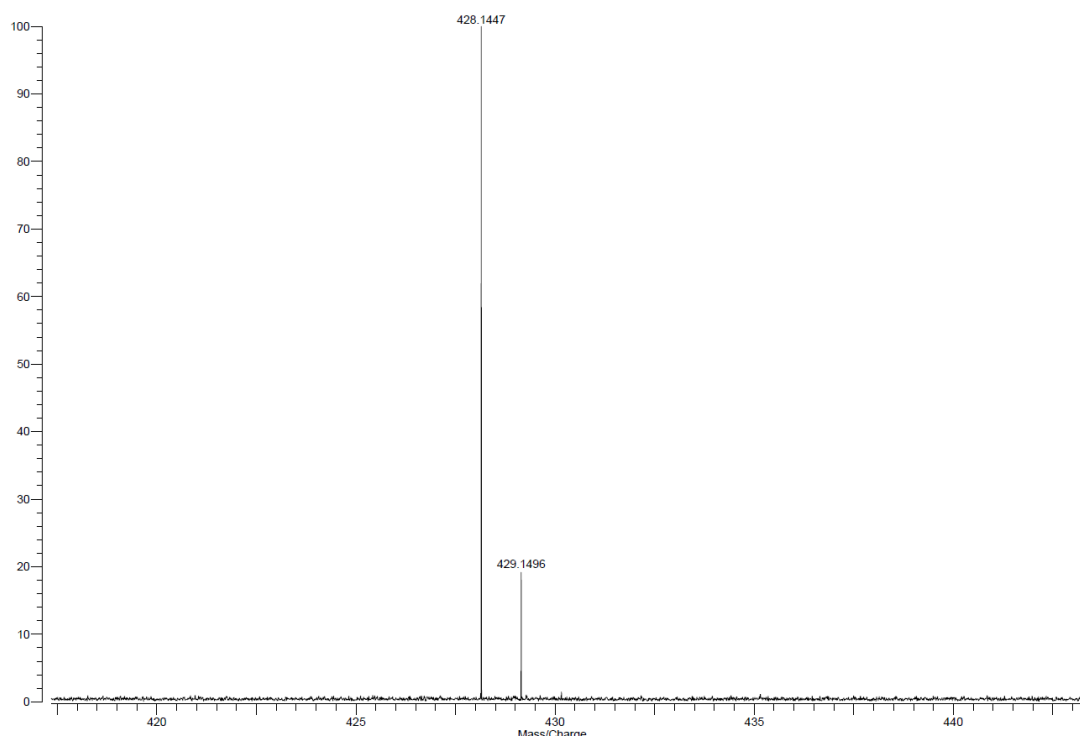

2g

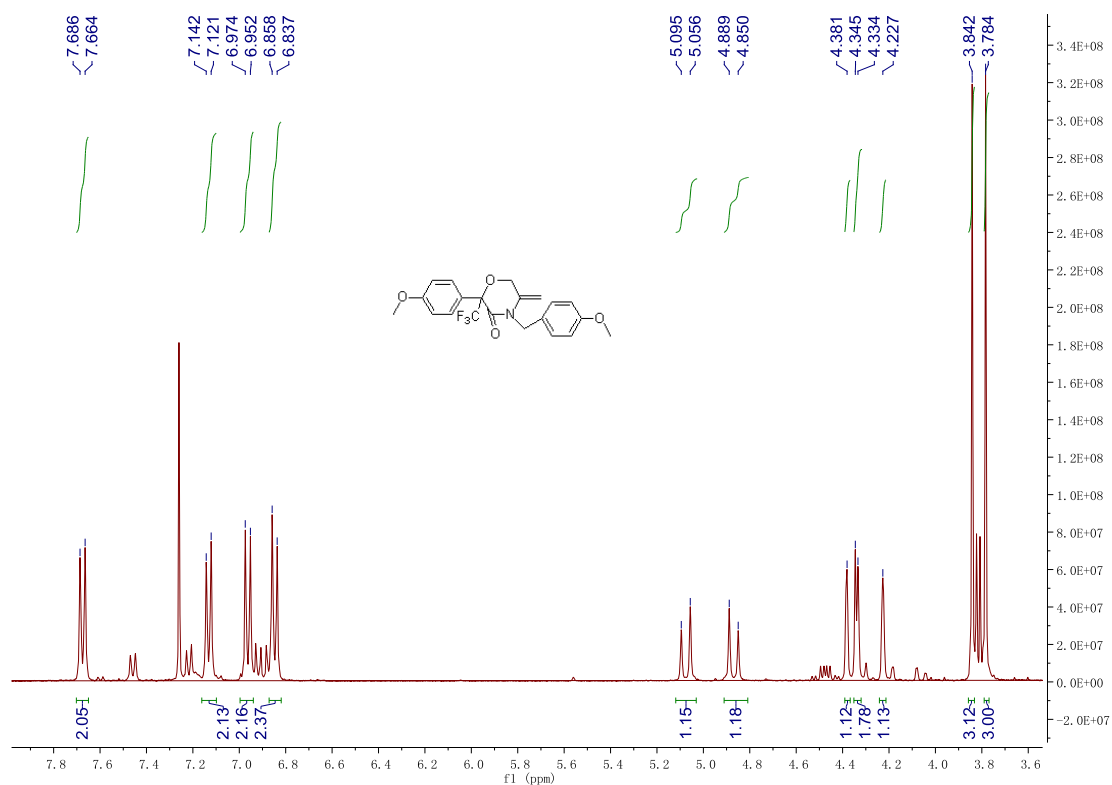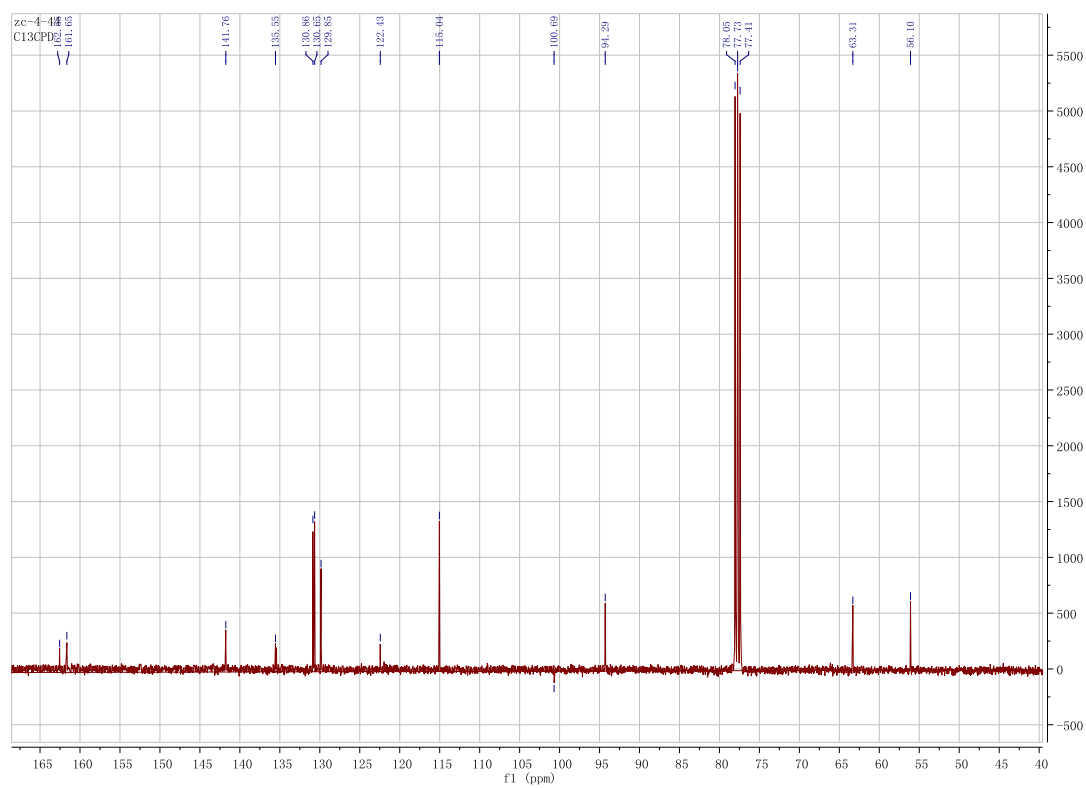

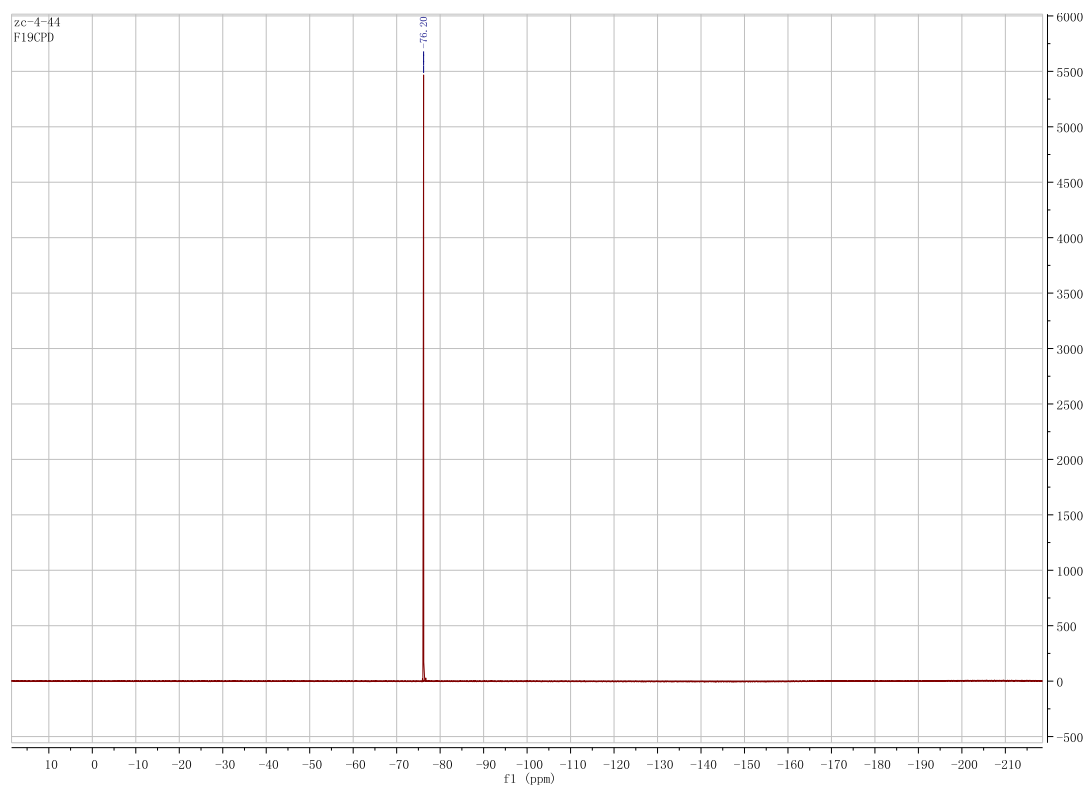

Varian QFT-ESI  
File: Zc-4-44\_ESI.trans

Mode: Positive  
Scans: 1

Date: 13-JUN-2012  
Time: 17:53:16  
Scale: 4.4698

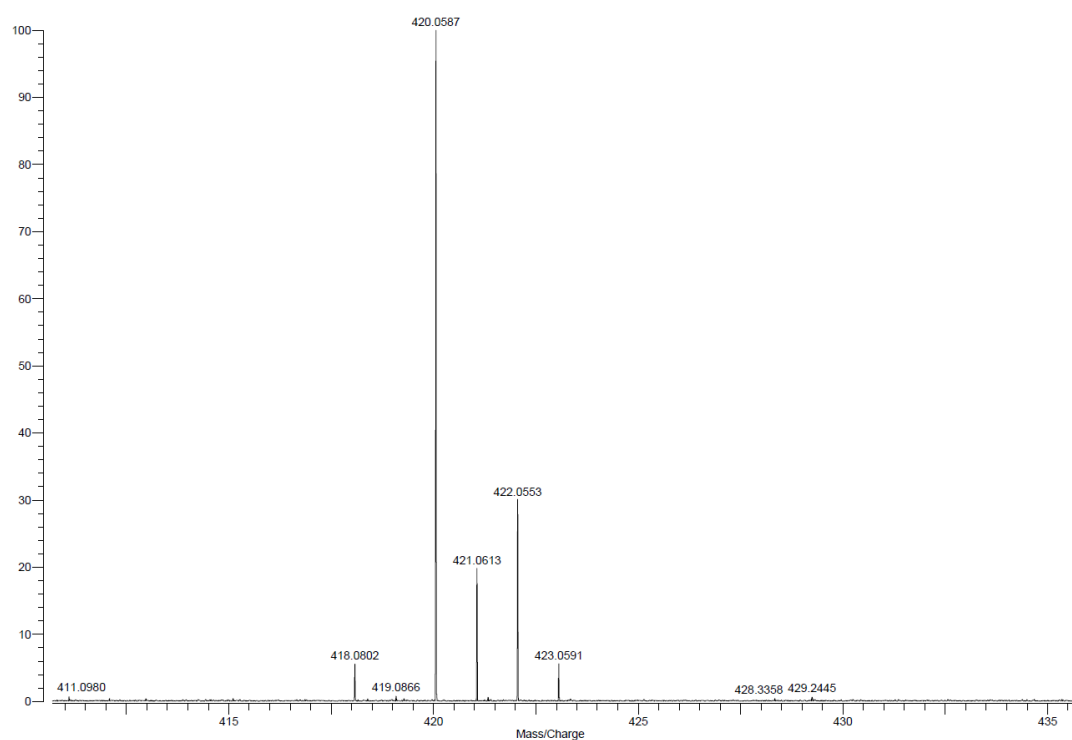

2h

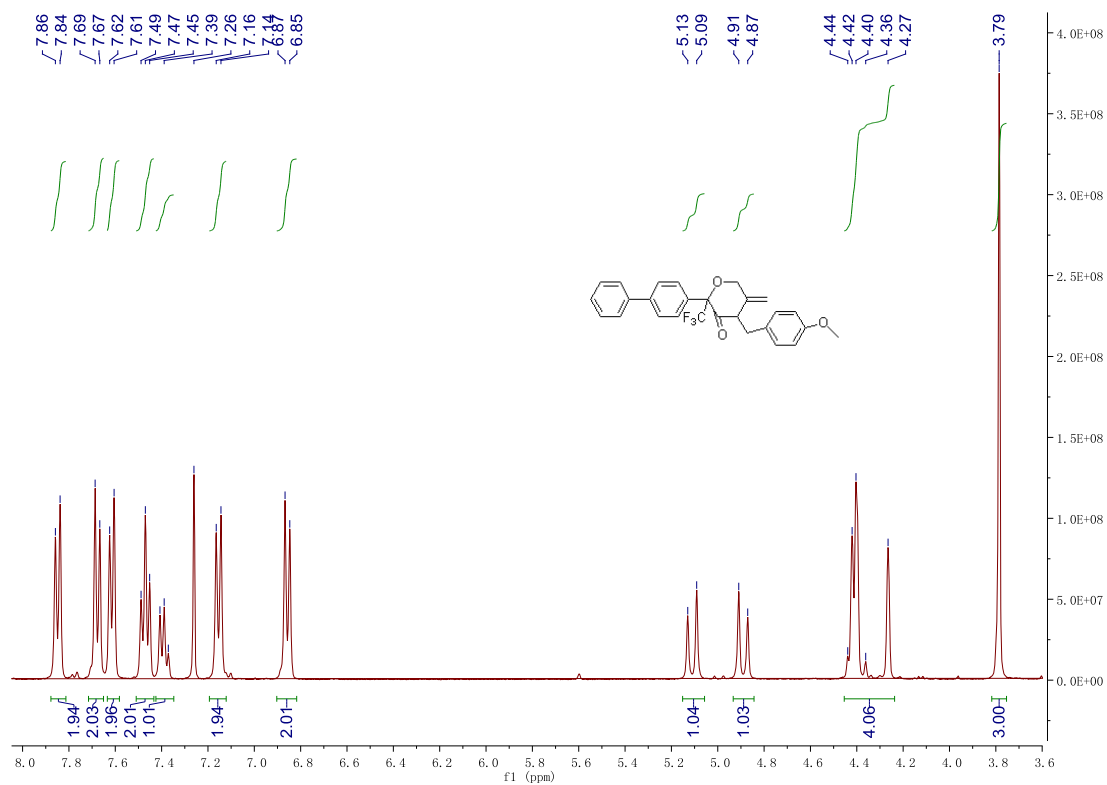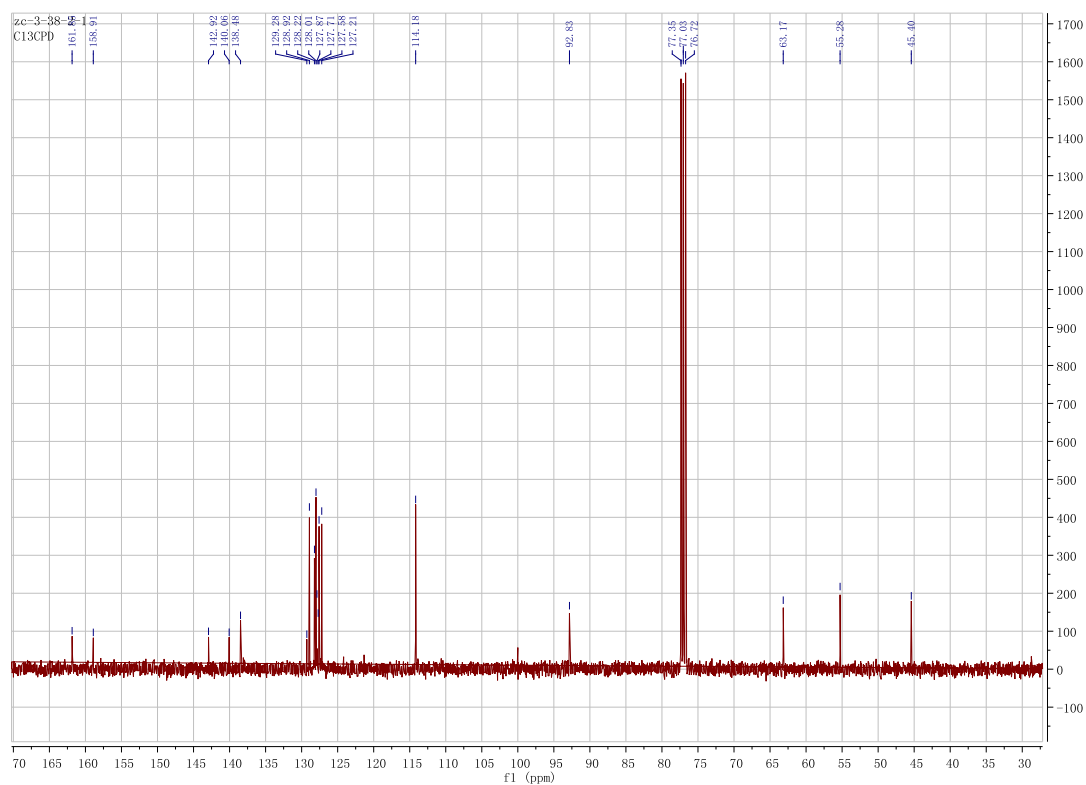



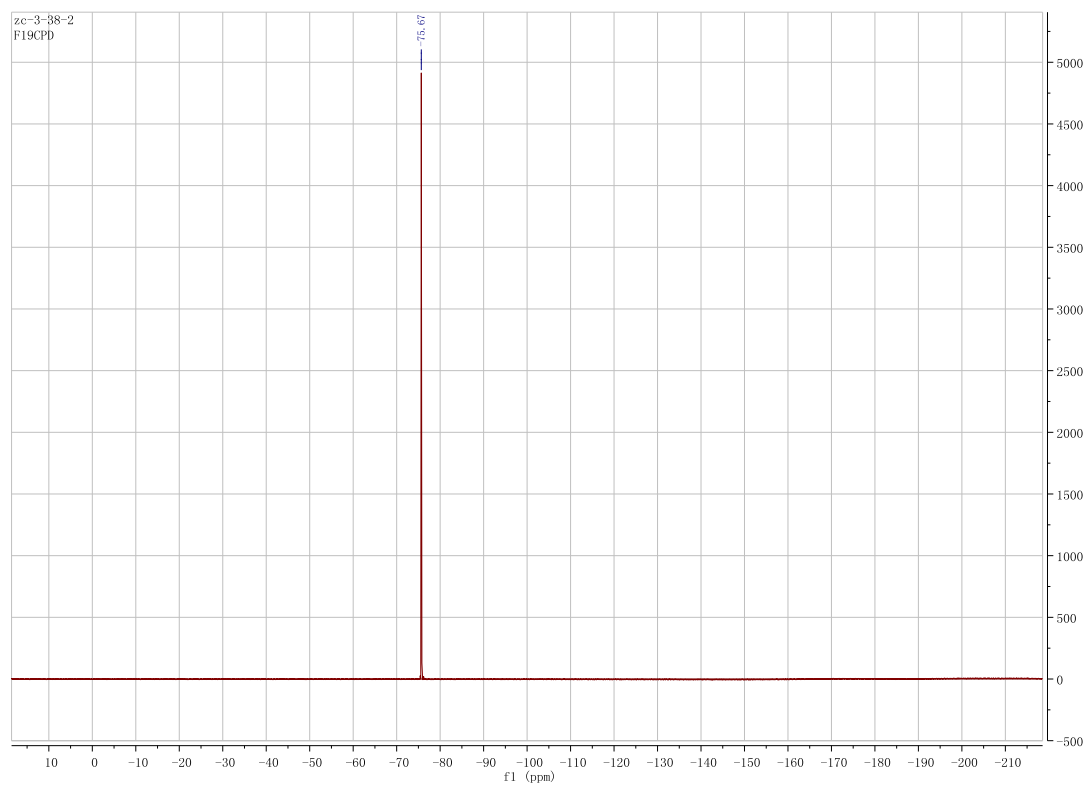

Varian ProMALDI  
File: zc-3-38\_MALDI.trans

Mode: Positive  
Scans: 1  
Date: 28-MAY-2012  
Time: 17:32:42  
Scale: 89.2539

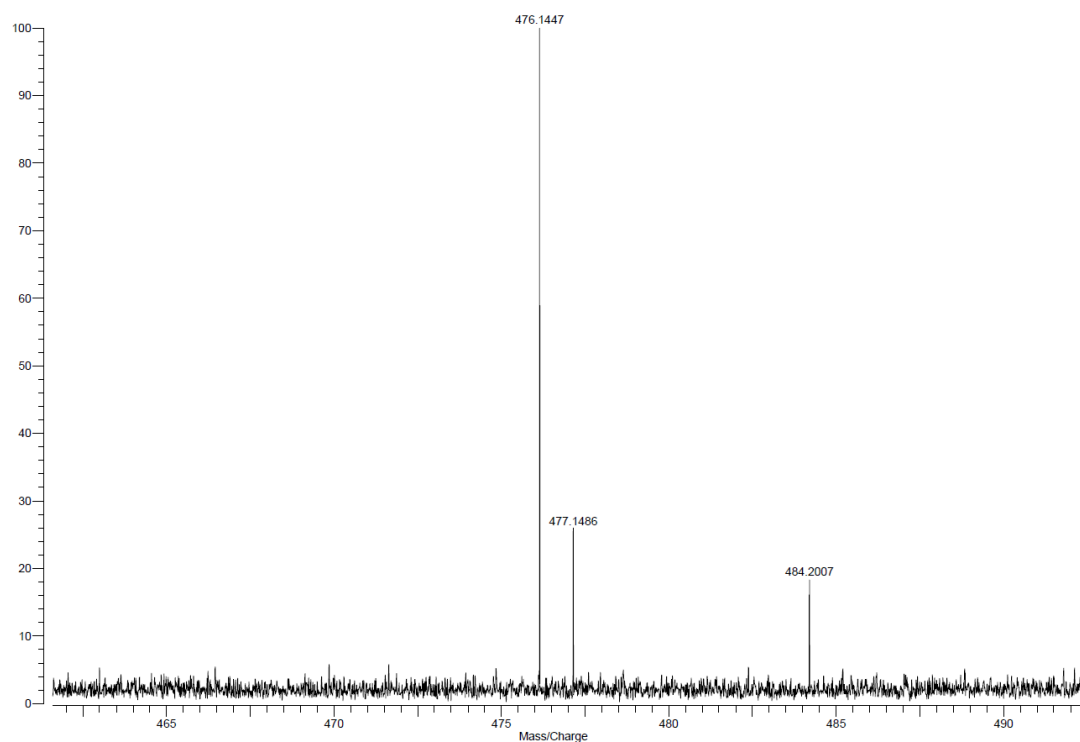

2i

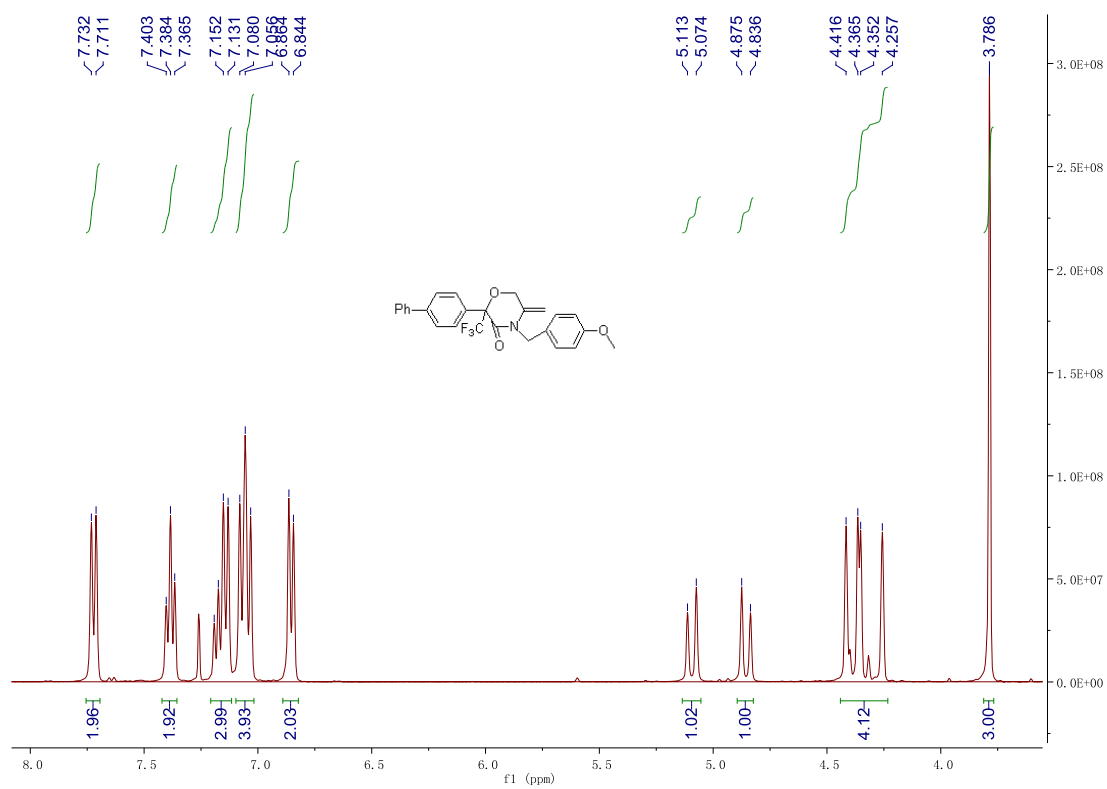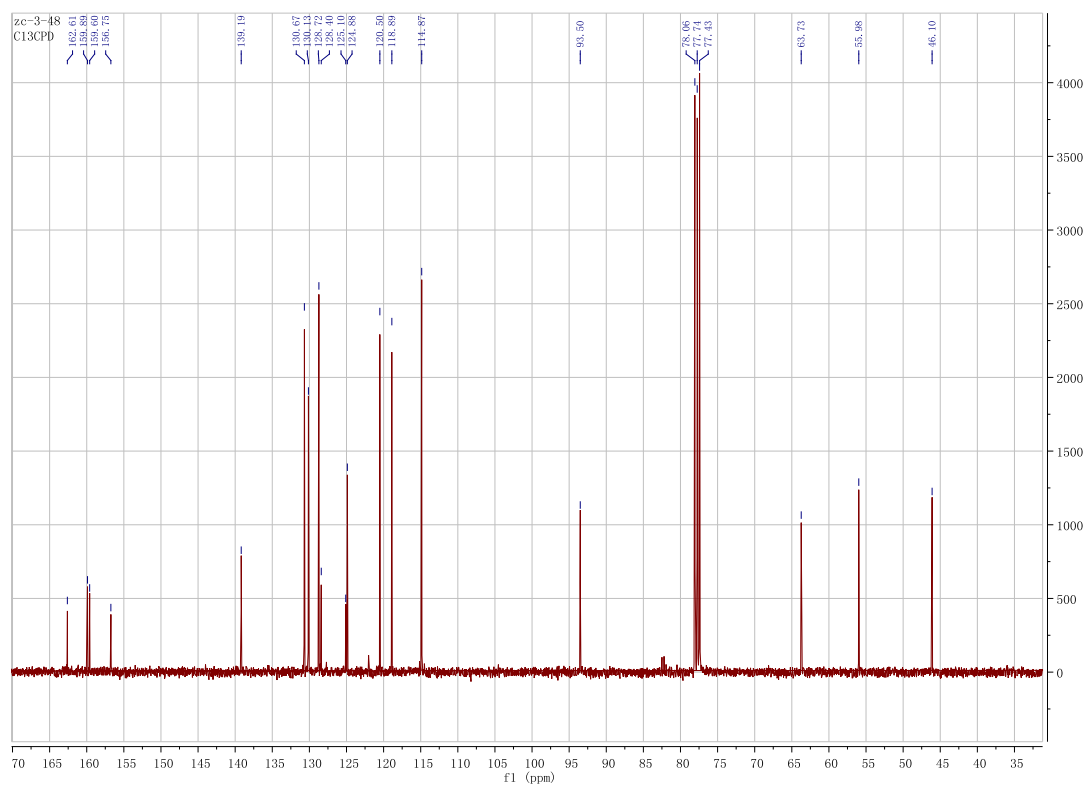

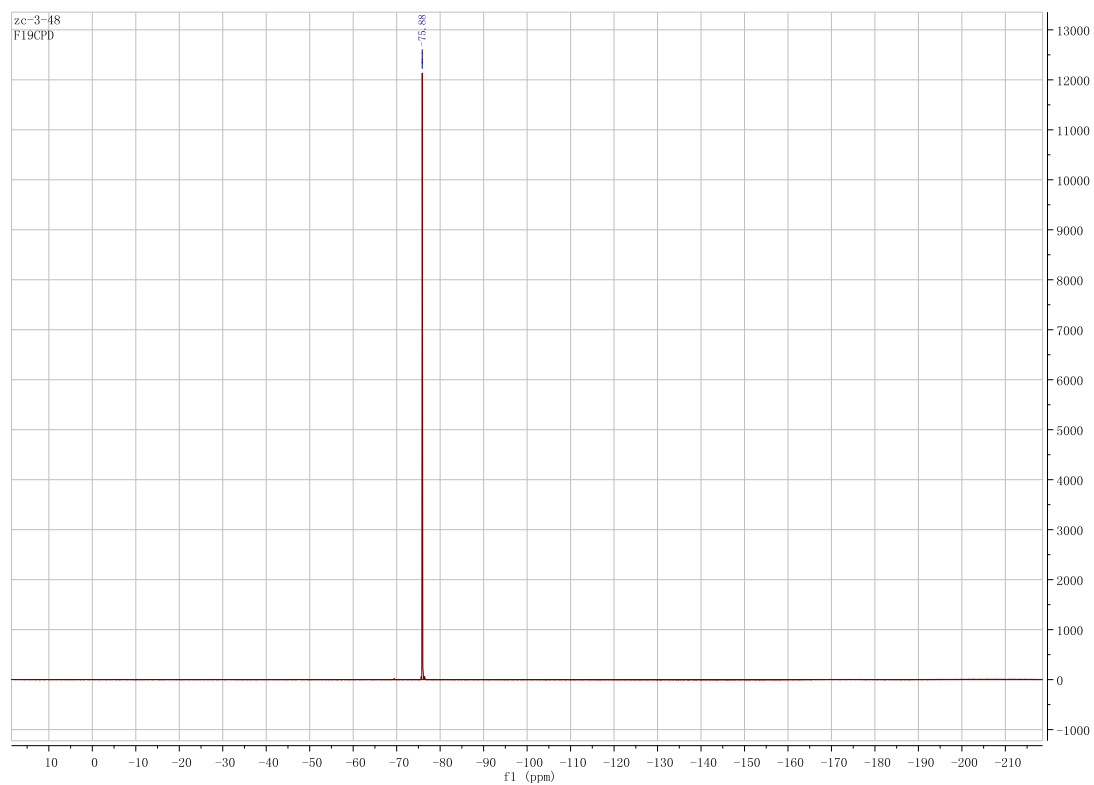

Varian ProMALDI  
File: zc-3-48\_MALDI.trans

Mode: Positive  
Scans: 1

Date: 28-MAY-2012  
Time: 17:38:43  
Scale: 34.7717

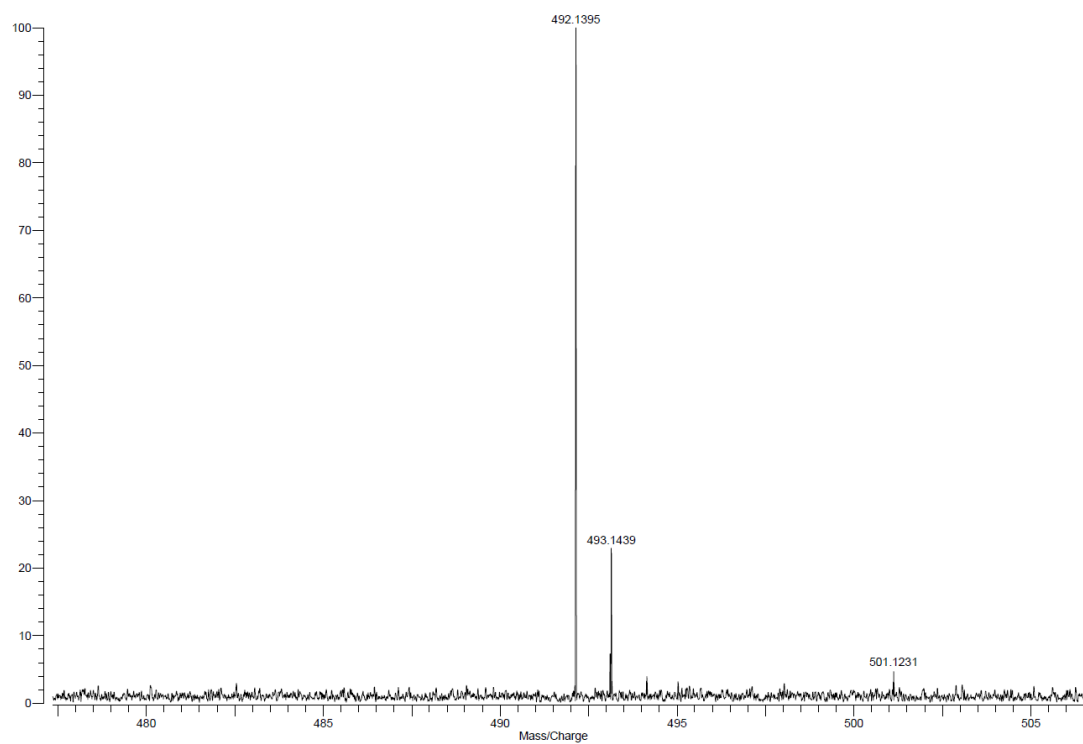

Chemical structure of compound 10 is shown above the spectrum.

<sup>1</sup>H NMR spectrum (CDCl<sub>3</sub>) data:

| Chemical Shift (ppm)       | Integration |
|----------------------------|-------------|
| 7.808, 7.800, 7.791, 7.782 | 1.92        |
| 7.487, 7.480, 7.471        | 2.91        |
| 7.200, 7.195, 7.181        | 3.82        |
| 7.26 (solvent)             | -           |
| 4.565, 4.531, 4.497, 4.462 | 2.02        |
| 4.237                      | 1.00        |
| 3.858, 3.854               | 0.98        |

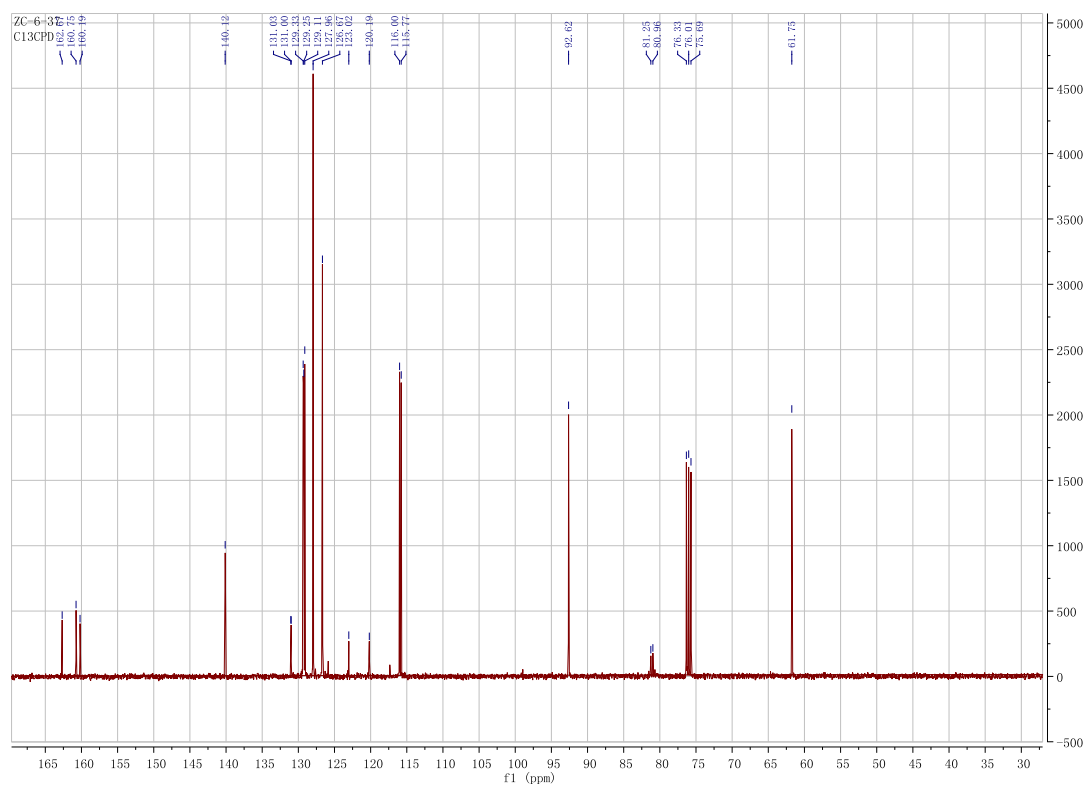

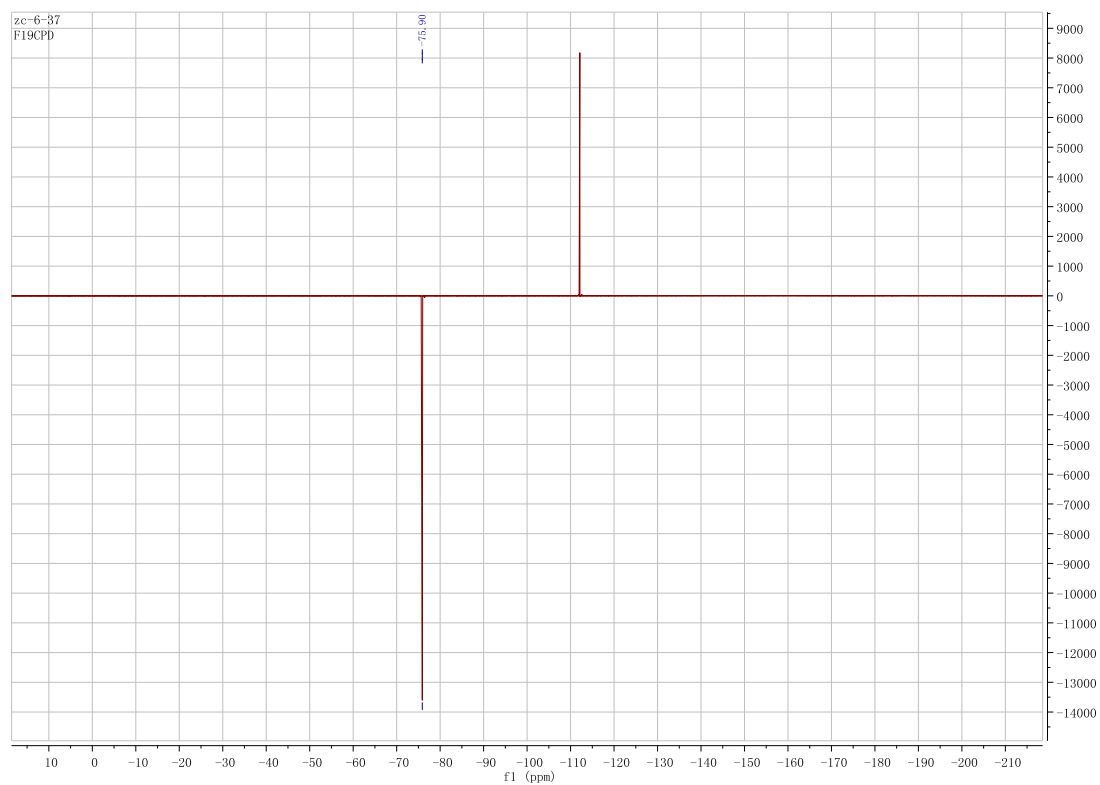

Varian QFT-ESI  
File: 6-37\_ESI.trans

Mode: Positive  
Scans: 1

Date: 10-DEC-2012  
Time: 11:01:12  
Scale: 10.6270

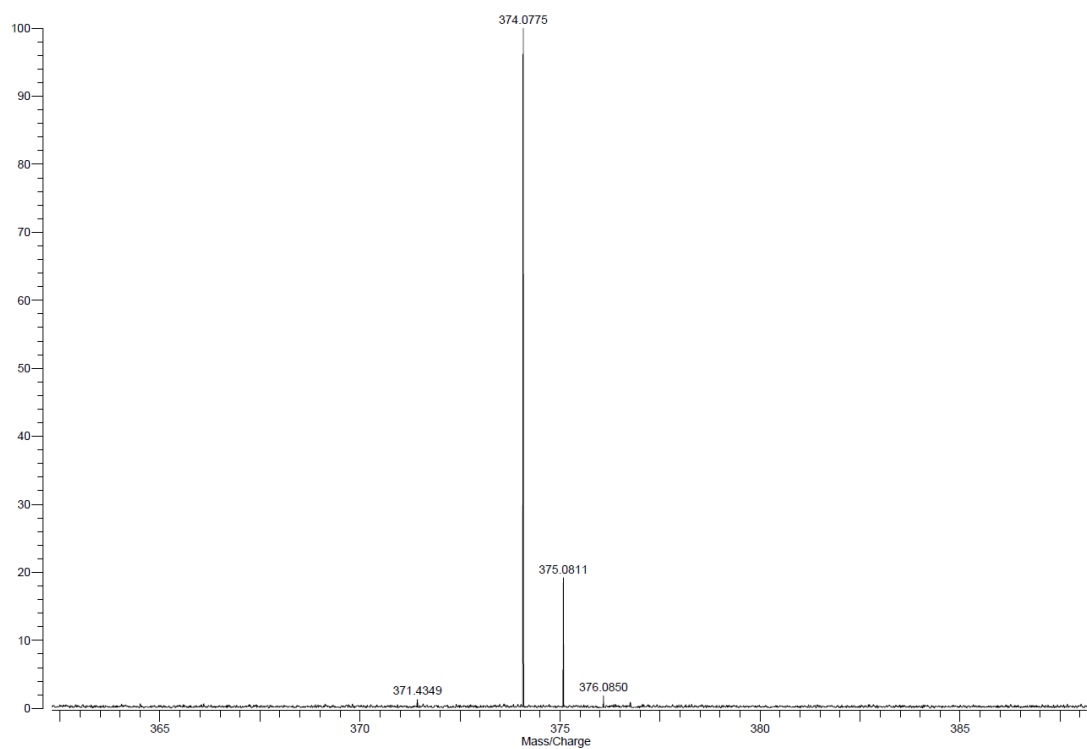

3b

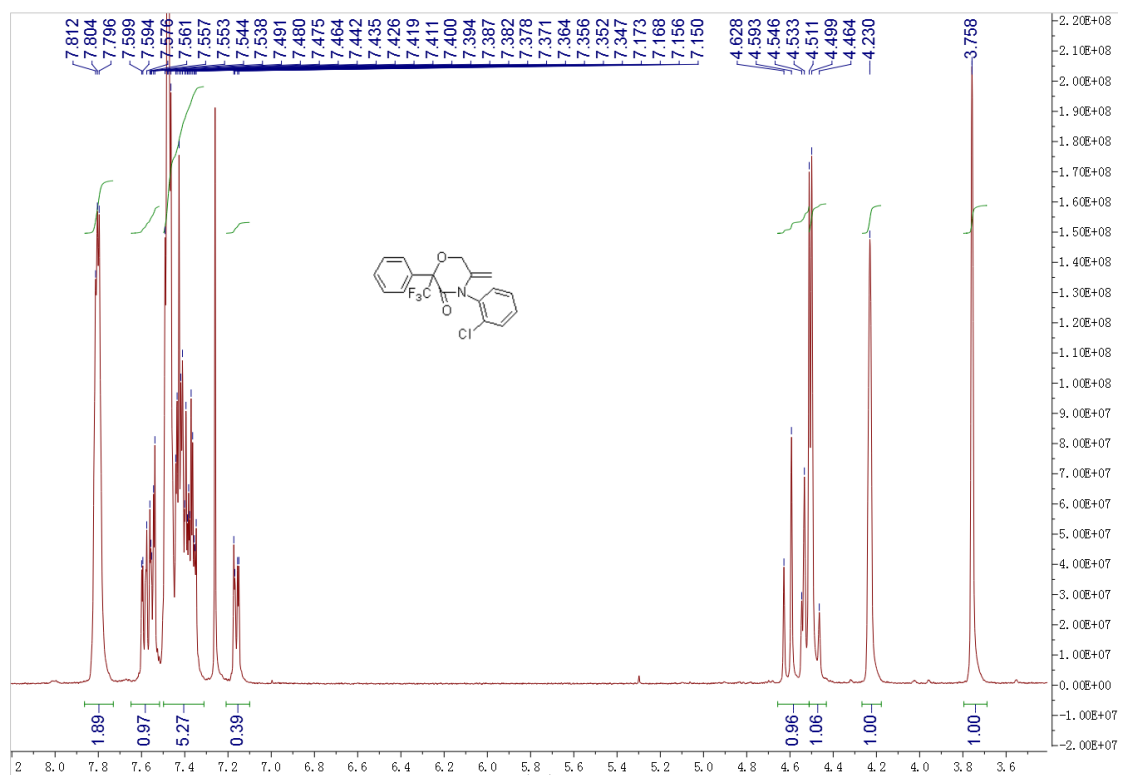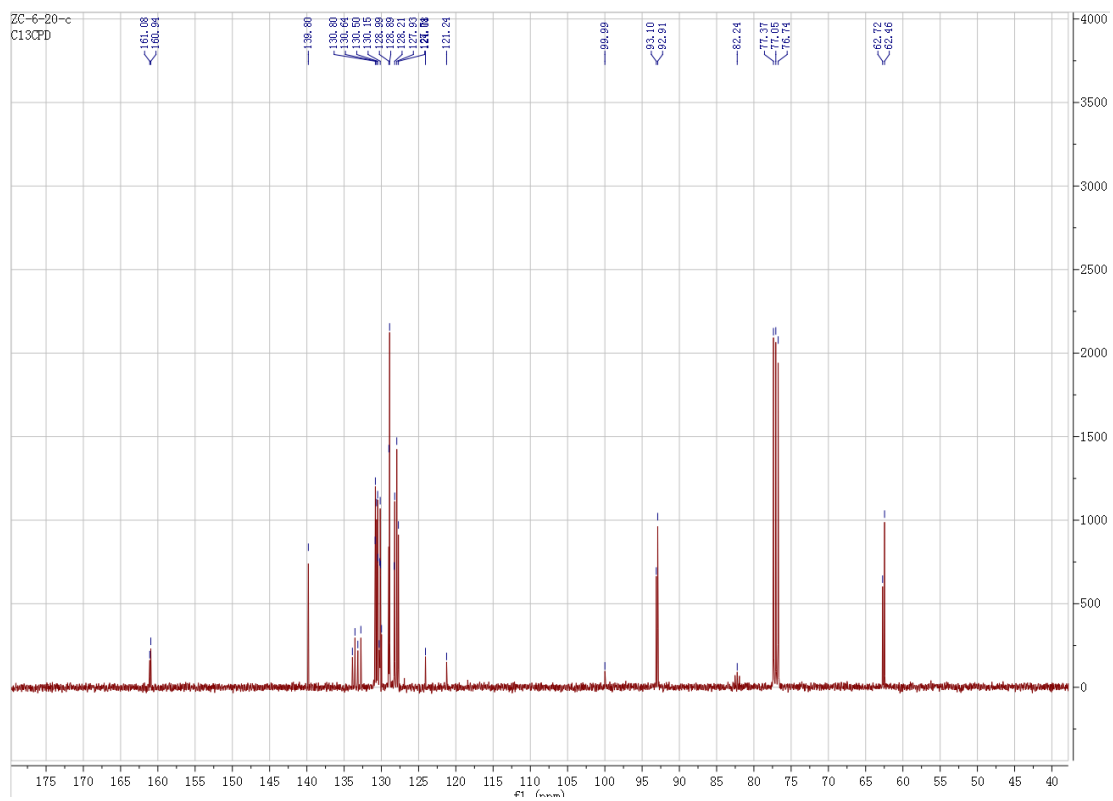

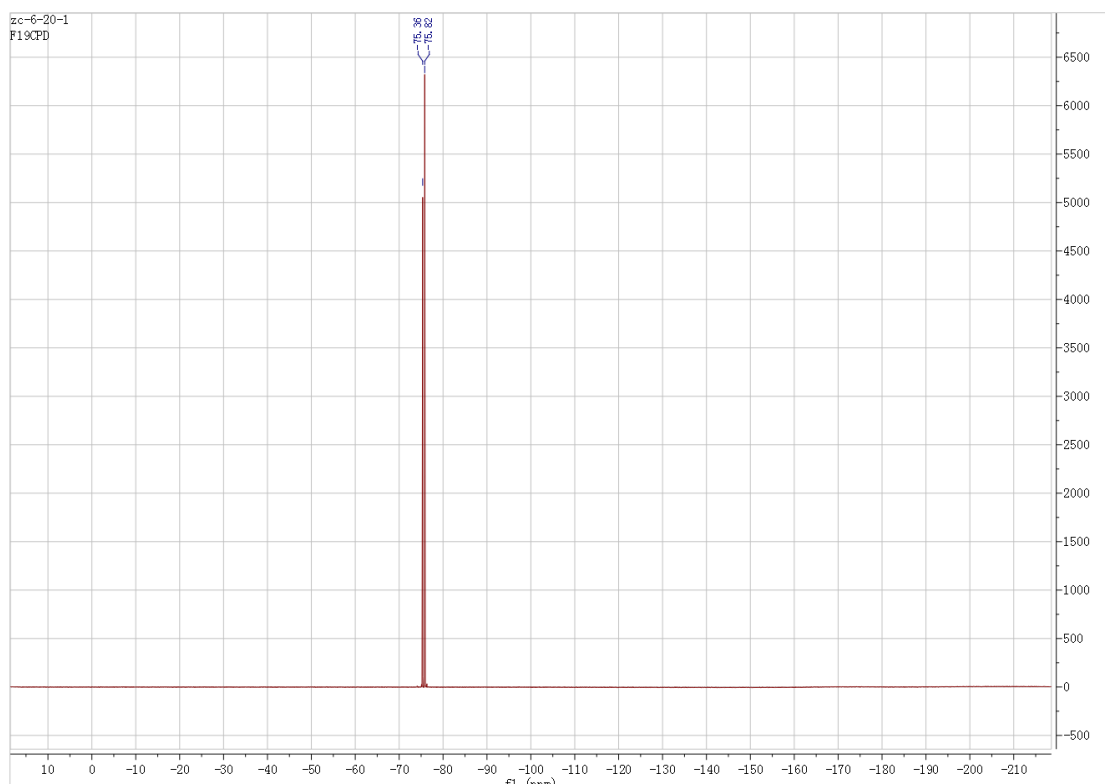

Varian QFT-ESI  
File: ZC-6-17\_ESI.trans

Mode: Positive  
Scans: 1

Date: 19-JUN-2012  
Time: 15:55:04  
Scale: 3.7154

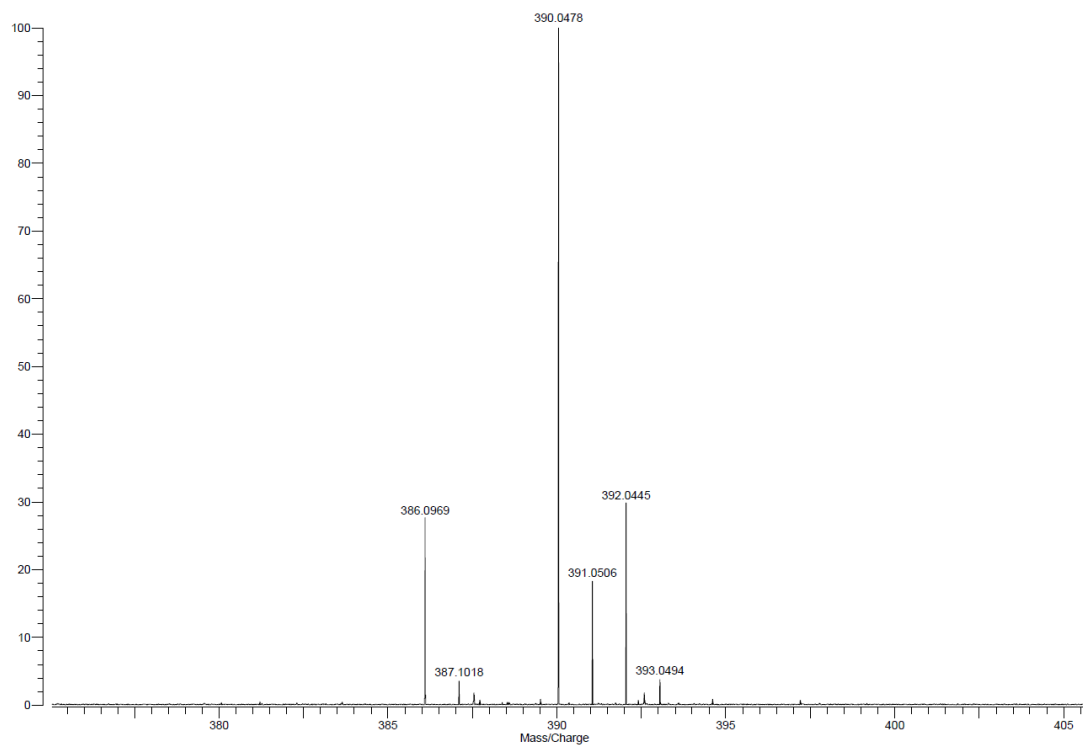

3c

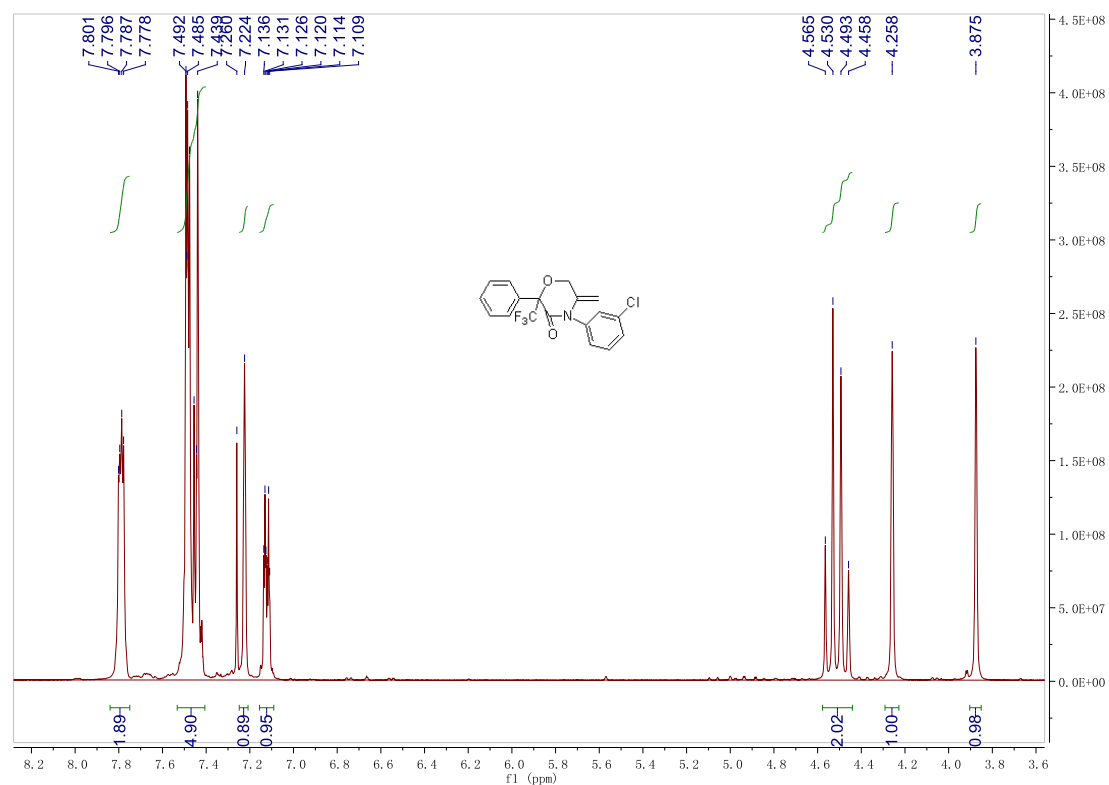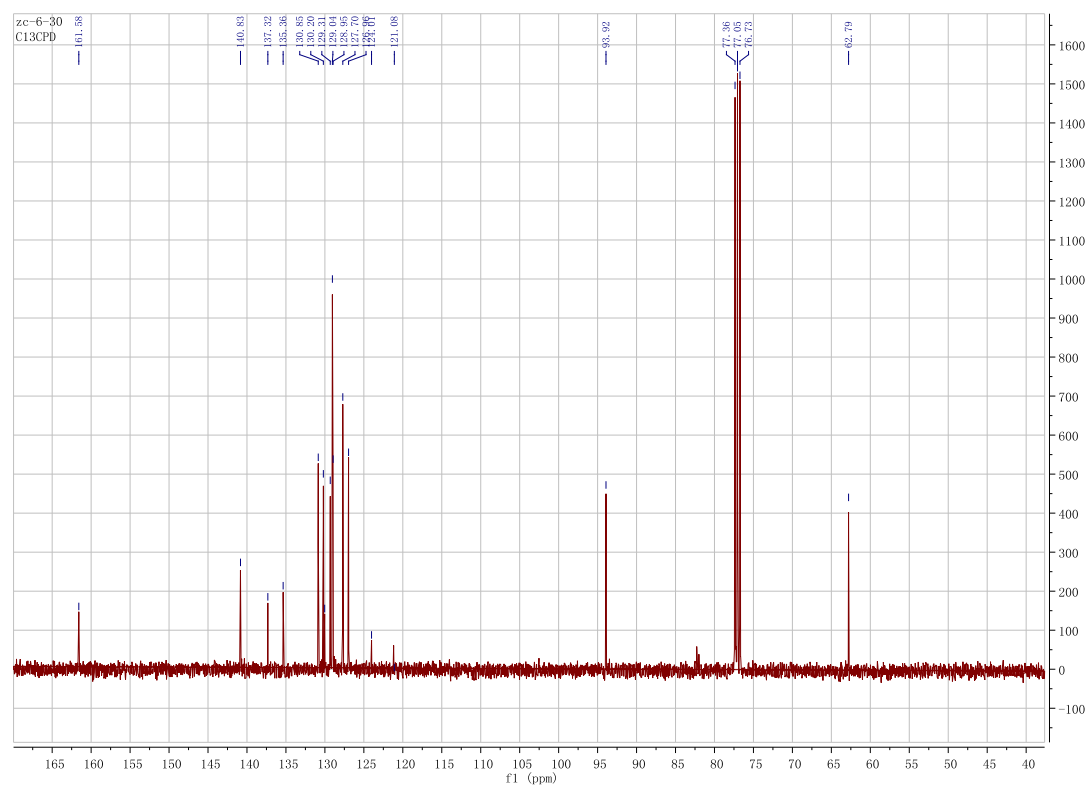



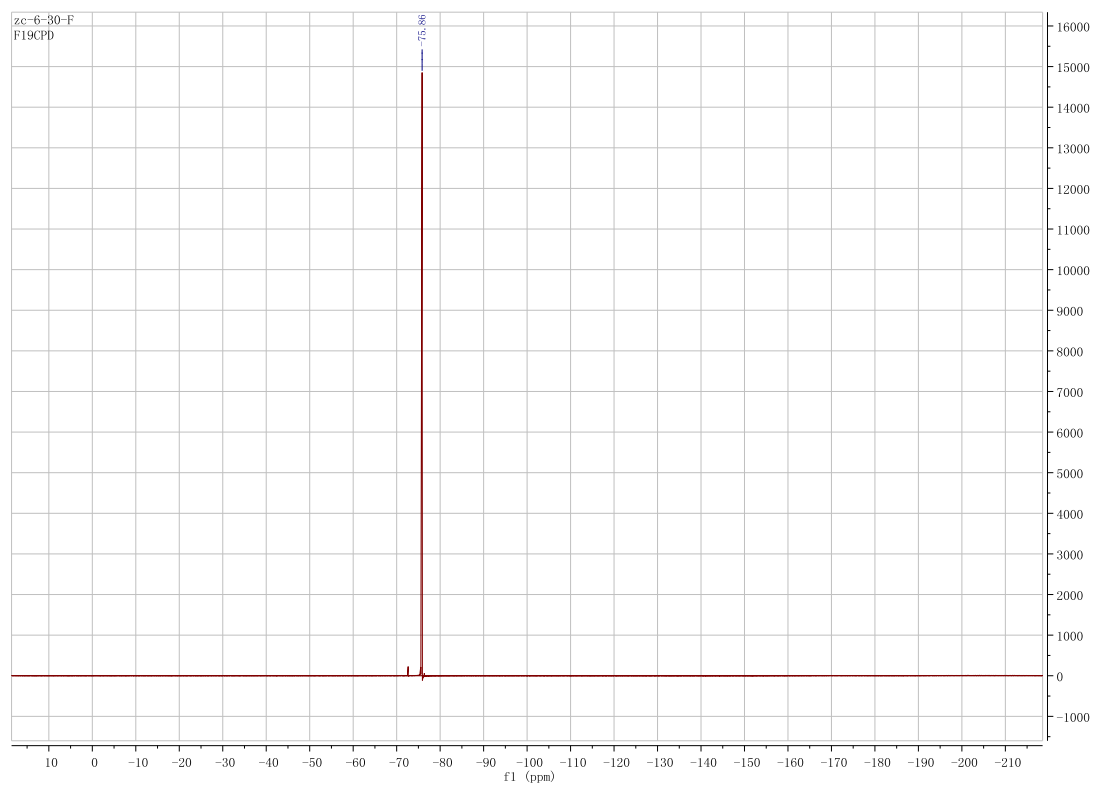

Varian QFT-ESI  
File: 6-30\_ESI.trans

Mode: Positive  
Scans: 1

Date: 10-DEC-2012  
Time: 11:02:40  
Scale: 4.0506

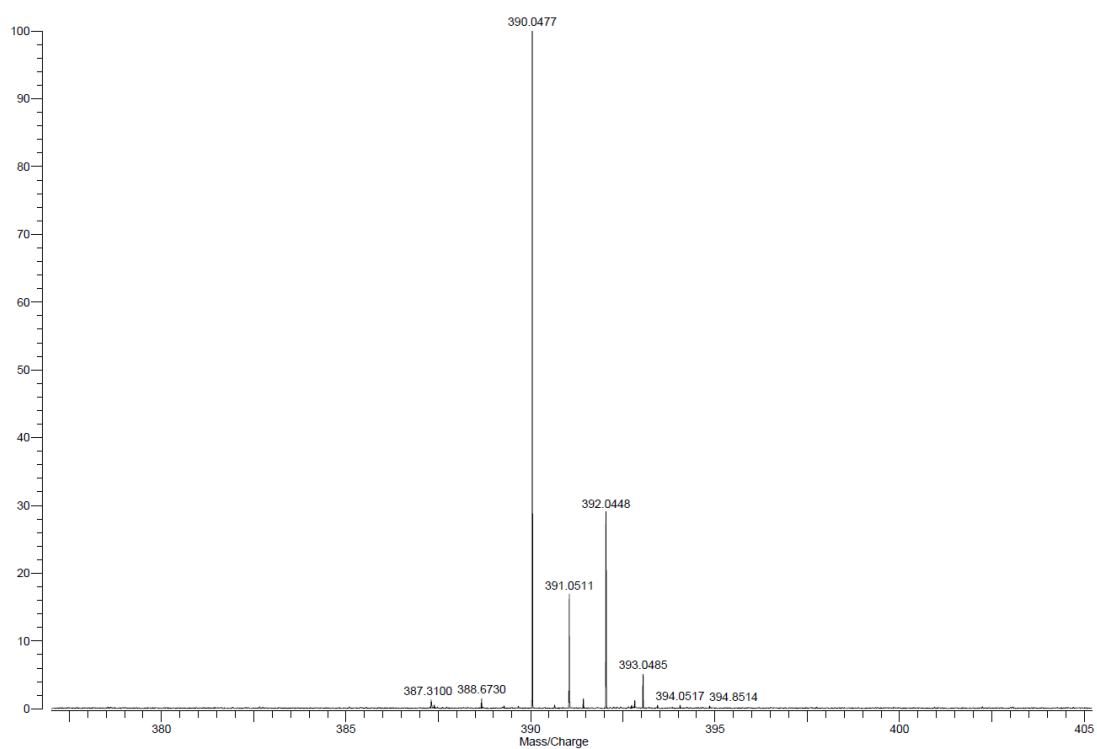

3d

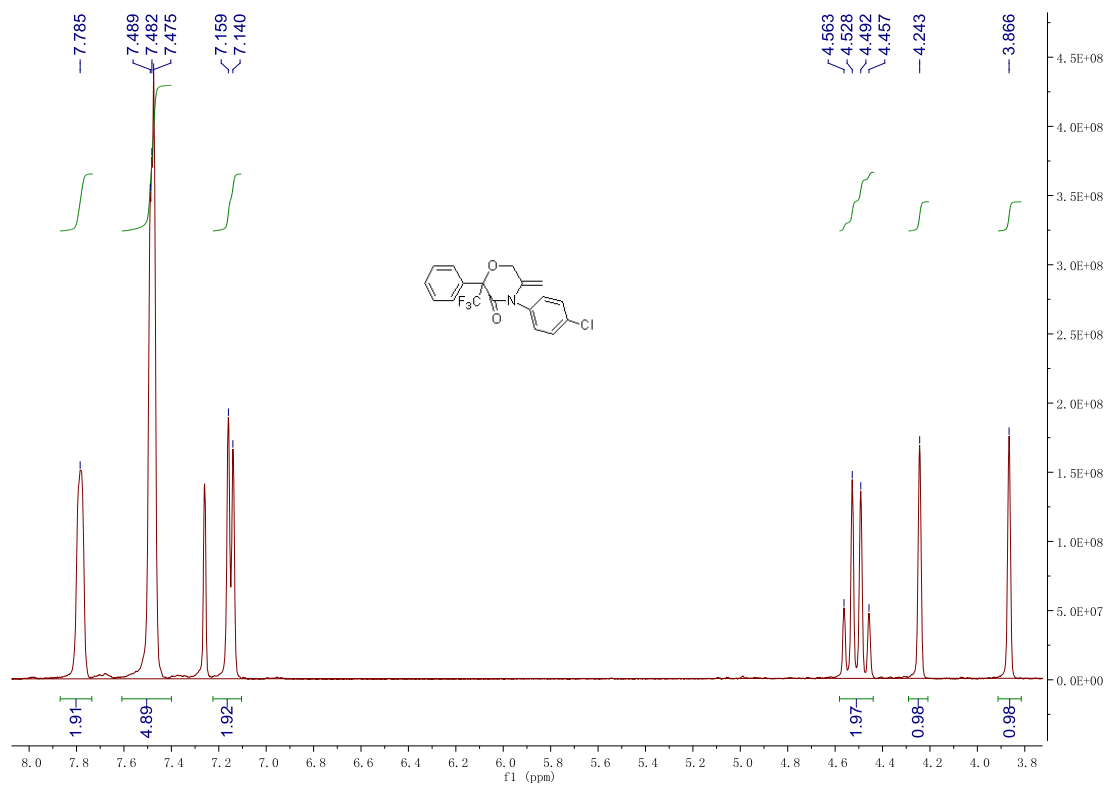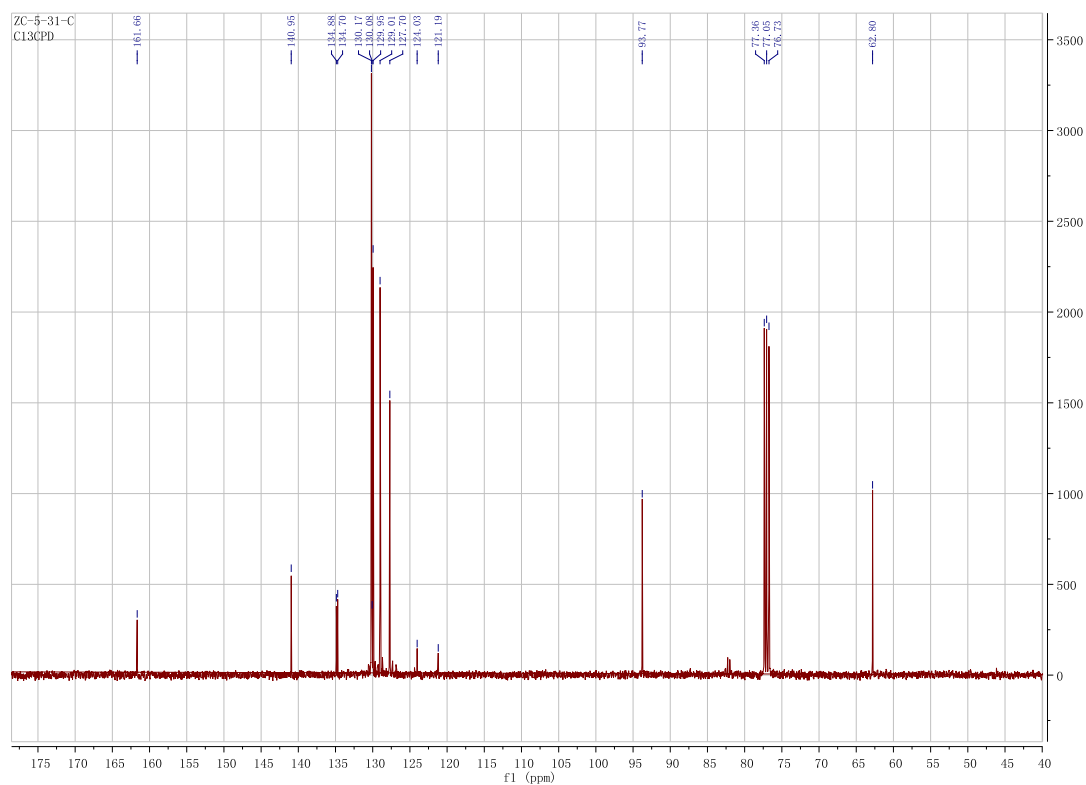

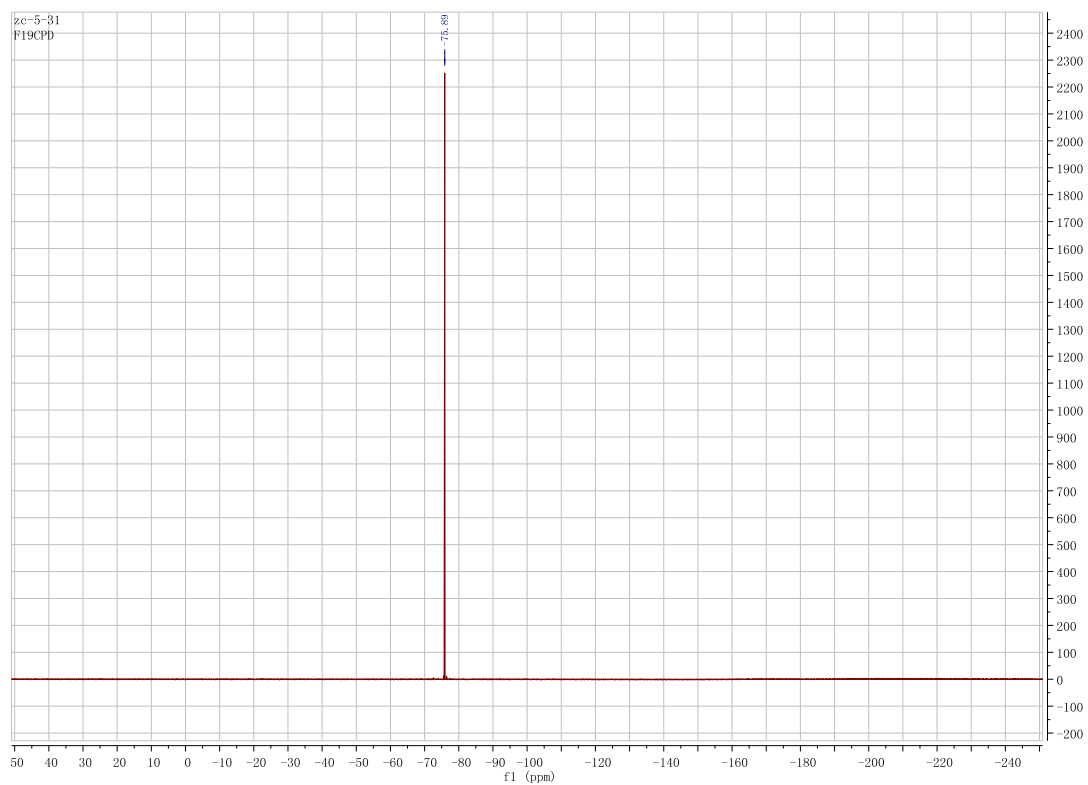

Varian QFT-ESI  
File: 2C-5-31\_ESI.trans

Mode: Positive  
Scans: 1  
Date: 19-JUN-2012  
Time: 15:57:46  
Scale: 23.4342

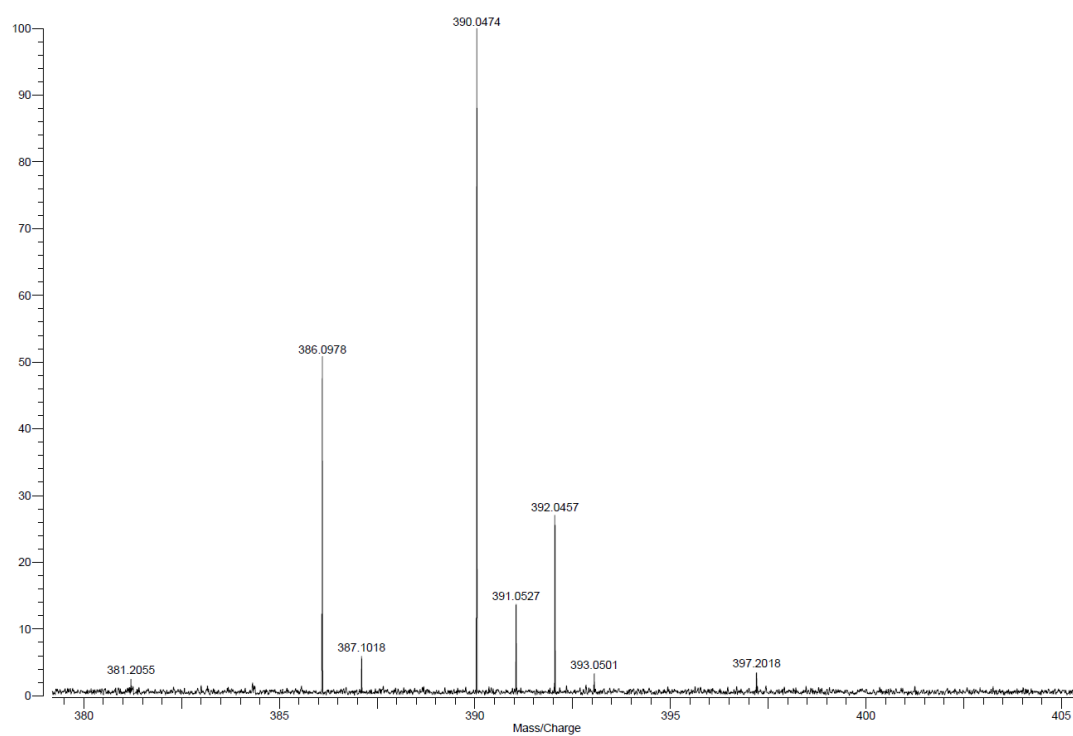

3e

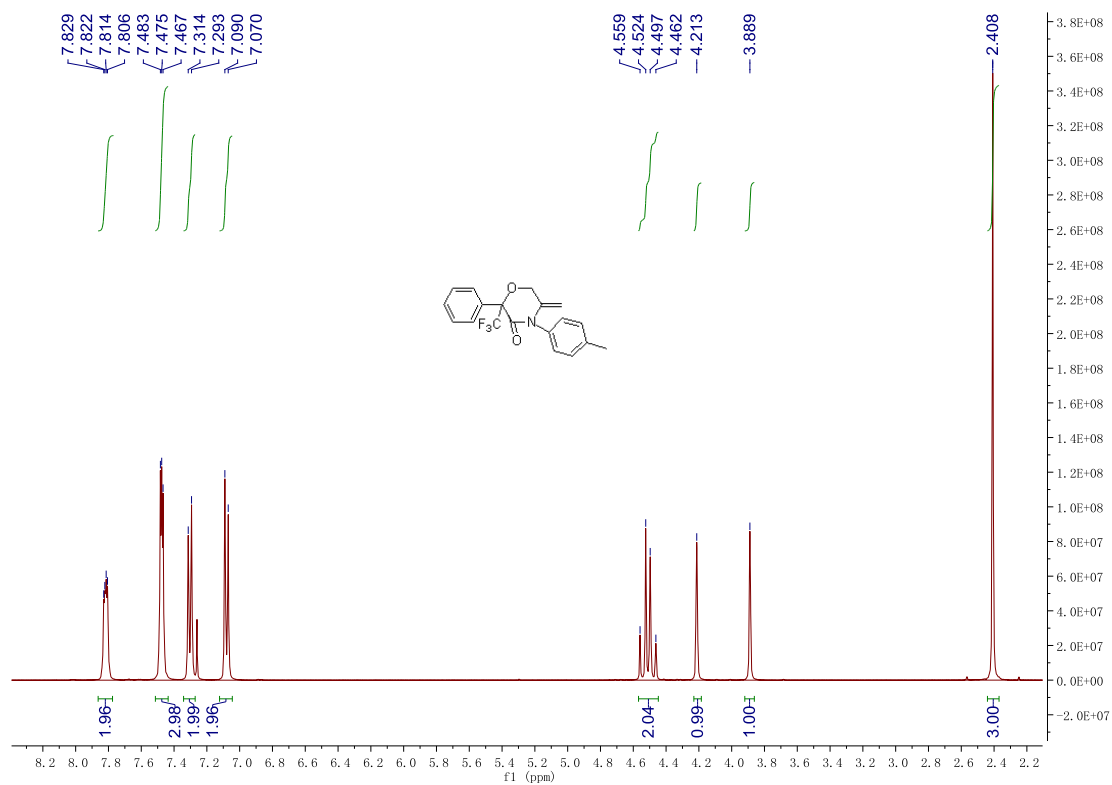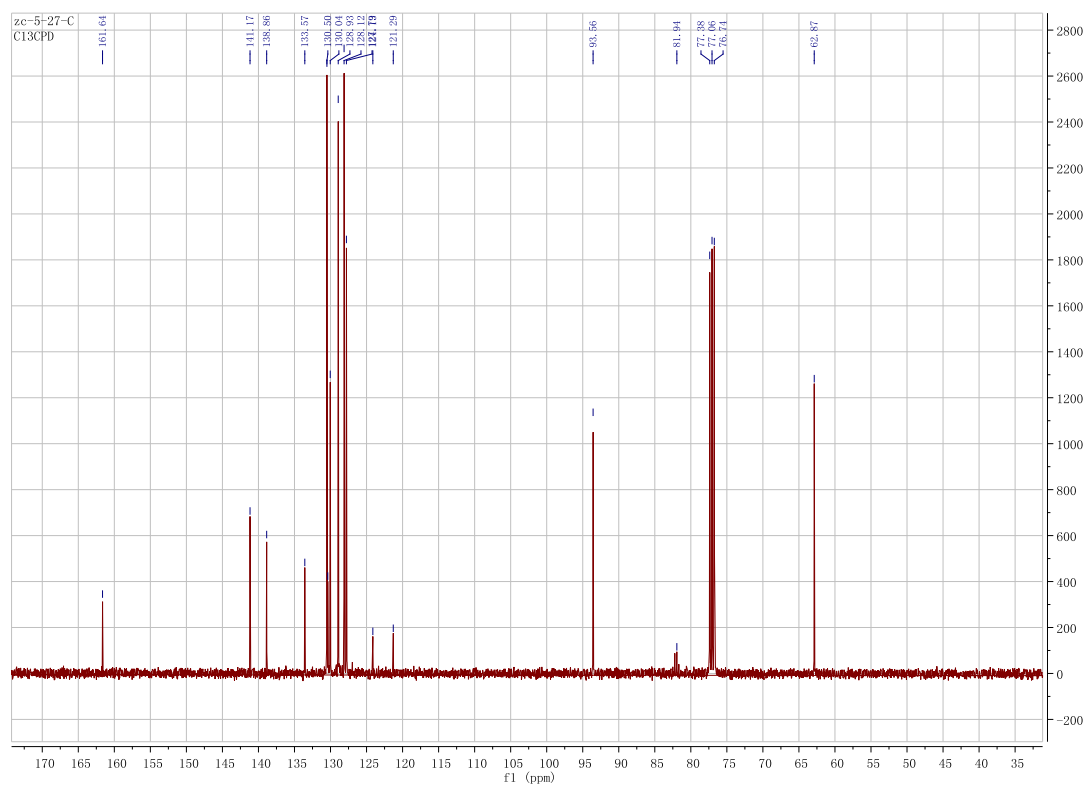

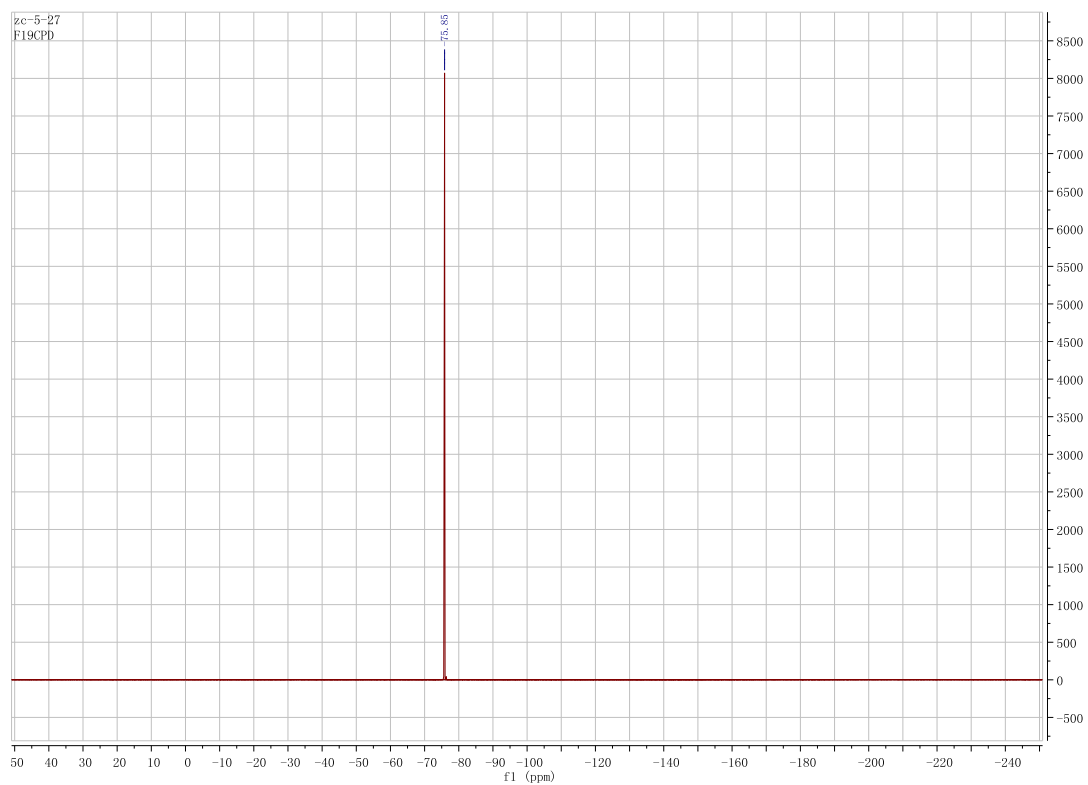

Varian QFT-ESI  
File: ZC-5-27\_ESI.trans

Mode: Positive  
Scans: 1  
Date: 19-JUN-2012  
Time: 15:51:18  
Scale: 15.2172

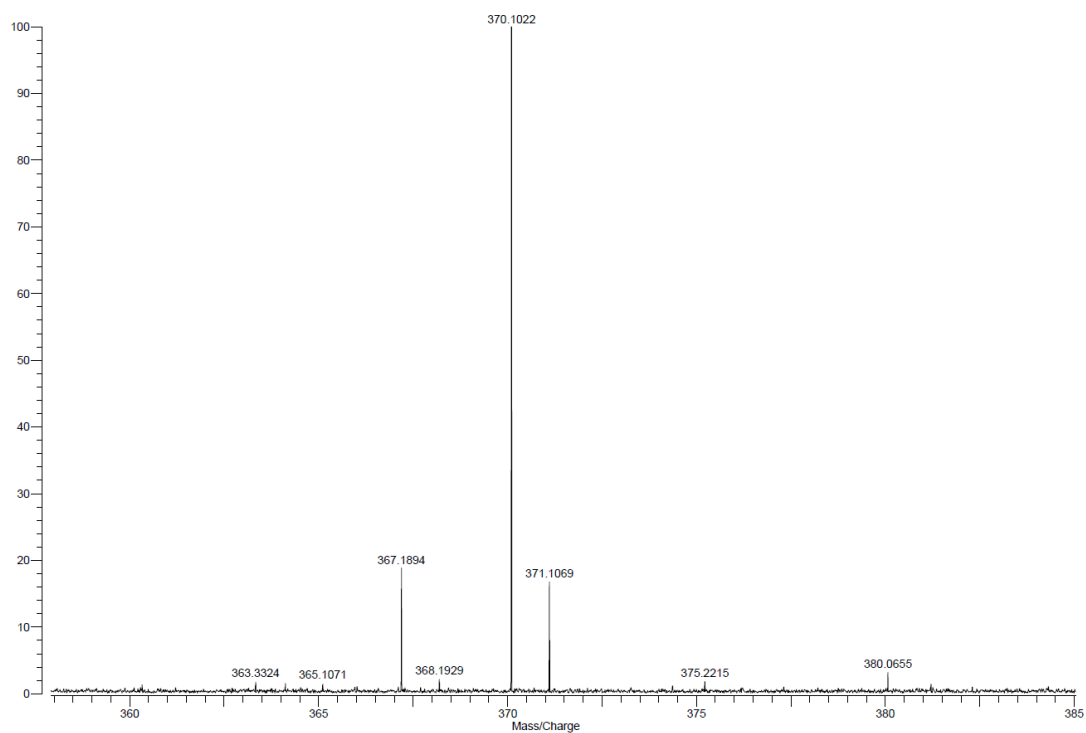

3f

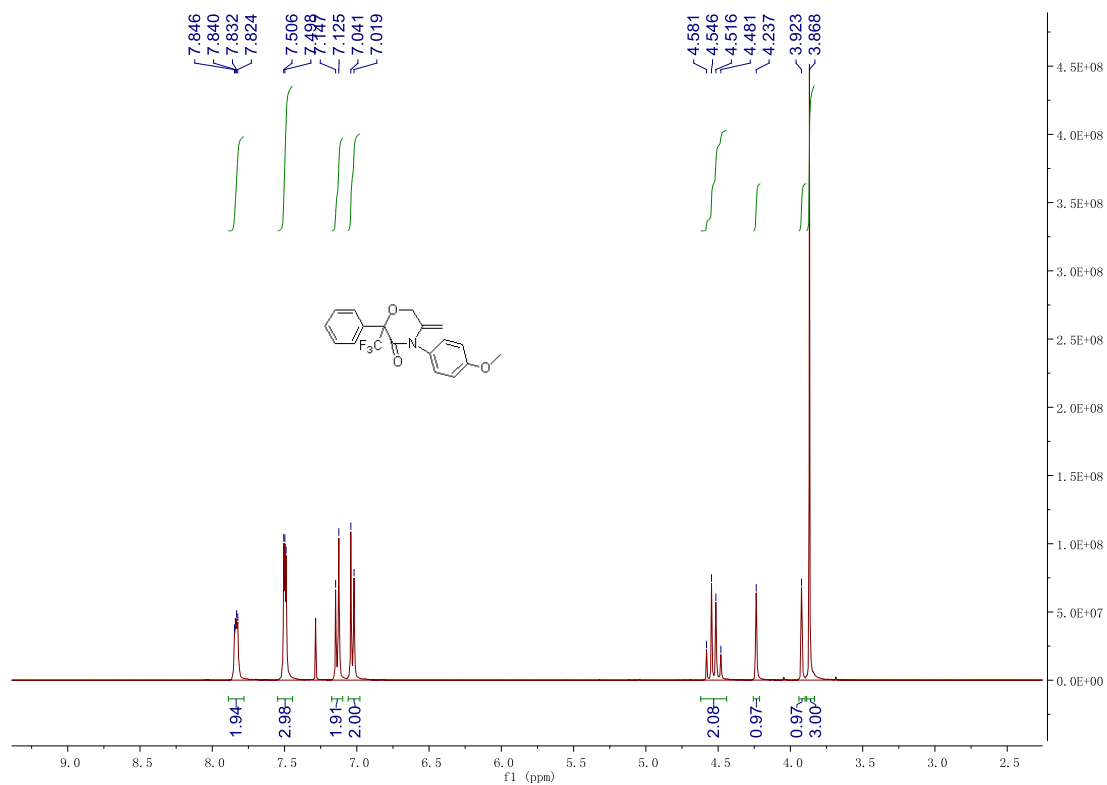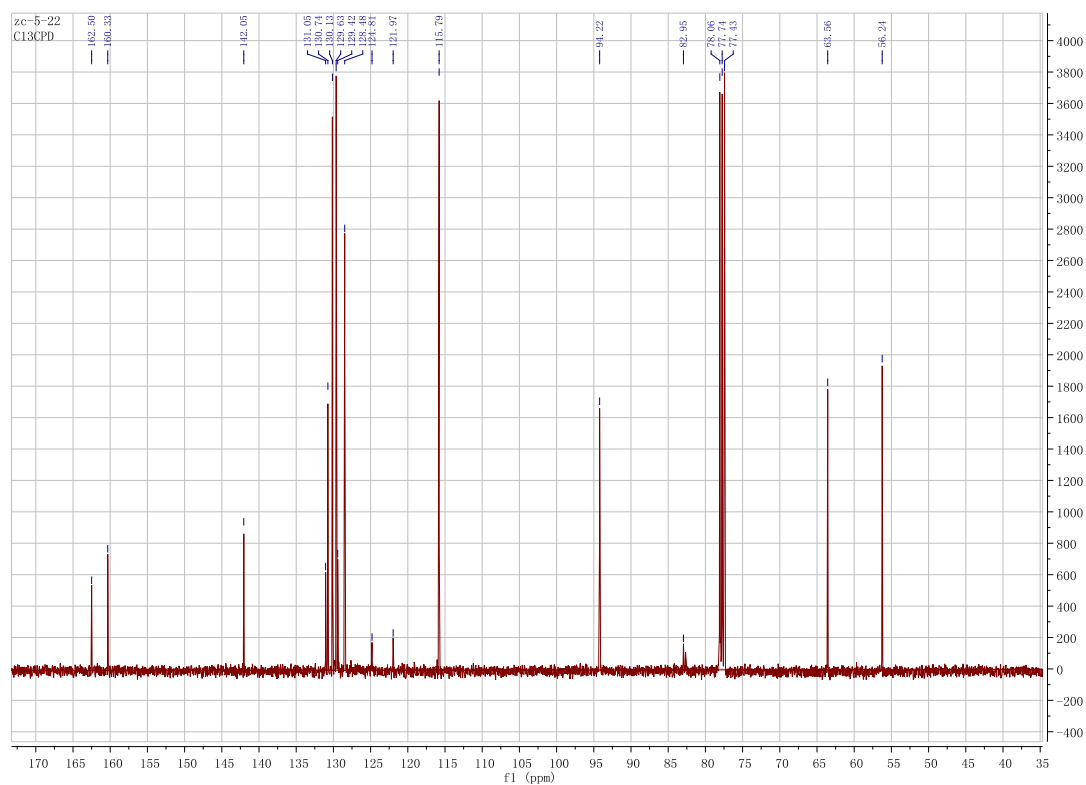

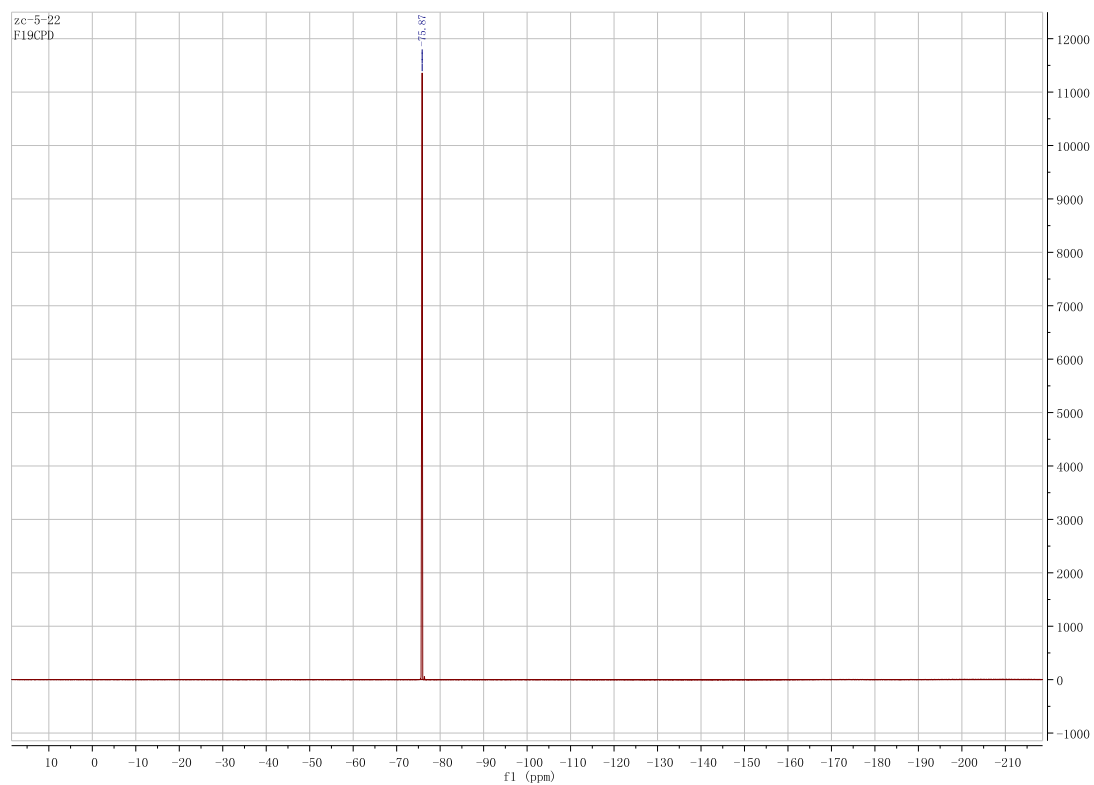

Varian QFT-ESI  
File: zc-5-22\_ESI.trans

Mode: Positive  
Scans: 1

Date: 19-JUN-2012  
Time: 15:33:43  
Scale: 1.0897

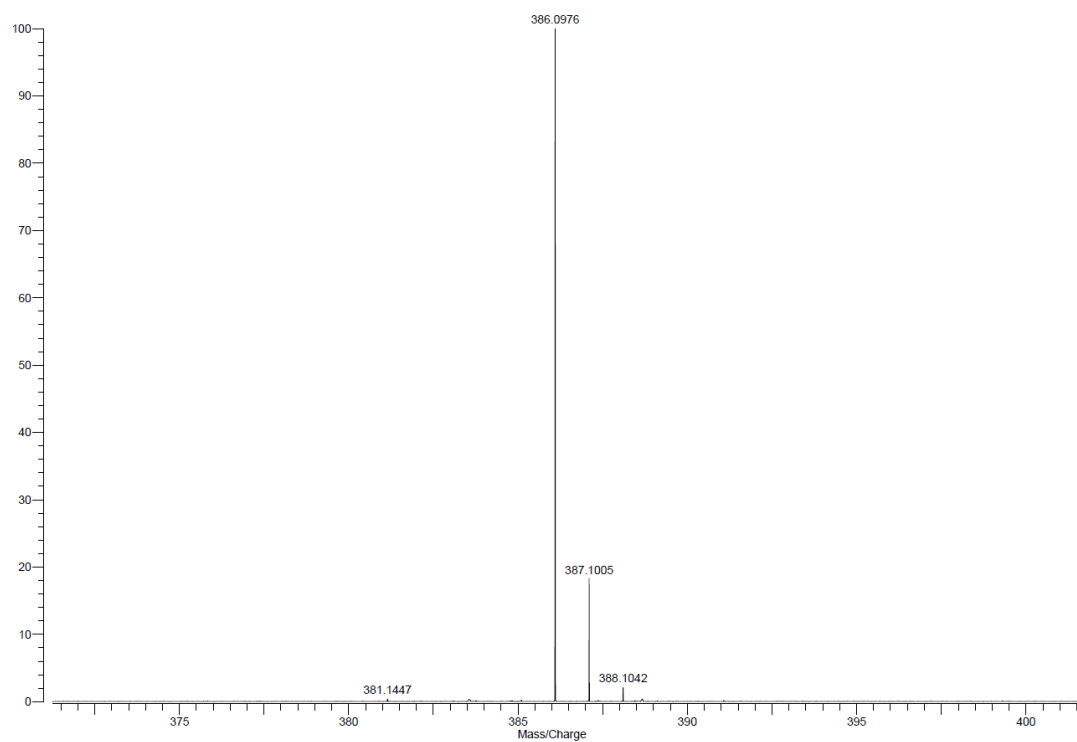

3g

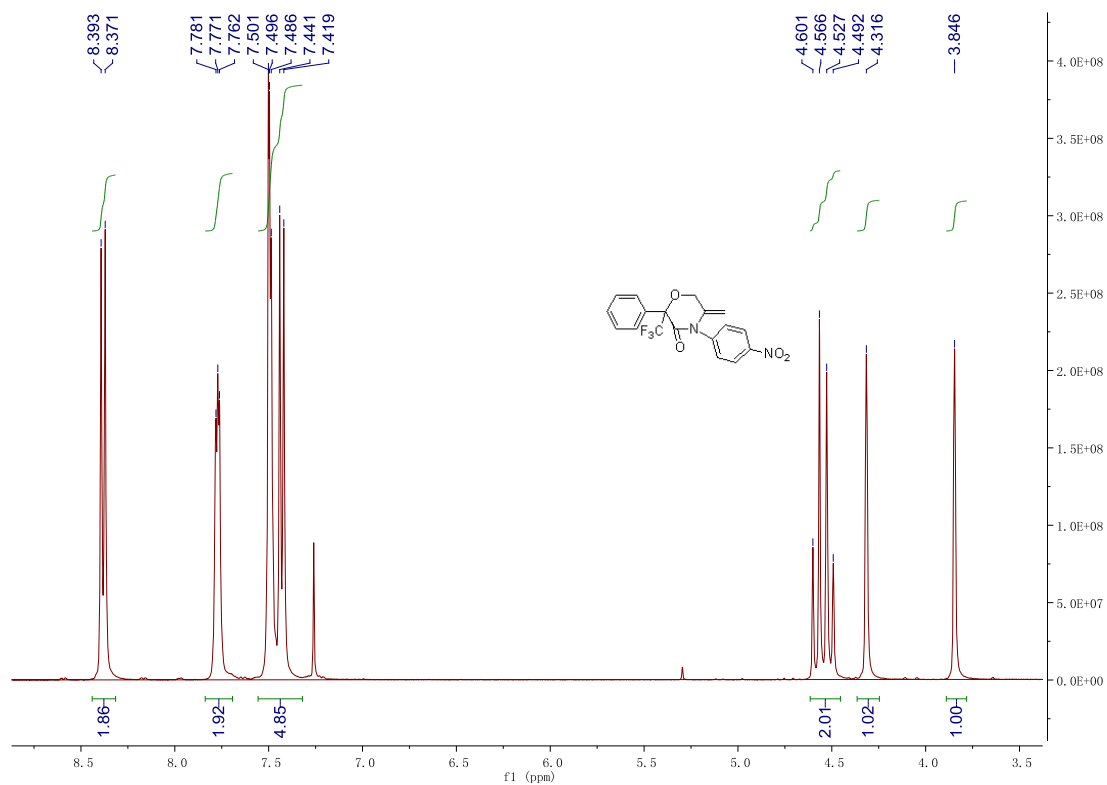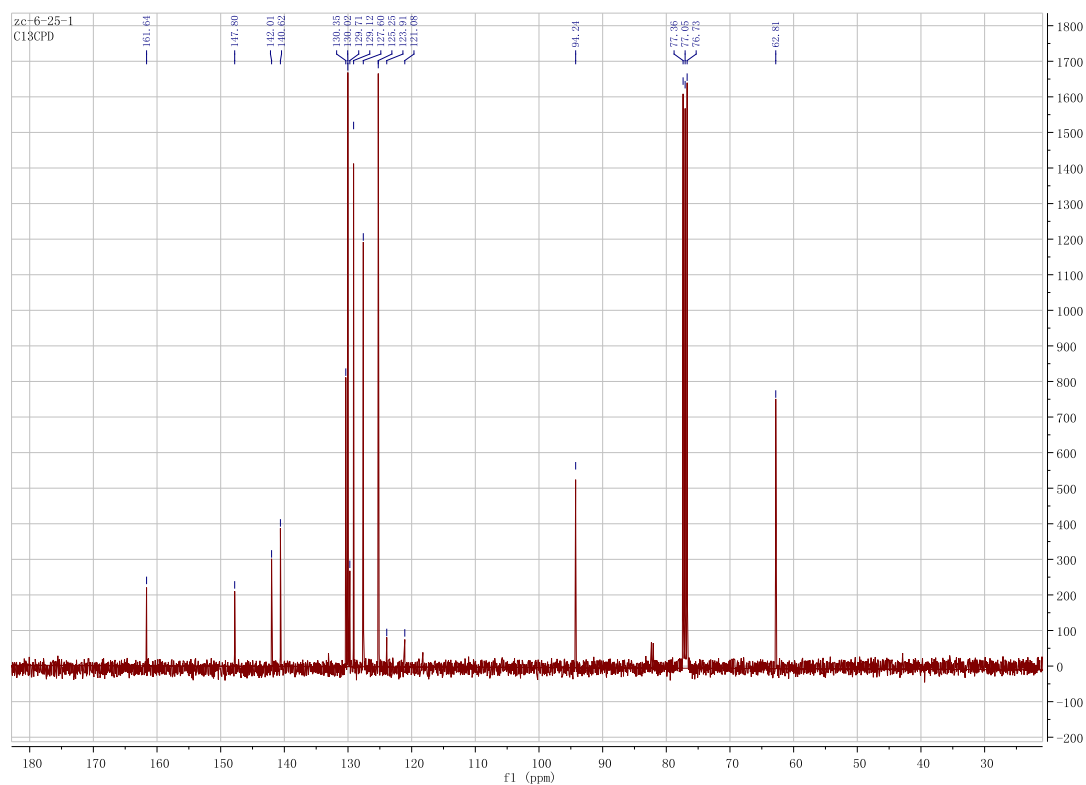



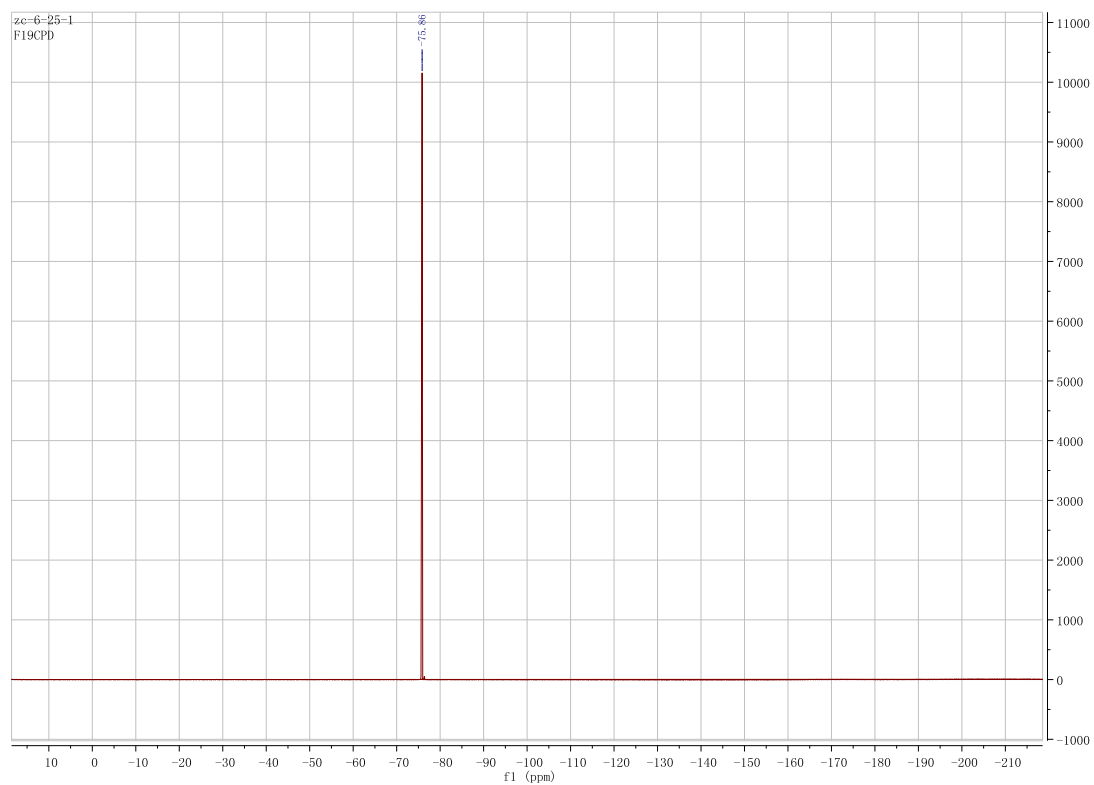

Varian QFT-ESI  
File: ZC-6-25\_ESI.trans

Mode: Positive  
Scans: 1

Date: 19-JUN-2012  
Time: 16:23:35  
Scale: 99.2847

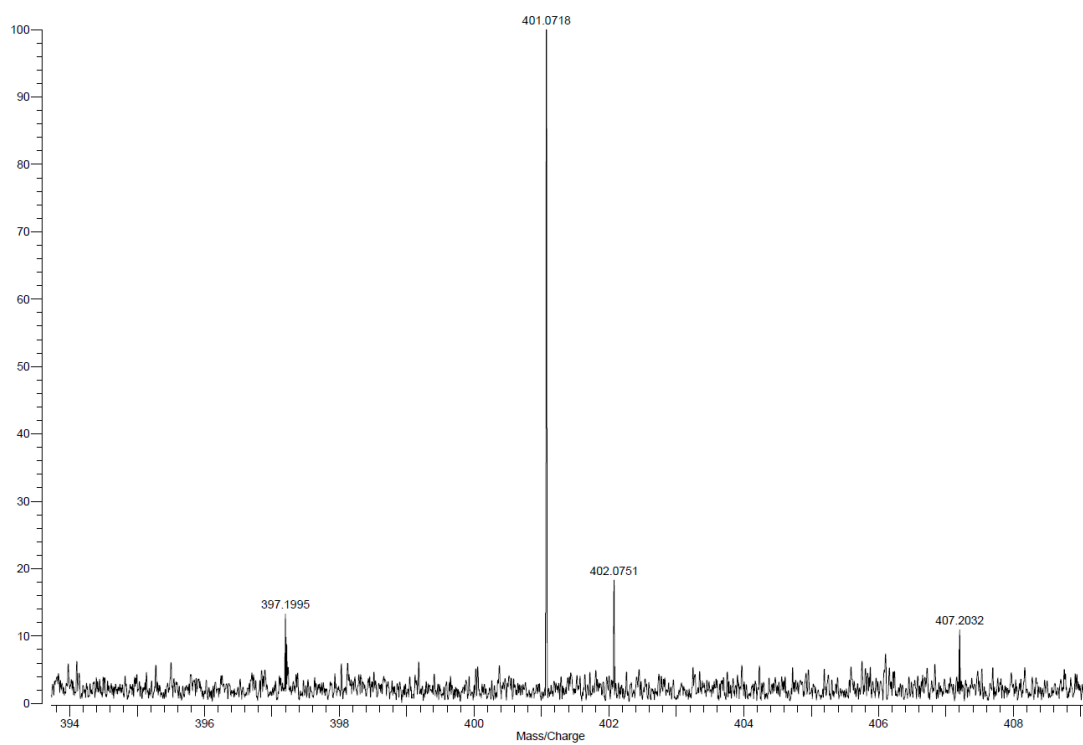

3h

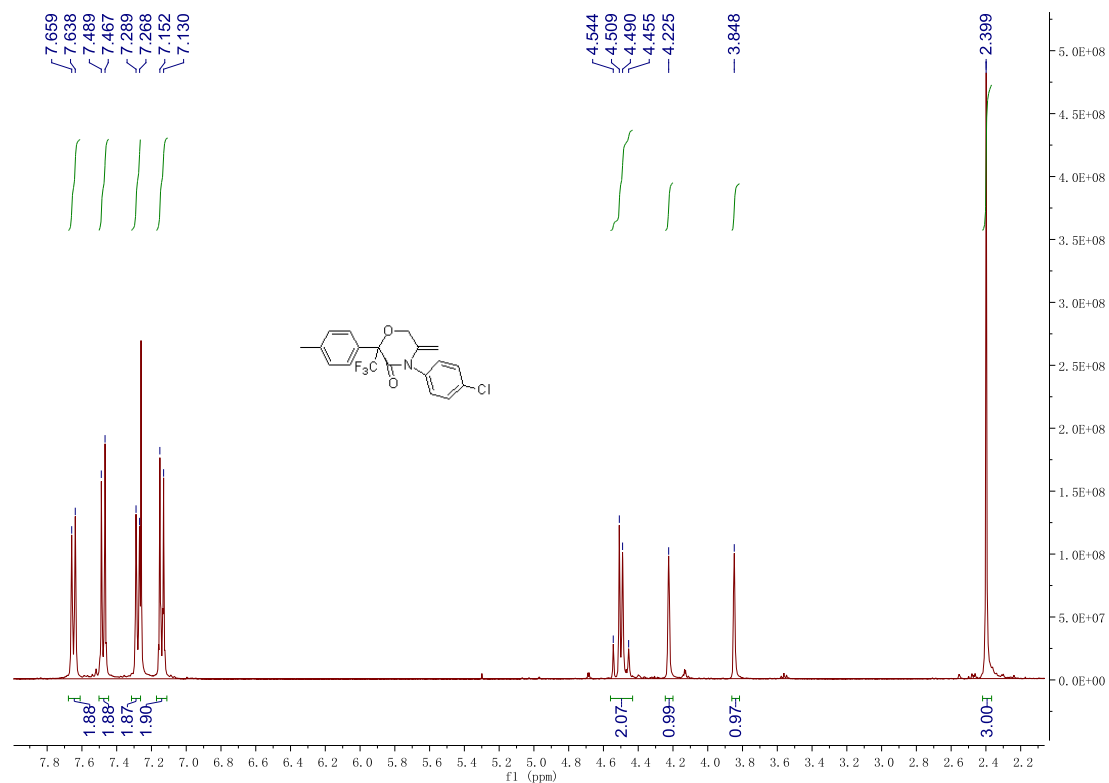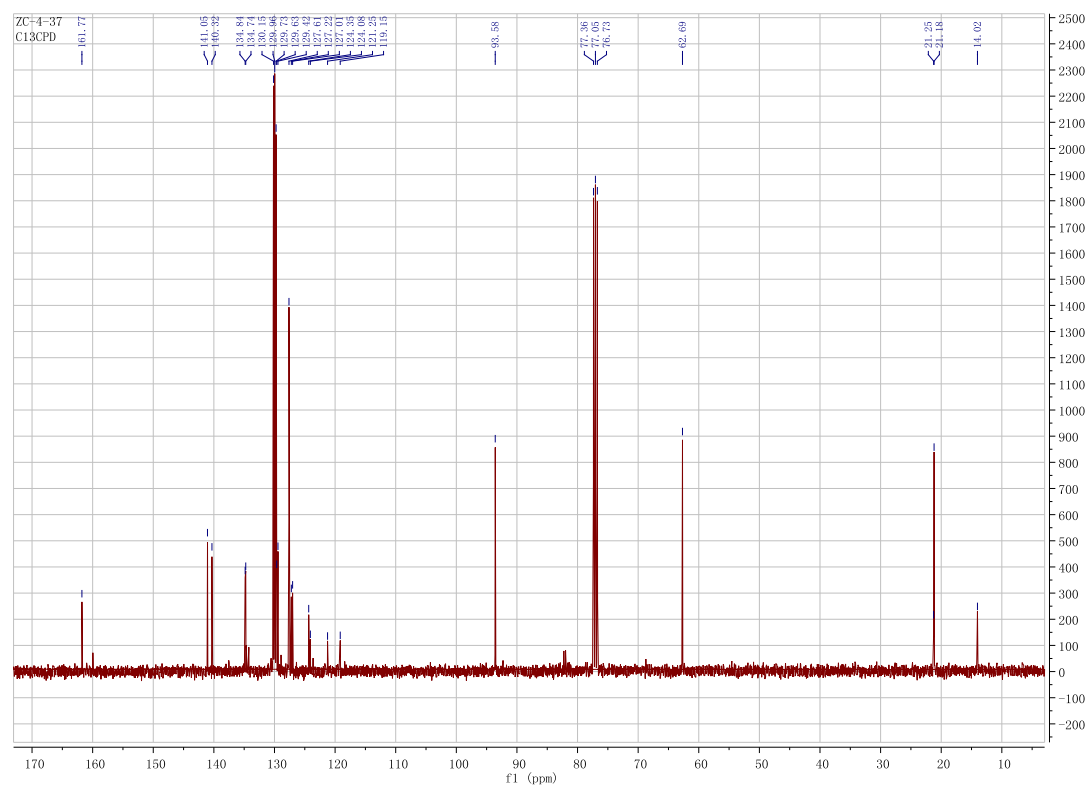

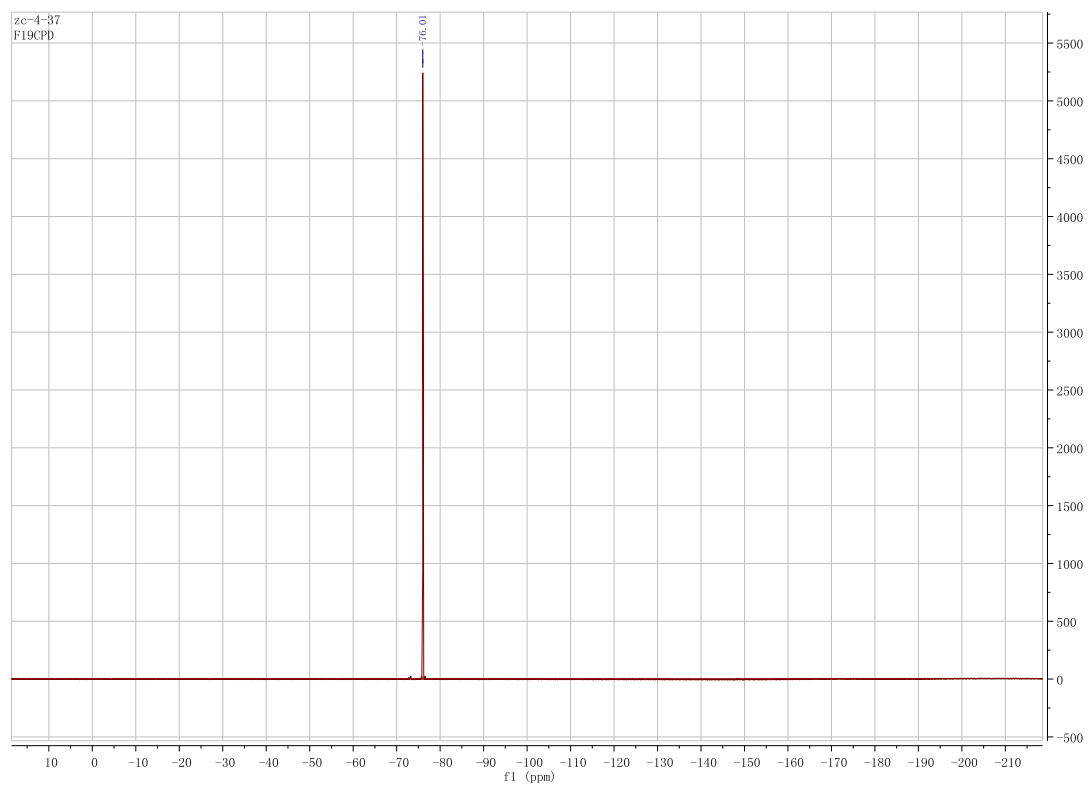

Varian QFT-ESI  
File: Zc-4-37\_ESI.trans

Mode: Positive  
Scans: 1

Date: 13-JUN-2012  
Time: 17:18:40  
Scale: 5.6996

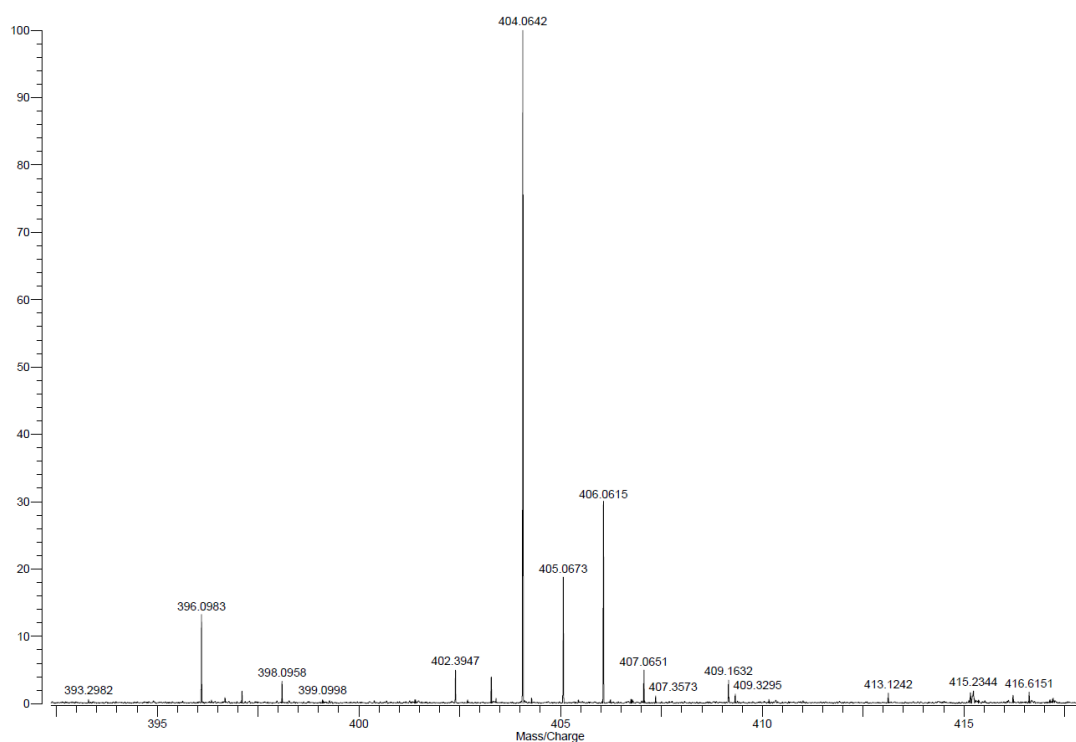

3i

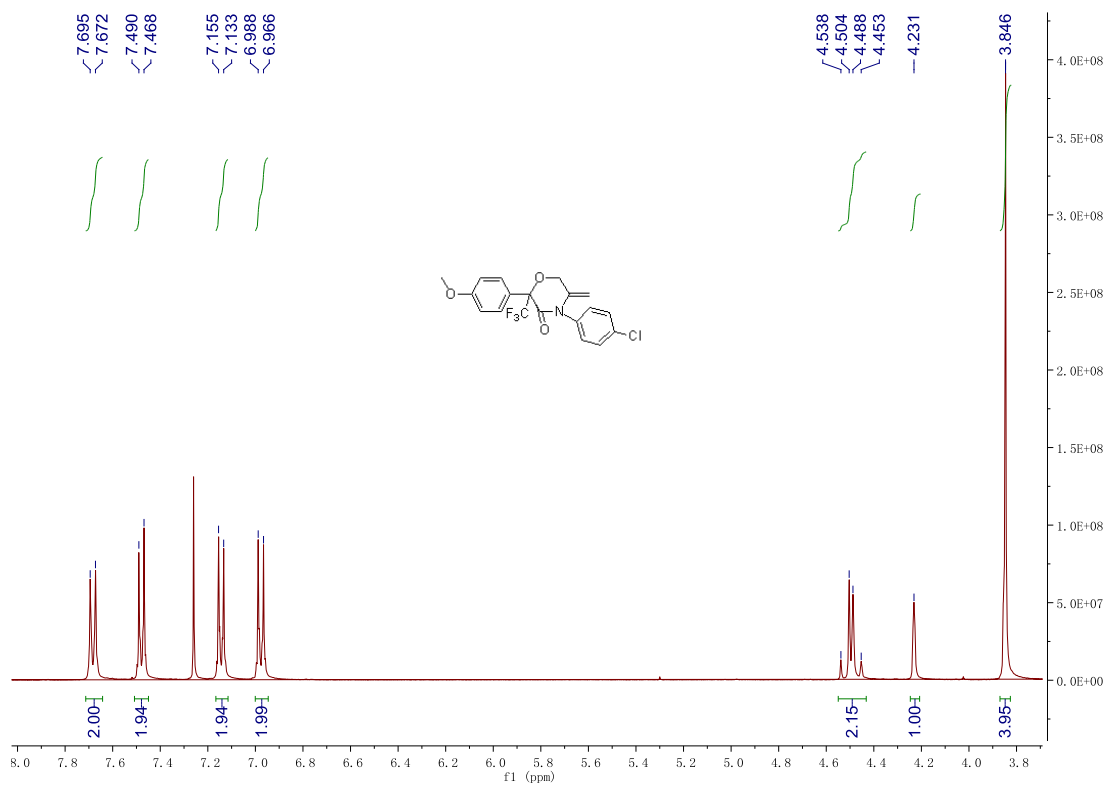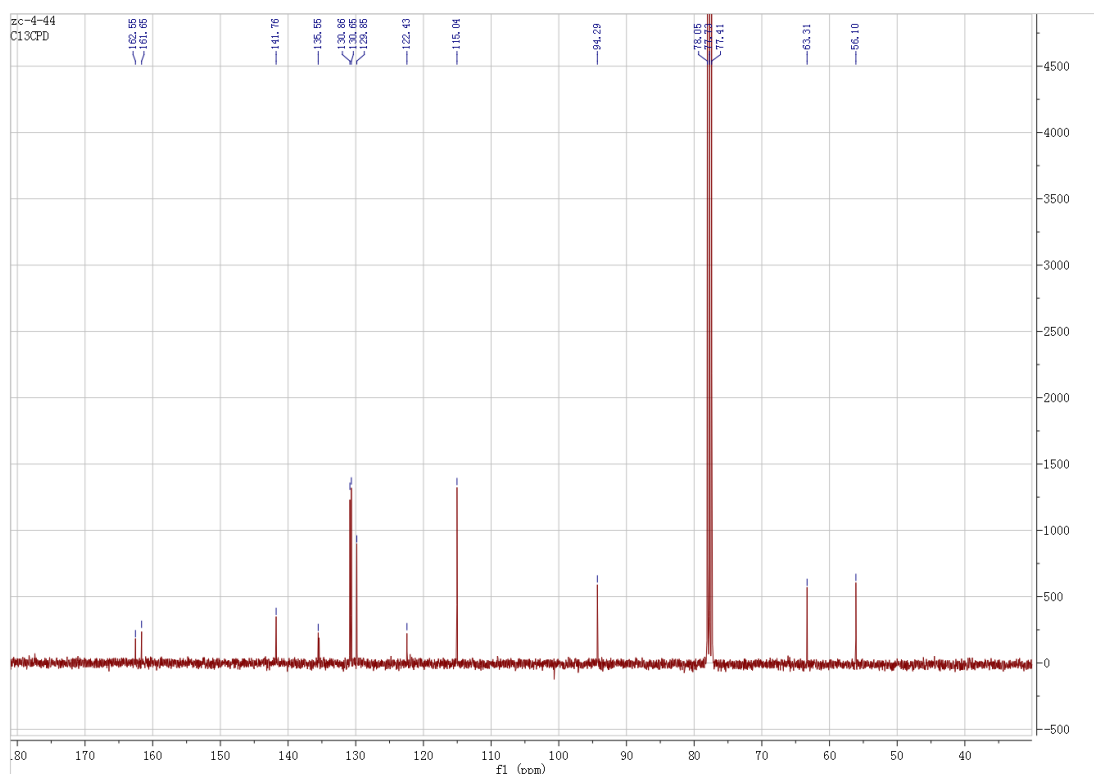



Varian QFT-ESI  
File: 2C-4-44\_ESI.trans

Mode: Positive  
Scans: 1

Date: 13-JUN-2012  
Time: 17:53:16  
Scale: 4.4698

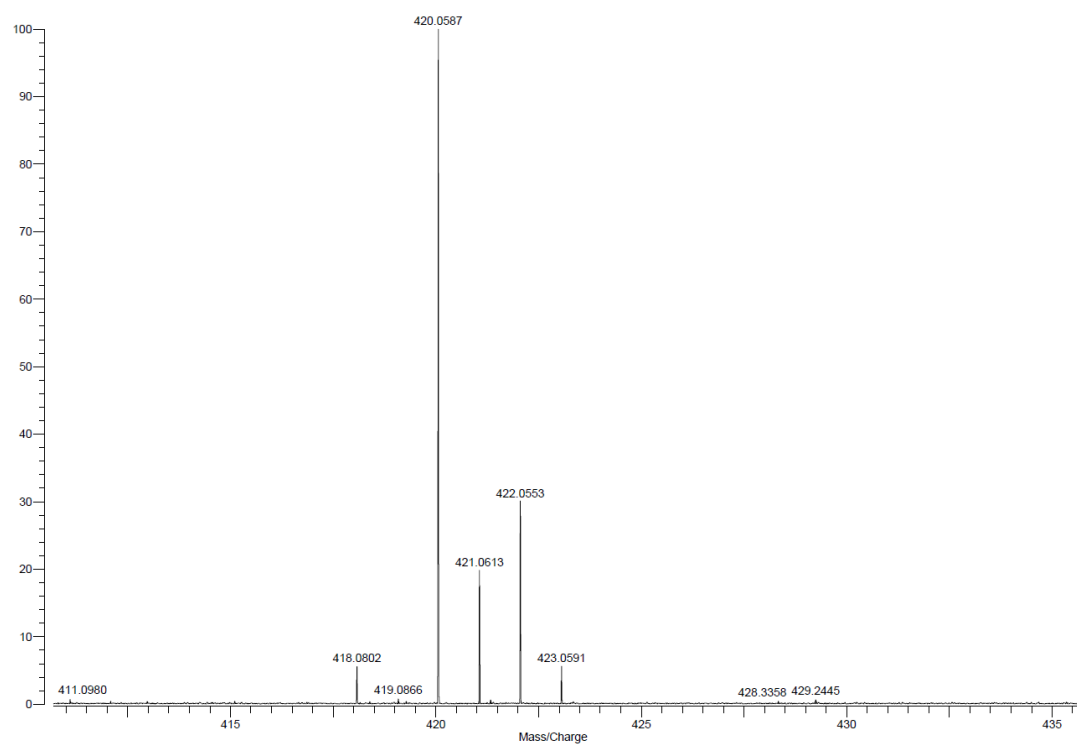

<sup>1</sup>H NMR spectrum of compound 10 in CDCl<sub>3</sub>. The spectrum shows peaks in the aromatic region (7.1-7.7 ppm) and aliphatic region (2.6-4.5 ppm). Integration values are provided below the peaks.

| Chemical Shift (ppm) | Integration |
|----------------------|-------------|
| 7.685                | 1.74        |
| 7.665                | 1.72        |
| 7.491                | 1.94        |
| 7.469                | 1.76        |
| 7.311                |             |
| 7.290                |             |
| 7.260                |             |
| 7.157                |             |
| 7.136                |             |
| 4.512                | 0.89        |
| 4.500                | 0.86        |
| 4.226                | 0.88        |
| 3.849                | 0.87        |
| 2.728                | 2.00        |
| 2.709                |             |
| 2.690                |             |
| 2.671                |             |

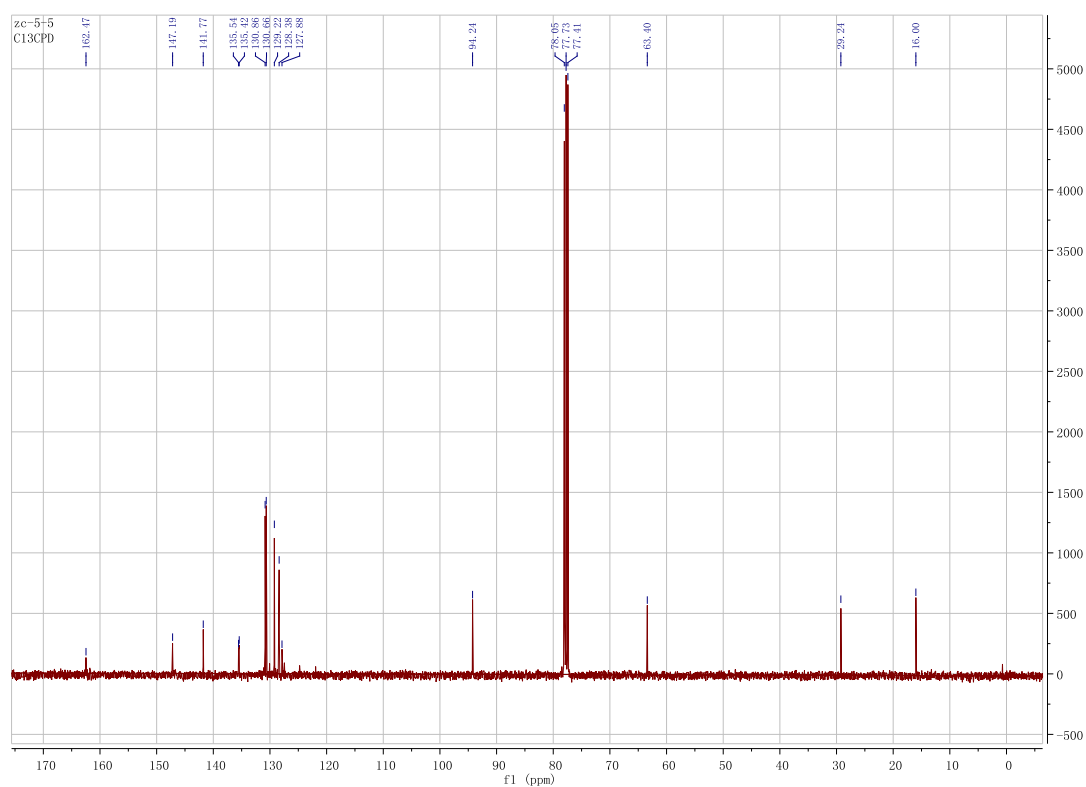

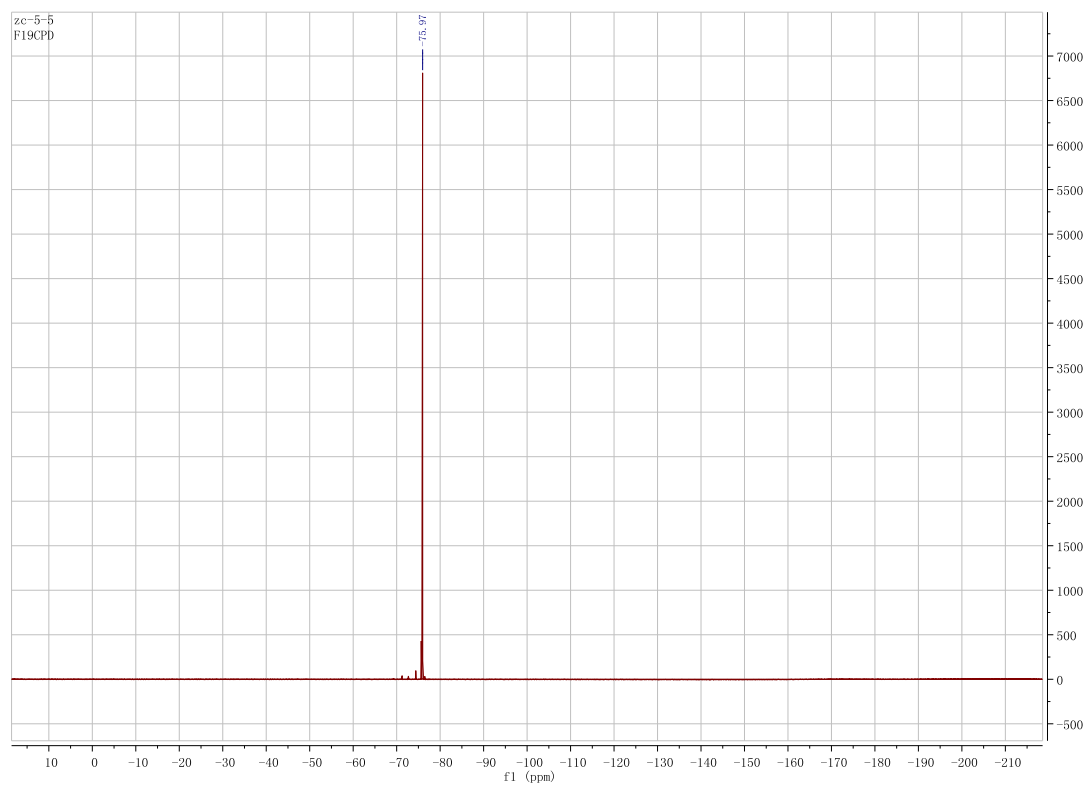

Varian QFT-ESI  
File: Zc-5-5\_ESI.trans

Mode: Positive  
Scans: 1

Date: 13-JUN-2012  
Time: 17:13:55  
Scale: 0.7743

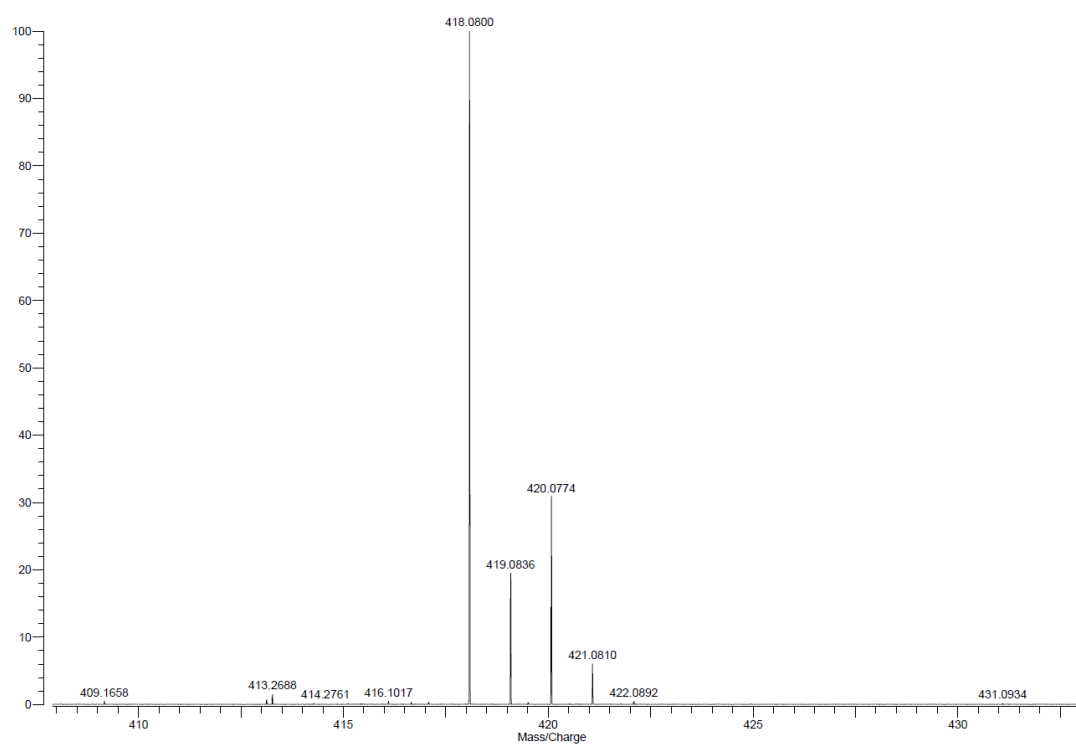

3k

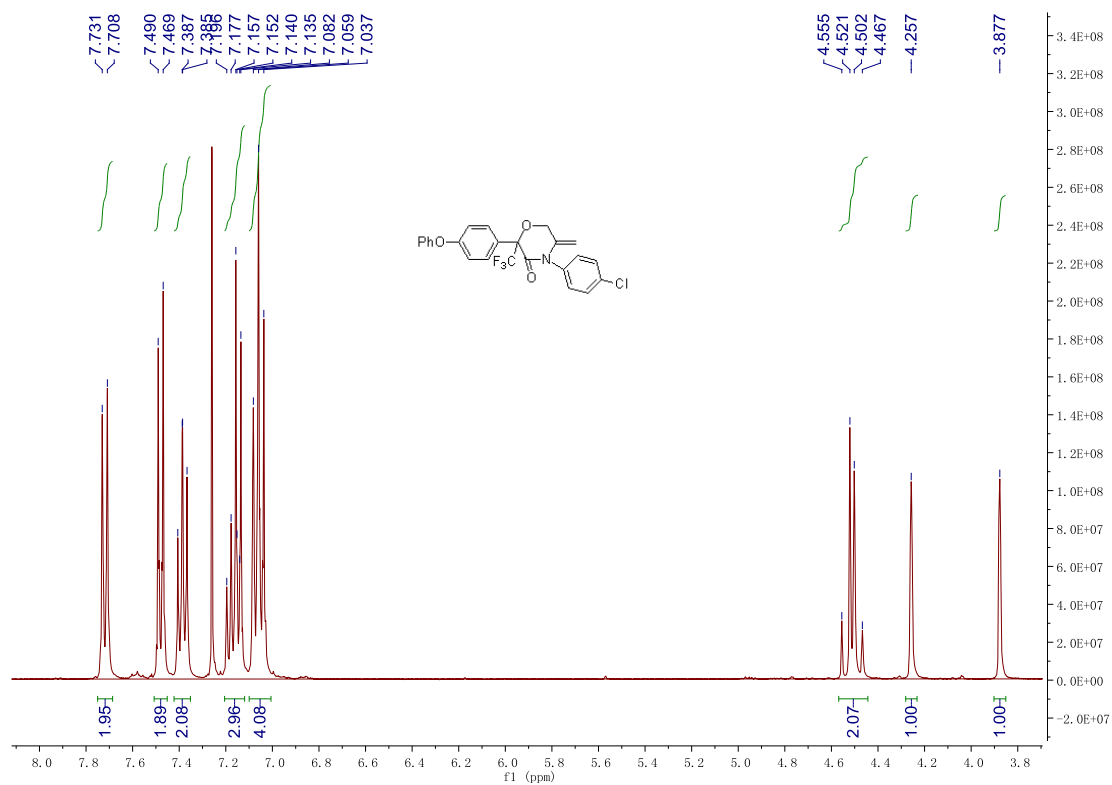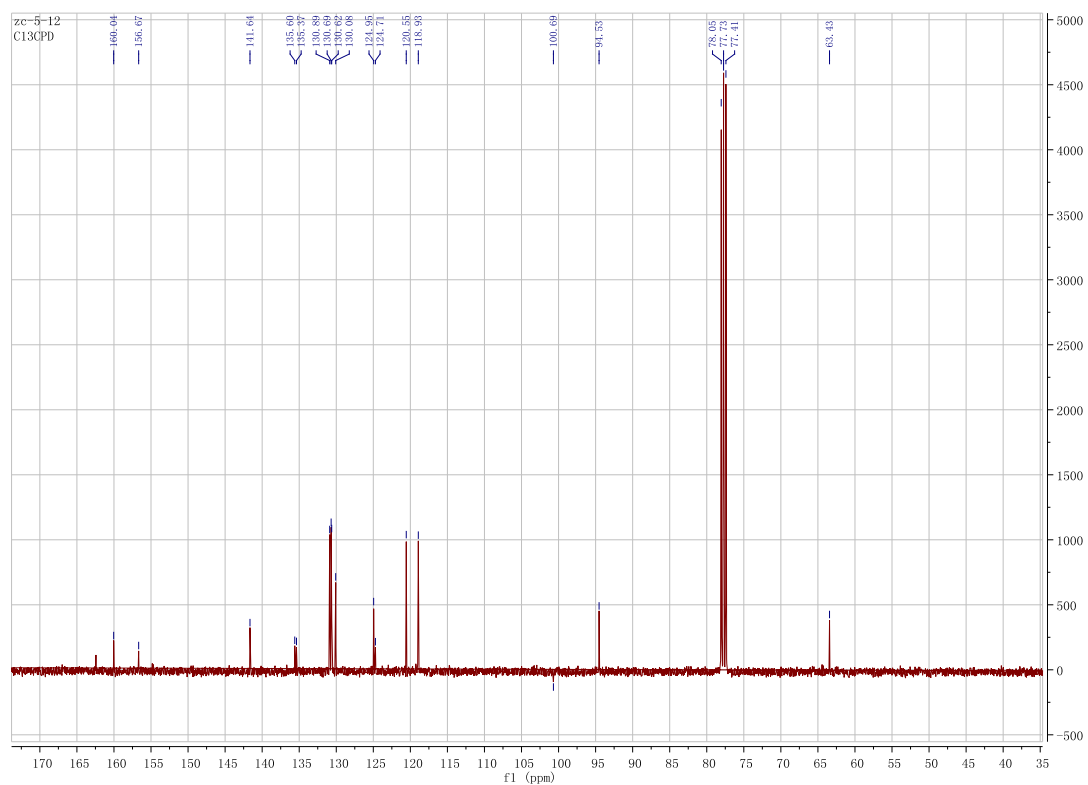



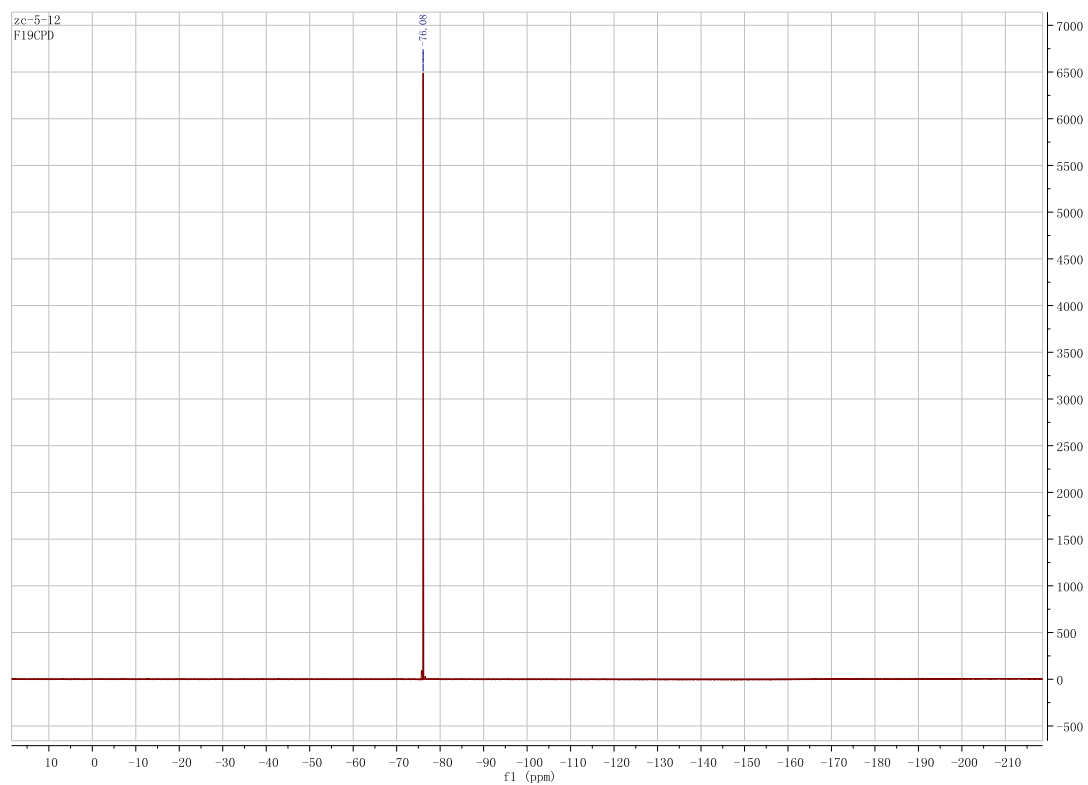

Varian QFT-ESI  
File: Zc-5-12\_ESI.trans

Mode: Positive  
Scans: 1

Date: 13-JUN-2012  
Time: 17:49:14  
Scale: 4.2479

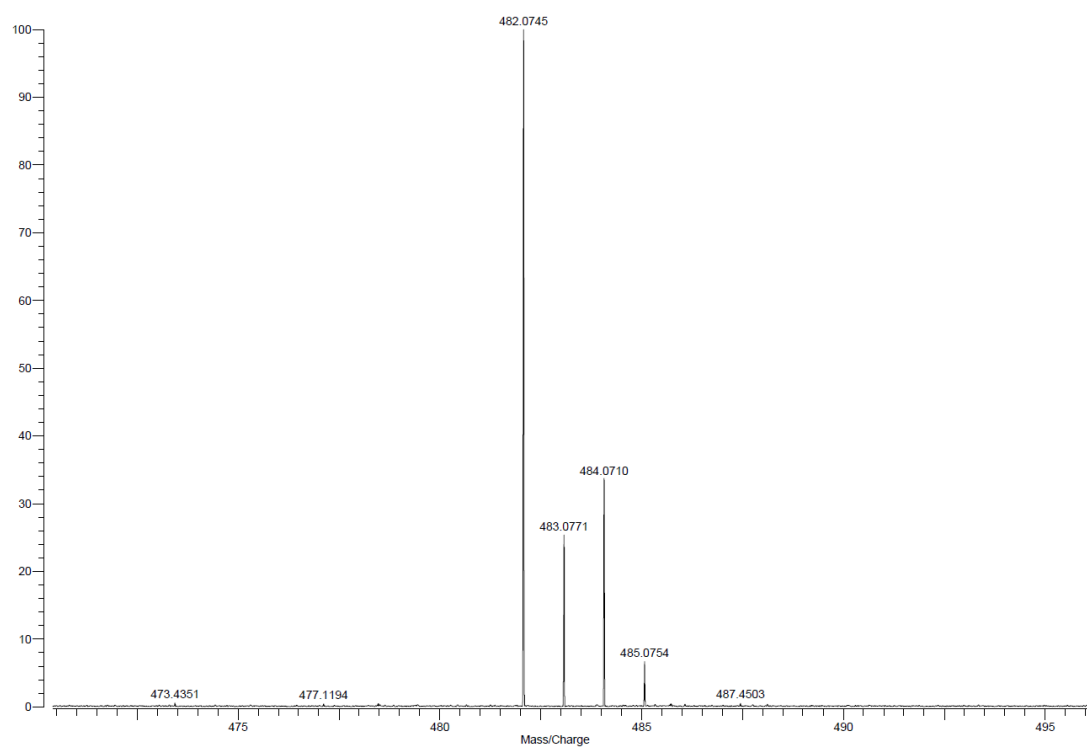

31

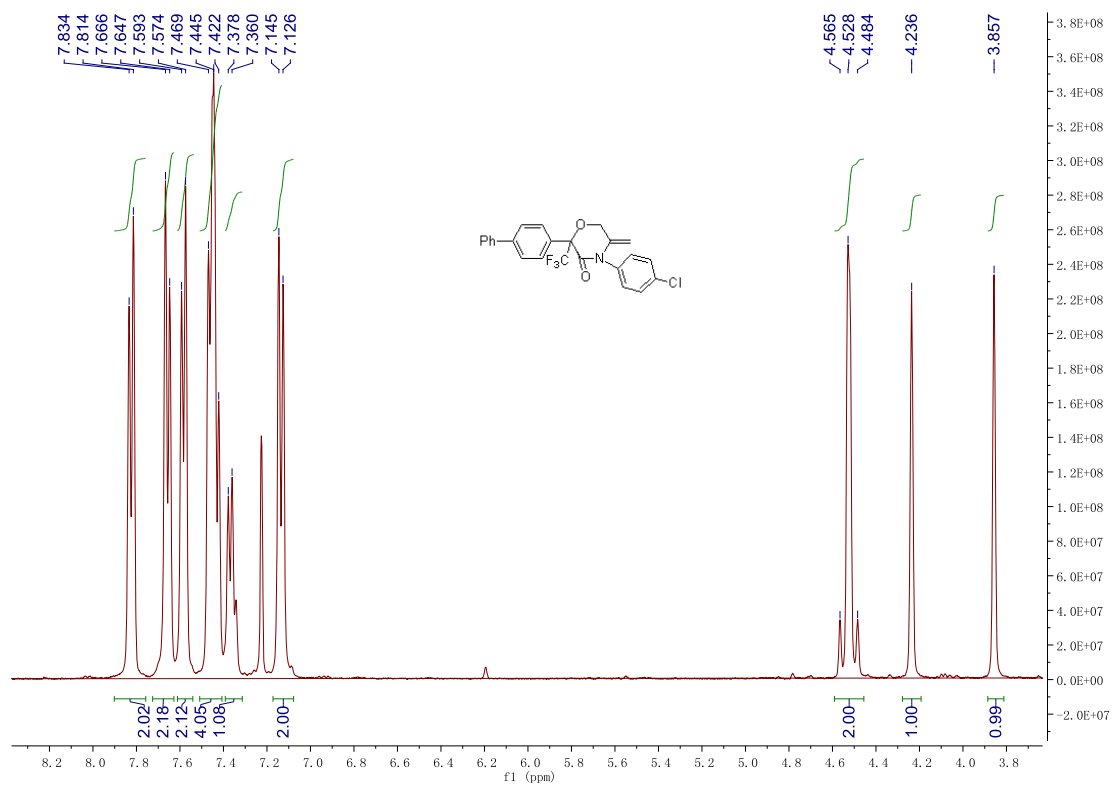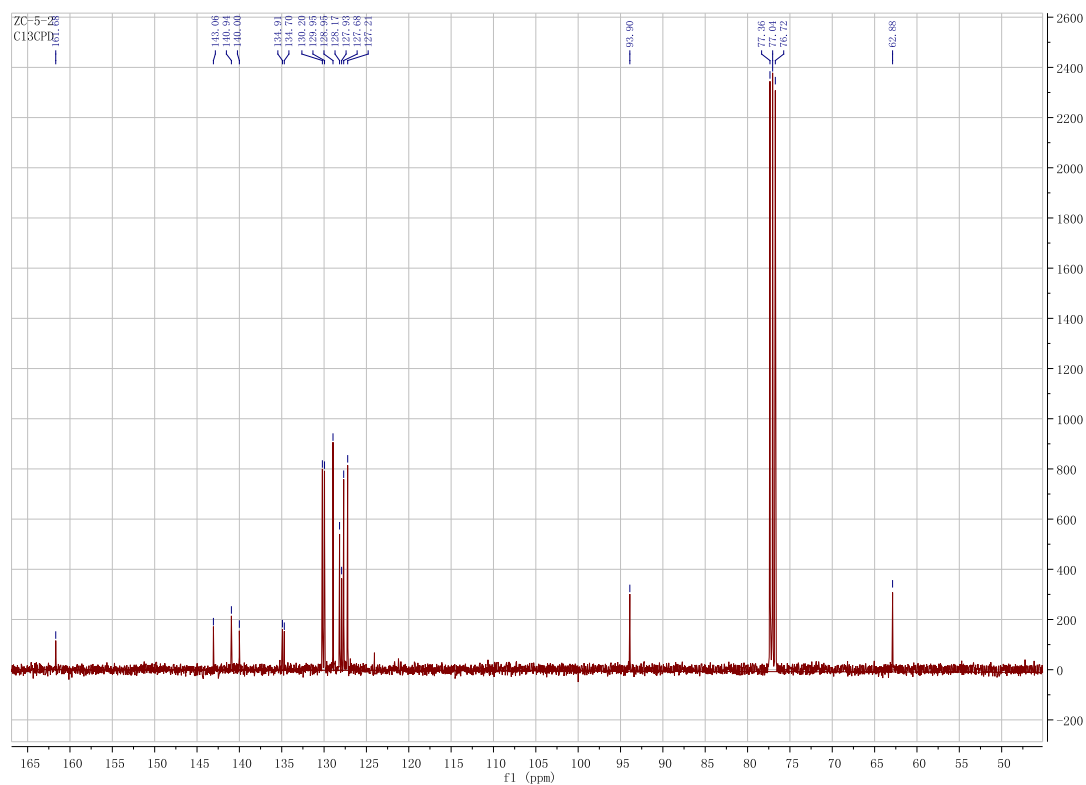

42

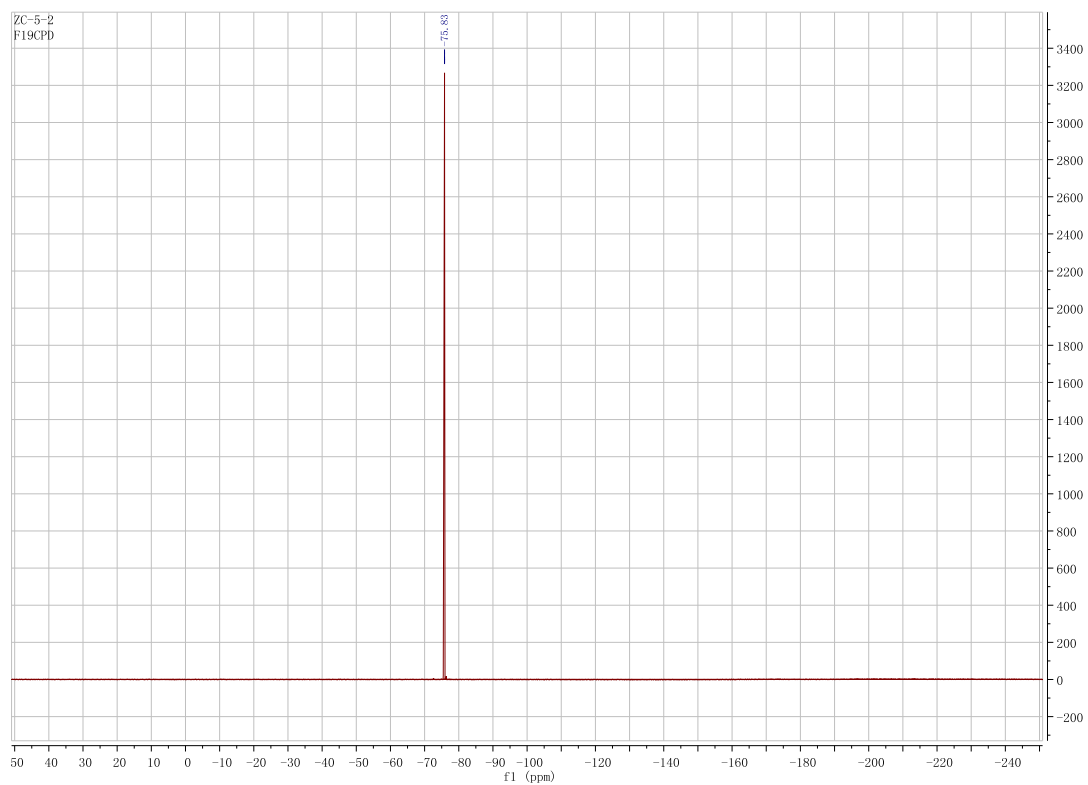

Varian QFT-ESI  
File: Zc-5-2\_ESI.trans

Mode: Positive  
Scans: 1  
Date: 13-JUN-2012  
Time: 17:56:22  
Scale: 7.6837

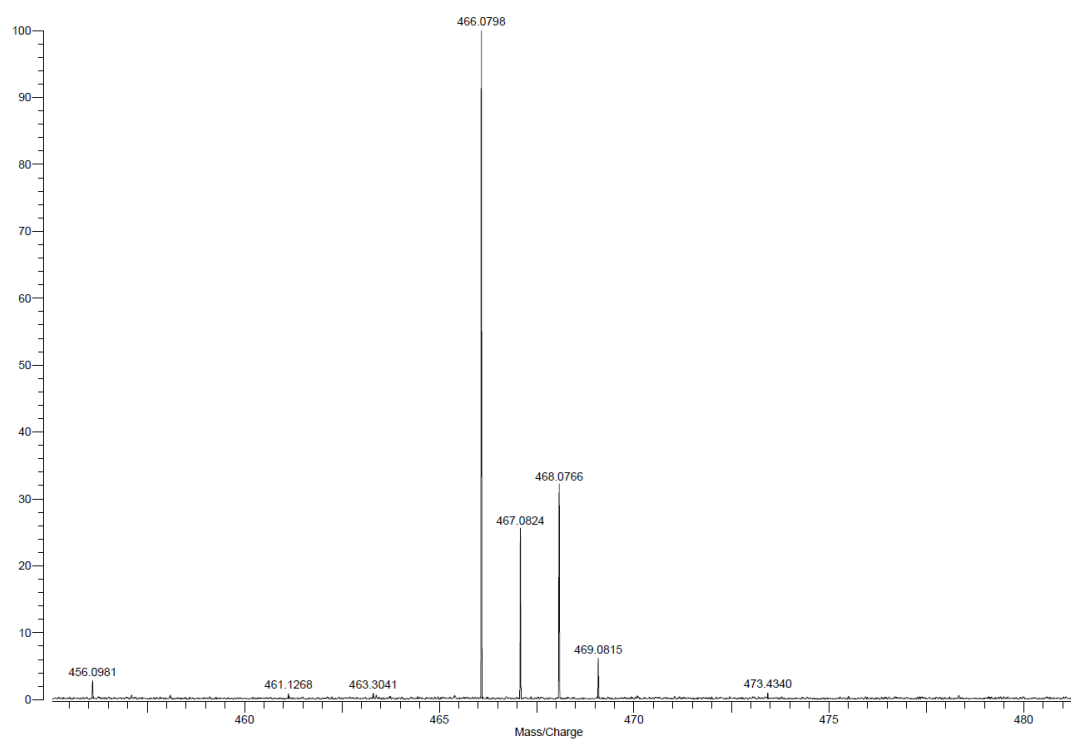

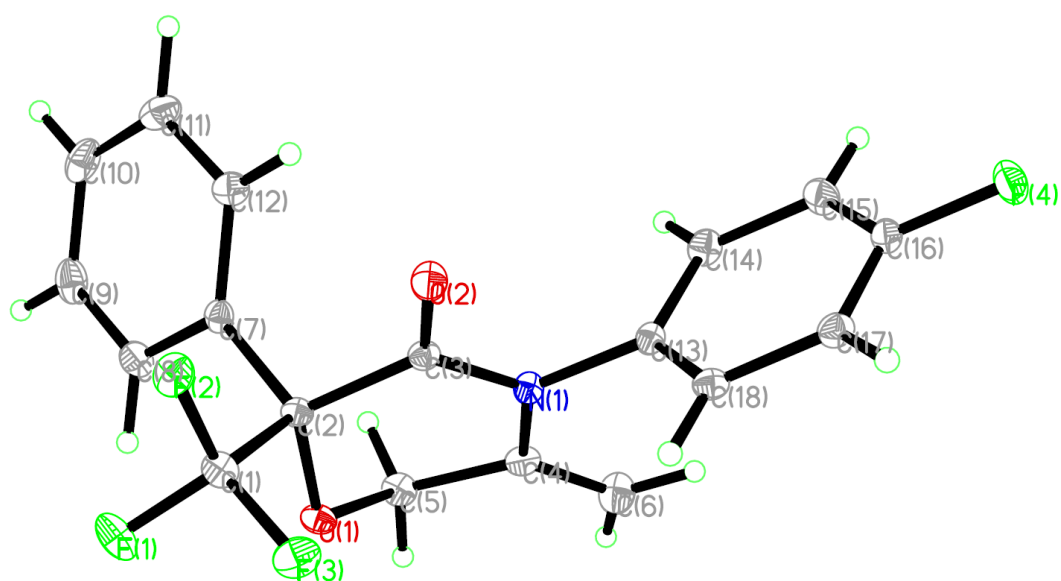

Table 1. Crystal data and structure refinement for 3a.

|                                   |                                                                                                                      |
|-----------------------------------|----------------------------------------------------------------------------------------------------------------------|
| Identification code               | m130413e1                                                                                                            |
| Empirical formula                 | C <sub>18</sub> H <sub>13</sub> F <sub>4</sub> N O <sub>2</sub>                                                      |
| Formula weight                    | 351.29                                                                                                               |
| Temperature                       | 113(2) K                                                                                                             |
| Wavelength                        | 0.71073 Å                                                                                                            |
| Crystal system, space group       | Triclinic, P-1                                                                                                       |
| Unit cell dimensions              | a = 12.353(7) Å    alpha = 90 deg.<br>b = 9.575(7) Å    beta = 106.332(8) deg.<br>c = 13.866(7) Å    gamma = 90 deg. |
| Volume                            | 1573.9(17) Å <sup>3</sup>                                                                                            |
| Z, Calculated density             | 4, 1.483 Mg/m <sup>3</sup>                                                                                           |
| Absorption coefficient            | 0.129 mm <sup>-1</sup>                                                                                               |
| F(000)                            | 720                                                                                                                  |
| Crystal size                      | 0.20 x 0.18 x 0.12 mm                                                                                                |
| Theta range for data collection   | 1.72 to 27.95 deg.                                                                                                   |
| Limiting indices                  | -16 ≤ h ≤ 16, -12 ≤ k ≤ 12, -18 ≤ l ≤ 18                                                                             |
| Reflections collected / unique    | 18292 / 3755 [R(int) = 0.0471]                                                                                       |
| Completeness to theta = 27.95     | 99.1 %                                                                                                               |
| Absorption correction             | Semi-empirical from equivalents                                                                                      |
| Max. and min. transmission        | 0.9847 and 0.9748                                                                                                    |
| Refinement method                 | Full-matrix least-squares on F <sup>2</sup>                                                                          |
| Data / restraints / parameters    | 3755 / 0 / 226                                                                                                       |
| Goodness-of-fit on F <sup>2</sup> | 0.993                                                                                                                |
| Final R indices [I > 2σ(I)]       | R1 = 0.0360, wR2 = 0.0933                                                                                            |
| R indices (all data)              | R1 = 0.0454, wR2 = 0.0986                                                                                            |

Largest diff. peak and hole                      0.255 and -0.289 e.Å<sup>-3</sup>

Table 2. Atomic coordinates ( x 10<sup>4</sup>) and equivalent isotropic displacement parameters (Å<sup>2</sup> x 10<sup>3</sup>) for 3a.

U(eq) is defined as one third of the trace of the orthogonalized Uij tensor.

|       | x        | y        | z       | U(eq) |
|-------|----------|----------|---------|-------|
| F(1)  | 4440(1)  | 4300(1)  | 4035(1) | 32(1) |
| F(2)  | 3744(1)  | 3584(1)  | 5209(1) | 27(1) |
| F(3)  | 2950(1)  | 5287(1)  | 4242(1) | 29(1) |
| F(4)  | -3441(1) | 3073(1)  | 3844(1) | 31(1) |
| O(1)  | 2655(1)  | 3680(1)  | 2568(1) | 20(1) |
| O(2)  | 1507(1)  | 2821(1)  | 4570(1) | 25(1) |
| N(1)  | 633(1)   | 3075(1)  | 2904(1) | 18(1) |
| C(1)  | 3477(1)  | 4052(1)  | 4263(1) | 22(1) |
| C(2)  | 2733(1)  | 3021(1)  | 3505(1) | 18(1) |
| C(3)  | 1573(1)  | 2955(1)  | 3712(1) | 18(1) |
| C(4)  | 669(1)   | 3179(1)  | 1887(1) | 21(1) |
| C(5)  | 1828(1)  | 3003(1)  | 1765(1) | 23(1) |
| C(6)  | -242(1)  | 3379(2)  | 1116(1) | 31(1) |
| C(7)  | 3301(1)  | 1580(1)  | 3585(1) | 20(1) |
| C(8)  | 4120(1)  | 1362(1)  | 3084(1) | 27(1) |
| C(9)  | 4651(1)  | 77(2)    | 3134(1) | 33(1) |
| C(10) | 4375(1)  | -1002(1) | 3689(1) | 33(1) |
| C(11) | 3575(1)  | -795(1)  | 4192(1) | 32(1) |
| C(12) | 3033(1)  | 491(1)   | 4145(1) | 25(1) |
| C(13) | -447(1)  | 3086(1)  | 3134(1) | 19(1) |
| C(14) | -1159(1) | 1944(1)  | 2878(1) | 23(1) |
| C(15) | -2182(1) | 1942(1)  | 3112(1) | 26(1) |
| C(16) | -2443(1) | 3078(1)  | 3609(1) | 22(1) |
| C(17) | -1745(1) | 4219(1)  | 3885(1) | 22(1) |
| C(18) | -729(1)  | 4225(1)  | 3632(1) | 21(1) |

Table 3. Bond lengths [Å] and angles [deg] for 3a.

|           |            |
|-----------|------------|
| F(1)-C(1) | 1.3354(14) |
| F(2)-C(1) | 1.3362(15) |
| F(3)-C(1) | 1.3461(16) |

|                 |            |
|-----------------|------------|
| F(4)-C(16)      | 1.3614(14) |
| O(1)-C(2)       | 1.4230(14) |
| O(1)-C(5)       | 1.4365(15) |
| O(2)-C(3)       | 1.2216(15) |
| N(1)-C(3)       | 1.3726(15) |
| N(1)-C(4)       | 1.4274(16) |
| N(1)-C(13)      | 1.4565(15) |
| C(1)-C(2)       | 1.5428(17) |
| C(2)-C(7)       | 1.5376(18) |
| C(2)-C(3)       | 1.5411(17) |
| C(4)-C(6)       | 1.3296(18) |
| C(4)-C(5)       | 1.4974(18) |
| C(5)-H(5A)      | 0.9900     |
| C(5)-H(5B)      | 0.9900     |
| C(6)-H(6A)      | 0.9500     |
| C(6)-H(6B)      | 0.9500     |
| C(7)-C(12)      | 1.3943(18) |
| C(7)-C(8)       | 1.3953(17) |
| C(8)-C(9)       | 1.387(2)   |
| C(8)-H(8)       | 0.9500     |
| C(9)-C(10)      | 1.386(2)   |
| C(9)-H(9)       | 0.9500     |
| C(10)-C(11)     | 1.3759(19) |
| C(10)-H(10)     | 0.9500     |
| C(11)-C(12)     | 1.3945(19) |
| C(11)-H(11)     | 0.9500     |
| C(12)-H(12)     | 0.9500     |
| C(13)-C(14)     | 1.3854(17) |
| C(13)-C(18)     | 1.3871(17) |
| C(14)-C(15)     | 1.3899(17) |
| C(14)-H(14)     | 0.9500     |
| C(15)-C(16)     | 1.3736(18) |
| C(15)-H(15)     | 0.9500     |
| C(16)-C(17)     | 1.3771(18) |
| C(17)-C(18)     | 1.3945(17) |
| C(17)-H(17)     | 0.9500     |
| C(18)-H(18)     | 0.9500     |
| C(2)-O(1)-C(5)  | 110.98(9)  |
| C(3)-N(1)-C(4)  | 123.97(10) |
| C(3)-N(1)-C(13) | 116.03(10) |
| C(4)-N(1)-C(13) | 120.00(9)  |
| F(1)-C(1)-F(2)  | 107.56(10) |
| F(1)-C(1)-F(3)  | 107.18(10) |

|                   |            |
|-------------------|------------|
| F(2)-C(1)-F(3)    | 107.51(9)  |
| F(1)-C(1)-C(2)    | 110.59(9)  |
| F(2)-C(1)-C(2)    | 112.96(10) |
| F(3)-C(1)-C(2)    | 110.80(10) |
| O(1)-C(2)-C(7)    | 112.15(9)  |
| O(1)-C(2)-C(3)    | 111.13(9)  |
| C(7)-C(2)-C(3)    | 112.24(9)  |
| O(1)-C(2)-C(1)    | 102.33(9)  |
| C(7)-C(2)-C(1)    | 110.66(10) |
| C(3)-C(2)-C(1)    | 107.81(9)  |
| O(2)-C(3)-N(1)    | 122.09(11) |
| O(2)-C(3)-C(2)    | 120.41(10) |
| N(1)-C(3)-C(2)    | 117.50(10) |
| C(6)-C(4)-N(1)    | 123.40(12) |
| C(6)-C(4)-C(5)    | 123.04(11) |
| N(1)-C(4)-C(5)    | 113.54(10) |
| O(1)-C(5)-C(4)    | 110.86(10) |
| O(1)-C(5)-H(5A)   | 109.5      |
| C(4)-C(5)-H(5A)   | 109.5      |
| O(1)-C(5)-H(5B)   | 109.5      |
| C(4)-C(5)-H(5B)   | 109.5      |
| H(5A)-C(5)-H(5B)  | 108.1      |
| C(4)-C(6)-H(6A)   | 120.0      |
| C(4)-C(6)-H(6B)   | 120.0      |
| H(6A)-C(6)-H(6B)  | 120.0      |
| C(12)-C(7)-C(8)   | 119.01(11) |
| C(12)-C(7)-C(2)   | 122.47(11) |
| C(8)-C(7)-C(2)    | 118.52(10) |
| C(9)-C(8)-C(7)    | 120.40(12) |
| C(9)-C(8)-H(8)    | 119.8      |
| C(7)-C(8)-H(8)    | 119.8      |
| C(10)-C(9)-C(8)   | 120.20(13) |
| C(10)-C(9)-H(9)   | 119.9      |
| C(8)-C(9)-H(9)    | 119.9      |
| C(11)-C(10)-C(9)  | 119.87(12) |
| C(11)-C(10)-H(10) | 120.1      |
| C(9)-C(10)-H(10)  | 120.1      |
| C(10)-C(11)-C(12) | 120.49(12) |
| C(10)-C(11)-H(11) | 119.8      |
| C(12)-C(11)-H(11) | 119.8      |
| C(7)-C(12)-C(11)  | 120.03(12) |
| C(7)-C(12)-H(12)  | 120.0      |
| C(11)-C(12)-H(12) | 120.0      |

|                   |            |
|-------------------|------------|
| C(14)-C(13)-C(18) | 121.17(11) |
| C(14)-C(13)-N(1)  | 119.55(10) |
| C(18)-C(13)-N(1)  | 119.25(10) |
| C(13)-C(14)-C(15) | 119.68(11) |
| C(13)-C(14)-H(14) | 120.2      |
| C(15)-C(14)-H(14) | 120.2      |
| C(16)-C(15)-C(14) | 118.20(11) |
| C(16)-C(15)-H(15) | 120.9      |
| C(14)-C(15)-H(15) | 120.9      |
| F(4)-C(16)-C(15)  | 118.26(10) |
| F(4)-C(16)-C(17)  | 118.34(11) |
| C(15)-C(16)-C(17) | 123.40(11) |
| C(16)-C(17)-C(18) | 118.11(11) |
| C(16)-C(17)-H(17) | 120.9      |
| C(18)-C(17)-H(17) | 120.9      |
| C(13)-C(18)-C(17) | 119.43(11) |
| C(13)-C(18)-H(18) | 120.3      |
| C(17)-C(18)-H(18) | 120.3      |

---

Symmetry transformations used to generate equivalent atoms:

Table 4. Anisotropic displacement parameters ( $\text{\AA}^2 \times 10^3$ ) for 3a.

The anisotropic displacement factor exponent takes the form:

$$-2 \pi^2 [ h^2 a^{*2} U_{11} + \dots + 2 h k a^* b^* U_{12} ]$$

|      | U11   | U22   | U33   | U23    | U13   | U12    |
|------|-------|-------|-------|--------|-------|--------|
| F(1) | 27(1) | 38(1) | 34(1) | -13(1) | 13(1) | -13(1) |
| F(2) | 29(1) | 32(1) | 18(1) | -3(1)  | 1(1)  | -1(1)  |
| F(3) | 39(1) | 21(1) | 28(1) | -6(1)  | 10(1) | 2(1)   |
| F(4) | 22(1) | 36(1) | 38(1) | 0(1)   | 15(1) | -1(1)  |
| O(1) | 26(1) | 21(1) | 16(1) | 0(1)   | 8(1)  | -4(1)  |
| O(2) | 24(1) | 37(1) | 17(1) | 4(1)   | 8(1)  | 3(1)   |
| N(1) | 18(1) | 21(1) | 16(1) | -1(1)  | 6(1)  | 2(1)   |
| C(1) | 24(1) | 22(1) | 21(1) | -3(1)  | 8(1)  | -2(1)  |
| C(2) | 20(1) | 19(1) | 15(1) | 0(1)   | 6(1)  | -1(1)  |
| C(3) | 21(1) | 16(1) | 18(1) | 1(1)   | 7(1)  | 1(1)   |
| C(4) | 28(1) | 18(1) | 16(1) | -1(1)  | 7(1)  | 0(1)   |
| C(5) | 27(1) | 26(1) | 15(1) | -3(1)  | 6(1)  | -2(1)  |
| C(6) | 31(1) | 42(1) | 20(1) | 0(1)   | 6(1)  | 4(1)   |
| C(7) | 18(1) | 19(1) | 20(1) | -3(1)  | 3(1)  | 0(1)   |
| C(8) | 24(1) | 25(1) | 32(1) | -3(1)  | 10(1) | -3(1)  |
| C(9) | 22(1) | 34(1) | 41(1) | -10(1) | 9(1)  | 3(1)   |



|       |       |       |       |       |       |       |
|-------|-------|-------|-------|-------|-------|-------|
| C(10) | 32(1) | 25(1) | 35(1) | -7(1) | -2(1) | 9(1)  |
| C(11) | 40(1) | 22(1) | 30(1) | 3(1)  | 5(1)  | 2(1)  |
| C(12) | 28(1) | 24(1) | 24(1) | 0(1)  | 8(1)  | -1(1) |
| C(13) | 18(1) | 20(1) | 18(1) | 1(1)  | 4(1)  | 3(1)  |
| C(14) | 25(1) | 19(1) | 25(1) | -6(1) | 6(1)  | 2(1)  |
| C(15) | 24(1) | 22(1) | 30(1) | -4(1) | 6(1)  | -5(1) |
| C(16) | 18(1) | 25(1) | 23(1) | 4(1)  | 7(1)  | 3(1)  |
| C(17) | 27(1) | 18(1) | 23(1) | -1(1) | 10(1) | 3(1)  |
| C(18) | 24(1) | 16(1) | 22(1) | 0(1)  | 7(1)  | -1(1) |

Table 5. Hydrogen coordinates ( $\times 10^4$ ) and isotropic displacement parameters ( $\text{\AA}^2 \times 10^3$ ) for 3a.

|       | x     | y     | z    | U(eq) |
|-------|-------|-------|------|-------|
| H(5A) | 2007  | 1995  | 1761 | 27    |
| H(5B) | 1852  | 3406  | 1114 | 27    |
| H(6A) | -963  | 3460  | 1228 | 37    |
| H(6B) | -171  | 3440  | 452  | 37    |
| H(8)  | 4315  | 2099  | 2705 | 32    |
| H(9)  | 5205  | -65   | 2788 | 39    |
| H(10) | 4739  | -1882 | 3721 | 40    |
| H(11) | 3390  | -1534 | 4575 | 38    |
| H(12) | 2481  | 625   | 4495 | 30    |
| H(14) | -949  | 1167  | 2545 | 28    |
| H(15) | -2687 | 1175  | 2933 | 31    |
| H(17) | -1950 | 4979  | 4236 | 26    |
| H(18) | -235  | 5003  | 3800 | 25    |

Table 6. Torsion angles [deg] for m130413e1.

|                     |            |
|---------------------|------------|
| C(5)-O(1)-C(2)-C(7) | 71.52(12)  |
| C(5)-O(1)-C(2)-C(3) | -55.02(12) |
| C(5)-O(1)-C(2)-C(1) | -169.86(9) |
| F(1)-C(1)-C(2)-O(1) | -54.28(12) |
| F(2)-C(1)-C(2)-O(1) | -174.89(9) |
| F(3)-C(1)-C(2)-O(1) | 64.42(11)  |
| F(1)-C(1)-C(2)-C(7) | 65.39(12)  |
| F(2)-C(1)-C(2)-C(7) | -55.22(12) |
| F(3)-C(1)-C(2)-C(7) | -175.92(9) |
| F(1)-C(1)-C(2)-C(3) | -171.52(9) |

|                         |             |
|-------------------------|-------------|
| F(2)-C(1)-C(2)-C(3)     | 67.87(12)   |
| F(3)-C(1)-C(2)-C(3)     | -52.82(12)  |
| C(4)-N(1)-C(3)-O(2)     | -177.48(11) |
| C(13)-N(1)-C(3)-O(2)    | 2.22(16)    |
| C(4)-N(1)-C(3)-C(2)     | 3.59(15)    |
| C(13)-N(1)-C(3)-C(2)    | -176.71(9)  |
| O(1)-C(2)-C(3)-O(2)     | -158.21(10) |
| C(7)-C(2)-C(3)-O(2)     | 75.30(13)   |
| C(1)-C(2)-C(3)-O(2)     | -46.83(14)  |
| O(1)-C(2)-C(3)-N(1)     | 20.73(14)   |
| C(7)-C(2)-C(3)-N(1)     | -105.75(11) |
| C(1)-C(2)-C(3)-N(1)     | 132.12(11)  |
| C(3)-N(1)-C(4)-C(6)     | -175.82(12) |
| C(13)-N(1)-C(4)-C(6)    | 4.49(17)    |
| C(3)-N(1)-C(4)-C(5)     | 5.73(15)    |
| C(13)-N(1)-C(4)-C(5)    | -173.96(9)  |
| C(2)-O(1)-C(5)-C(4)     | 65.76(12)   |
| C(6)-C(4)-C(5)-O(1)     | 142.33(12)  |
| N(1)-C(4)-C(5)-O(1)     | -39.22(13)  |
| O(1)-C(2)-C(7)-C(12)    | -149.29(11) |
| C(3)-C(2)-C(7)-C(12)    | -23.35(15)  |
| C(1)-C(2)-C(7)-C(12)    | 97.13(13)   |
| O(1)-C(2)-C(7)-C(8)     | 31.23(14)   |
| C(3)-C(2)-C(7)-C(8)     | 157.17(10)  |
| C(1)-C(2)-C(7)-C(8)     | -82.34(13)  |
| C(12)-C(7)-C(8)-C(9)    | 0.64(18)    |
| C(2)-C(7)-C(8)-C(9)     | -179.87(11) |
| C(7)-C(8)-C(9)-C(10)    | -0.3(2)     |
| C(8)-C(9)-C(10)-C(11)   | -0.1(2)     |
| C(9)-C(10)-C(11)-C(12)  | 0.3(2)      |
| C(8)-C(7)-C(12)-C(11)   | -0.46(18)   |
| C(2)-C(7)-C(12)-C(11)   | -179.94(11) |
| C(10)-C(11)-C(12)-C(7)  | -0.01(19)   |
| C(3)-N(1)-C(13)-C(14)   | -109.13(12) |
| C(4)-N(1)-C(13)-C(14)   | 70.58(14)   |
| C(3)-N(1)-C(13)-C(18)   | 68.90(14)   |
| C(4)-N(1)-C(13)-C(18)   | -111.38(12) |
| C(18)-C(13)-C(14)-C(15) | 0.86(18)    |
| N(1)-C(13)-C(14)-C(15)  | 178.86(10)  |
| C(13)-C(14)-C(15)-C(16) | -1.08(18)   |
| C(14)-C(15)-C(16)-F(4)  | -179.63(10) |
| C(14)-C(15)-C(16)-C(17) | 0.20(19)    |
| F(4)-C(16)-C(17)-C(18)  | -179.27(10) |

|                         |             |
|-------------------------|-------------|
| C(15)-C(16)-C(17)-C(18) | 0.91(18)    |
| C(14)-C(13)-C(18)-C(17) | 0.26(17)    |
| N(1)-C(13)-C(18)-C(17)  | -177.75(10) |
| C(16)-C(17)-C(18)-C(13) | -1.12(16)   |

---

Symmetry transformations used to generate equivalent atoms:

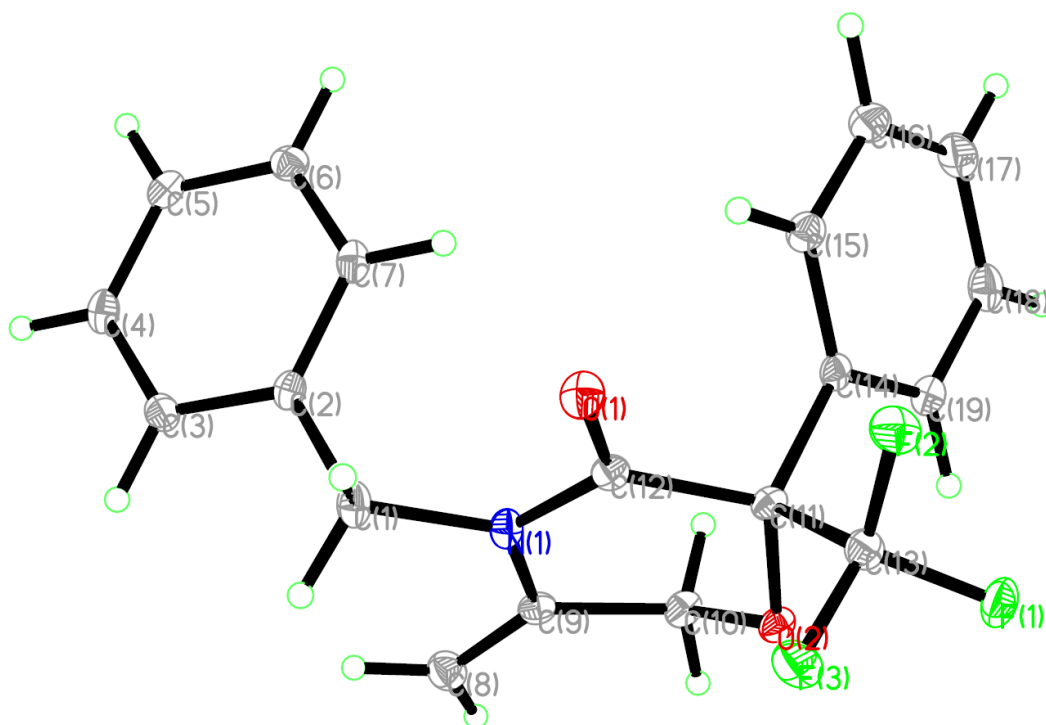

Table 1. Crystal data and structure refinement for 2a.

|                                   |                                                                                                                                     |
|-----------------------------------|-------------------------------------------------------------------------------------------------------------------------------------|
| Identification code               | shelx                                                                                                                               |
| Empirical formula                 | C <sub>19</sub> H <sub>16</sub> F <sub>3</sub> N O <sub>2</sub>                                                                     |
| Formula weight                    | 347.33                                                                                                                              |
| Temperature                       | 113(2) K                                                                                                                            |
| Wavelength                        | 0.71073 Å                                                                                                                           |
| Crystal system, space group       | Triclinic, P-1                                                                                                                      |
| Unit cell dimensions              | a = 10.473(3) Å    alpha = 68.911(9) deg.<br>b = 11.122(2) Å    beta = 89.618(10) deg.<br>c = 14.777(4) Å    gamma = 83.233(9) deg. |
| Volume                            | 1593.7(7) Å <sup>3</sup>                                                                                                            |
| Z, Calculated density             | 4, 1.448 Mg/m <sup>3</sup>                                                                                                          |
| Absorption coefficient            | 0.117 mm <sup>-1</sup>                                                                                                              |
| F(000)                            | 720                                                                                                                                 |
| Crystal size                      | 0.20 x 0.12 x 0.10 mm                                                                                                               |
| Theta range for data collection   | 1.48 to 27.88 deg.                                                                                                                  |
| Limiting indices                  | -13 ≤ h ≤ 13, -12 ≤ k ≤ 14, -19 ≤ l ≤ 19                                                                                            |
| Reflections collected / unique    | 16896 / 7492 [R(int) = 0.0381]                                                                                                      |
| Completeness to theta = 27.88     | 98.4 %                                                                                                                              |
| Absorption correction             | Semi-empirical from equivalents                                                                                                     |
| Max. and min. transmission        | 0.9884 and 0.9769                                                                                                                   |
| Refinement method                 | Full-matrix least-squares on F <sup>2</sup>                                                                                         |
| Data / restraints / parameters    | 7492 / 0 / 451                                                                                                                      |
| Goodness-of-fit on F <sup>2</sup> | 1.071                                                                                                                               |
| Final R indices [I > 2sigma(I)]   | R1 = 0.0401, wR2 = 0.0837                                                                                                           |

R indices (all data) R1 = 0.0622, wR2 = 0.0890  
Largest diff. peak and hole 1.120 and -0.341 e.A<sup>-3</sup>

Table 2. Atomic coordinates (x 10<sup>4</sup>) and equivalent isotropic displacement parameters (A<sup>2</sup> x 10<sup>3</sup>) for 2a.

U(eq) is defined as one third of the trace of the orthogonalized Uij tensor.

|       | x       | y        | z       | U(eq) |
|-------|---------|----------|---------|-------|
| F(1)  | 394(1)  | 9067(1)  | 950(1)  | 29(1) |
| F(2)  | 2434(1) | 8665(1)  | 1242(1) | 28(1) |
| F(3)  | 1419(1) | 7293(1)  | 903(1)  | 29(1) |
| F(4)  | 7068(1) | 1039(1)  | 3858(1) | 30(1) |
| F(5)  | 5014(1) | 1437(1)  | 3890(1) | 34(1) |
| F(6)  | 6225(1) | 2754(1)  | 4109(1) | 35(1) |
| O(1)  | 3197(1) | 6261(1)  | 2676(1) | 25(1) |
| O(2)  | -185(1) | 7132(1)  | 2448(1) | 20(1) |
| O(3)  | 8204(1) | 3100(1)  | 2571(1) | 28(1) |
| O(4)  | 4792(1) | 3553(1)  | 2380(1) | 22(1) |
| N(1)  | 1614(1) | 5088(1)  | 3458(1) | 19(1) |
| N(2)  | 6858(1) | 4870(1)  | 1634(1) | 19(1) |
| C(1)  | 2551(2) | 3904(1)  | 3812(1) | 23(1) |
| C(2)  | 3004(1) | 3533(1)  | 4858(1) | 19(1) |
| C(3)  | 3089(2) | 2247(1)  | 5485(1) | 23(1) |
| C(4)  | 3603(2) | 1867(2)  | 6428(1) | 26(1) |
| C(5)  | 4039(2) | 2780(2)  | 6746(1) | 23(1) |
| C(6)  | 3955(2) | 4067(2)  | 6129(1) | 23(1) |
| C(7)  | 3438(2) | 4440(1)  | 5193(1) | 22(1) |
| C(8)  | -183(2) | 3896(2)  | 4152(1) | 27(1) |
| C(9)  | 308(2)  | 4999(2)  | 3690(1) | 20(1) |
| C(10) | -510(2) | 6284(1)  | 3392(1) | 21(1) |
| C(11) | 1087(1) | 7439(1)  | 2469(1) | 17(1) |
| C(12) | 2067(2) | 6208(1)  | 2875(1) | 19(1) |
| C(13) | 1348(2) | 8115(1)  | 1383(1) | 22(1) |
| C(14) | 1212(2) | 8380(1)  | 3004(1) | 18(1) |
| C(15) | 2398(2) | 8520(1)  | 3347(1) | 24(1) |
| C(16) | 2479(2) | 9409(2)  | 3805(1) | 30(1) |
| C(17) | 1374(2) | 10148(2) | 3921(1) | 31(1) |
| C(18) | 197(2)  | 10027(2) | 3574(1) | 29(1) |
| C(19) | 111(2)  | 9146(1)  | 3109(1) | 22(1) |
| C(20) | 7913(2) | 5680(2)  | 1420(1) | 24(1) |

|       |         |         |          |       |
|-------|---------|---------|----------|-------|
| C(21) | 8247(1) | 6152(1) | 357(1)   | 21(1) |
| C(22) | 8500(2) | 7421(2) | -111(1)  | 28(1) |
| C(23) | 8855(2) | 7852(2) | -1072(1) | 34(1) |
| C(24) | 8961(2) | 7014(2) | -1576(1) | 29(1) |
| C(25) | 8710(2) | 5753(2) | -1116(1) | 26(1) |
| C(26) | 8354(2) | 5318(2) | -157(1)  | 24(1) |
| C(27) | 5303(2) | 6727(1) | 781(1)   | 26(1) |
| C(28) | 5601(2) | 5460(1) | 1267(1)  | 18(1) |
| C(29) | 4624(2) | 4538(1) | 1431(1)  | 22(1) |
| C(30) | 5999(2) | 2779(1) | 2498(1)  | 18(1) |
| C(31) | 7124(2) | 3596(1) | 2241(1)  | 19(1) |
| C(32) | 6088(2) | 1996(2) | 3598(1)  | 25(1) |
| C(33) | 6022(2) | 1842(1) | 1939(1)  | 18(1) |
| C(34) | 7161(2) | 1398(1) | 1601(1)  | 23(1) |
| C(35) | 7146(2) | 518(2)  | 1133(1)  | 28(1) |
| C(36) | 6004(2) | 78(2)   | 1004(1)  | 31(1) |
| C(37) | 4867(2) | 519(2)  | 1334(1)  | 29(1) |
| C(38) | 4877(2) | 1404(1) | 1802(1)  | 24(1) |

Table 3. Bond lengths [Å] and angles [deg] for 2a.

|            |            |
|------------|------------|
| F(1)-C(13) | 1.3417(17) |
| F(2)-C(13) | 1.3341(17) |
| F(3)-C(13) | 1.3396(15) |
| F(4)-C(32) | 1.3363(18) |
| F(5)-C(32) | 1.3420(18) |
| F(6)-C(32) | 1.3374(16) |
| O(1)-C(12) | 1.2214(18) |
| O(2)-C(11) | 1.4169(17) |
| O(2)-C(10) | 1.4405(16) |
| O(3)-C(31) | 1.2198(18) |
| O(4)-C(30) | 1.4170(17) |
| O(4)-C(29) | 1.4318(17) |
| N(1)-C(12) | 1.3710(18) |
| N(1)-C(9)  | 1.4135(19) |
| N(1)-C(1)  | 1.4758(18) |
| N(2)-C(31) | 1.3731(18) |
| N(2)-C(28) | 1.4168(19) |
| N(2)-C(20) | 1.4690(18) |
| C(1)-C(2)  | 1.513(2)   |
| C(1)-H(1A) | 0.9900     |

|              |            |
|--------------|------------|
| C(1)-H(1B)   | 0.9900     |
| C(2)-C(3)    | 1.389(2)   |
| C(2)-C(7)    | 1.3929(19) |
| C(3)-C(4)    | 1.394(2)   |
| C(3)-H(3)    | 0.9500     |
| C(4)-C(5)    | 1.384(2)   |
| C(4)-H(4)    | 0.9500     |
| C(5)-C(6)    | 1.385(2)   |
| C(5)-H(5)    | 0.9500     |
| C(6)-C(7)    | 1.386(2)   |
| C(6)-H(6)    | 0.9500     |
| C(7)-H(7)    | 0.9500     |
| C(8)-C(9)    | 1.334(2)   |
| C(8)-H(8A)   | 0.9500     |
| C(8)-H(8B)   | 0.9500     |
| C(9)-C(10)   | 1.494(2)   |
| C(10)-H(10A) | 0.9900     |
| C(10)-H(10B) | 0.9900     |
| C(11)-C(14)  | 1.5385(19) |
| C(11)-C(12)  | 1.541(2)   |
| C(11)-C(13)  | 1.5451(19) |
| C(14)-C(15)  | 1.390(2)   |
| C(14)-C(19)  | 1.393(2)   |
| C(15)-C(16)  | 1.395(2)   |
| C(15)-H(15)  | 0.9500     |
| C(16)-C(17)  | 1.385(2)   |
| C(16)-H(16)  | 0.9500     |
| C(17)-C(18)  | 1.378(2)   |
| C(17)-H(17)  | 0.9500     |
| C(18)-C(19)  | 1.394(2)   |
| C(18)-H(18)  | 0.9500     |
| C(19)-H(19)  | 0.9500     |
| C(20)-C(21)  | 1.519(2)   |
| C(20)-H(20A) | 0.9900     |
| C(20)-H(20B) | 0.9900     |
| C(21)-C(22)  | 1.387(2)   |
| C(21)-C(26)  | 1.3888(19) |
| C(22)-C(23)  | 1.390(2)   |
| C(22)-H(22)  | 0.9500     |
| C(23)-C(24)  | 1.382(2)   |
| C(23)-H(23)  | 0.9500     |
| C(24)-C(25)  | 1.377(2)   |
| C(24)-H(24)  | 0.9500     |

|                  |            |
|------------------|------------|
| C(25)-C(26)      | 1.388(2)   |
| C(25)-H(25)      | 0.9500     |
| C(26)-H(26)      | 0.9500     |
| C(27)-C(28)      | 1.330(2)   |
| C(27)-H(27A)     | 0.9500     |
| C(27)-H(27B)     | 0.9500     |
| C(28)-C(29)      | 1.491(2)   |
| C(29)-H(29A)     | 0.9900     |
| C(29)-H(29B)     | 0.9900     |
| C(30)-C(31)      | 1.535(2)   |
| C(30)-C(32)      | 1.541(2)   |
| C(30)-C(33)      | 1.5435(18) |
| C(33)-C(38)      | 1.389(2)   |
| C(33)-C(34)      | 1.395(2)   |
| C(34)-C(35)      | 1.3883(19) |
| C(34)-H(34)      | 0.9500     |
| C(35)-C(36)      | 1.383(2)   |
| C(35)-H(35)      | 0.9500     |
| C(36)-C(37)      | 1.386(2)   |
| C(36)-H(36)      | 0.9500     |
| C(37)-C(38)      | 1.392(2)   |
| C(37)-H(37)      | 0.9500     |
| C(38)-H(38)      | 0.9500     |
| C(11)-O(2)-C(10) | 110.71(10) |
| C(30)-O(4)-C(29) | 111.30(11) |
| C(12)-N(1)-C(9)  | 123.84(13) |
| C(12)-N(1)-C(1)  | 116.93(13) |
| C(9)-N(1)-C(1)   | 119.14(13) |
| C(31)-N(2)-C(28) | 123.12(13) |
| C(31)-N(2)-C(20) | 118.04(13) |
| C(28)-N(2)-C(20) | 118.67(12) |
| N(1)-C(1)-C(2)   | 113.71(11) |
| N(1)-C(1)-H(1A)  | 108.8      |
| C(2)-C(1)-H(1A)  | 108.8      |
| N(1)-C(1)-H(1B)  | 108.8      |
| C(2)-C(1)-H(1B)  | 108.8      |
| H(1A)-C(1)-H(1B) | 107.7      |
| C(3)-C(2)-C(7)   | 118.54(13) |
| C(3)-C(2)-C(1)   | 120.03(13) |
| C(7)-C(2)-C(1)   | 121.23(13) |
| C(2)-C(3)-C(4)   | 120.91(14) |
| C(2)-C(3)-H(3)   | 119.5      |
| C(4)-C(3)-H(3)   | 119.5      |



|                     |            |
|---------------------|------------|
| C(5)-C(4)-C(3)      | 119.76(14) |
| C(5)-C(4)-H(4)      | 120.1      |
| C(3)-C(4)-H(4)      | 120.1      |
| C(4)-C(5)-C(6)      | 119.90(14) |
| C(4)-C(5)-H(5)      | 120.1      |
| C(6)-C(5)-H(5)      | 120.1      |
| C(5)-C(6)-C(7)      | 120.08(14) |
| C(5)-C(6)-H(6)      | 120.0      |
| C(7)-C(6)-H(6)      | 120.0      |
| C(6)-C(7)-C(2)      | 120.80(14) |
| C(6)-C(7)-H(7)      | 119.6      |
| C(2)-C(7)-H(7)      | 119.6      |
| C(9)-C(8)-H(8A)     | 120.0      |
| C(9)-C(8)-H(8B)     | 120.0      |
| H(8A)-C(8)-H(8B)    | 120.0      |
| C(8)-C(9)-N(1)      | 124.96(15) |
| C(8)-C(9)-C(10)     | 121.19(15) |
| N(1)-C(9)-C(10)     | 113.83(13) |
| O(2)-C(10)-C(9)     | 111.00(12) |
| O(2)-C(10)-H(10A)   | 109.4      |
| C(9)-C(10)-H(10A)   | 109.4      |
| O(2)-C(10)-H(10B)   | 109.4      |
| C(9)-C(10)-H(10B)   | 109.4      |
| H(10A)-C(10)-H(10B) | 108.0      |
| O(2)-C(11)-C(14)    | 112.71(12) |
| O(2)-C(11)-C(12)    | 111.68(12) |
| C(14)-C(11)-C(12)   | 111.71(12) |
| O(2)-C(11)-C(13)    | 103.16(11) |
| C(14)-C(11)-C(13)   | 109.44(11) |
| C(12)-C(11)-C(13)   | 107.65(11) |
| O(1)-C(12)-N(1)     | 122.80(14) |
| O(1)-C(12)-C(11)    | 119.76(14) |
| N(1)-C(12)-C(11)    | 117.44(13) |
| F(2)-C(13)-F(3)     | 107.45(12) |
| F(2)-C(13)-F(1)     | 106.53(12) |
| F(3)-C(13)-F(1)     | 107.04(12) |
| F(2)-C(13)-C(11)    | 112.97(12) |
| F(3)-C(13)-C(11)    | 112.19(12) |
| F(1)-C(13)-C(11)    | 110.31(12) |
| C(15)-C(14)-C(19)   | 119.56(14) |
| C(15)-C(14)-C(11)   | 121.69(13) |
| C(19)-C(14)-C(11)   | 118.69(14) |
| C(14)-C(15)-C(16)   | 120.10(15) |

|                     |            |
|---------------------|------------|
| C(14)-C(15)-H(15)   | 119.9      |
| C(16)-C(15)-H(15)   | 119.9      |
| C(17)-C(16)-C(15)   | 119.79(16) |
| C(17)-C(16)-H(16)   | 120.1      |
| C(15)-C(16)-H(16)   | 120.1      |
| C(18)-C(17)-C(16)   | 120.51(15) |
| C(18)-C(17)-H(17)   | 119.7      |
| C(16)-C(17)-H(17)   | 119.7      |
| C(17)-C(18)-C(19)   | 119.96(16) |
| C(17)-C(18)-H(18)   | 120.0      |
| C(19)-C(18)-H(18)   | 120.0      |
| C(14)-C(19)-C(18)   | 120.06(16) |
| C(14)-C(19)-H(19)   | 120.0      |
| C(18)-C(19)-H(19)   | 120.0      |
| N(2)-C(20)-C(21)    | 113.23(11) |
| N(2)-C(20)-H(20A)   | 108.9      |
| C(21)-C(20)-H(20A)  | 108.9      |
| N(2)-C(20)-H(20B)   | 108.9      |
| C(21)-C(20)-H(20B)  | 108.9      |
| H(20A)-C(20)-H(20B) | 107.7      |
| C(22)-C(21)-C(26)   | 118.60(14) |
| C(22)-C(21)-C(20)   | 120.22(13) |
| C(26)-C(21)-C(20)   | 121.13(13) |
| C(21)-C(22)-C(23)   | 120.87(14) |
| C(21)-C(22)-H(22)   | 119.6      |
| C(23)-C(22)-H(22)   | 119.6      |
| C(24)-C(23)-C(22)   | 120.05(15) |
| C(24)-C(23)-H(23)   | 120.0      |
| C(22)-C(23)-H(23)   | 120.0      |
| C(25)-C(24)-C(23)   | 119.40(15) |
| C(25)-C(24)-H(24)   | 120.3      |
| C(23)-C(24)-H(24)   | 120.3      |
| C(24)-C(25)-C(26)   | 120.74(14) |
| C(24)-C(25)-H(25)   | 119.6      |
| C(26)-C(25)-H(25)   | 119.6      |
| C(25)-C(26)-C(21)   | 120.34(15) |
| C(25)-C(26)-H(26)   | 119.8      |
| C(21)-C(26)-H(26)   | 119.8      |
| C(28)-C(27)-H(27A)  | 120.0      |
| C(28)-C(27)-H(27B)  | 120.0      |
| H(27A)-C(27)-H(27B) | 120.0      |
| C(27)-C(28)-N(2)    | 123.72(15) |
| C(27)-C(28)-C(29)   | 121.59(15) |

|                     |            |
|---------------------|------------|
| N(2)-C(28)-C(29)    | 114.64(12) |
| O(4)-C(29)-C(28)    | 111.24(12) |
| O(4)-C(29)-H(29A)   | 109.4      |
| C(28)-C(29)-H(29A)  | 109.4      |
| O(4)-C(29)-H(29B)   | 109.4      |
| C(28)-C(29)-H(29B)  | 109.4      |
| H(29A)-C(29)-H(29B) | 108.0      |
| O(4)-C(30)-C(31)    | 112.43(12) |
| O(4)-C(30)-C(32)    | 102.35(11) |
| C(31)-C(30)-C(32)   | 108.45(12) |
| O(4)-C(30)-C(33)    | 111.76(12) |
| C(31)-C(30)-C(33)   | 111.80(12) |
| C(32)-C(30)-C(33)   | 109.56(11) |
| O(3)-C(31)-N(2)     | 122.86(14) |
| O(3)-C(31)-C(30)    | 119.64(13) |
| N(2)-C(31)-C(30)    | 117.50(13) |
| F(4)-C(32)-F(6)     | 107.69(13) |
| F(4)-C(32)-F(5)     | 106.62(12) |
| F(6)-C(32)-F(5)     | 107.03(12) |
| F(4)-C(32)-C(30)    | 112.80(12) |
| F(6)-C(32)-C(30)    | 111.60(12) |
| F(5)-C(32)-C(30)    | 110.80(13) |
| C(38)-C(33)-C(34)   | 119.72(13) |
| C(38)-C(33)-C(30)   | 118.39(13) |
| C(34)-C(33)-C(30)   | 121.86(14) |
| C(35)-C(34)-C(33)   | 119.95(15) |
| C(35)-C(34)-H(34)   | 120.0      |
| C(33)-C(34)-H(34)   | 120.0      |
| C(36)-C(35)-C(34)   | 120.08(16) |
| C(36)-C(35)-H(35)   | 120.0      |
| C(34)-C(35)-H(35)   | 120.0      |
| C(35)-C(36)-C(37)   | 120.35(15) |
| C(35)-C(36)-H(36)   | 119.8      |
| C(37)-C(36)-H(36)   | 119.8      |
| C(36)-C(37)-C(38)   | 119.80(16) |
| C(36)-C(37)-H(37)   | 120.1      |
| C(38)-C(37)-H(37)   | 120.1      |
| C(33)-C(38)-C(37)   | 120.10(15) |
| C(33)-C(38)-H(38)   | 119.9      |
| C(37)-C(38)-H(38)   | 119.9      |

---

Symmetry transformations used to generate equivalent atoms:

Table 4. Anisotropic displacement parameters ( $\text{\AA}^2 \times 10^3$ ) for 2a.

The anisotropic displacement factor exponent takes the form:

$$-2\pi^2 [h^2 a^{*2} U_{11} + \dots + 2hk a^* b^* U_{12}]$$

|       | U11   | U22   | U33   | U23    | U13   | U12    |
|-------|-------|-------|-------|--------|-------|--------|
| F(1)  | 34(1) | 24(1) | 21(1) | 0(1)   | -4(1) | 1(1)   |
| F(2)  | 30(1) | 31(1) | 23(1) | -7(1)  | 8(1)  | -13(1) |
| F(3)  | 44(1) | 28(1) | 20(1) | -12(1) | 6(1)  | -9(1)  |
| F(4)  | 39(1) | 22(1) | 23(1) | -4(1)  | -4(1) | 5(1)   |
| F(5)  | 40(1) | 32(1) | 26(1) | -4(1)  | 13(1) | -8(1)  |
| F(6)  | 59(1) | 27(1) | 21(1) | -12(1) | 0(1)  | -1(1)  |
| O(1)  | 18(1) | 28(1) | 29(1) | -9(1)  | 6(1)  | -2(1)  |
| O(2)  | 18(1) | 22(1) | 16(1) | -3(1)  | 0(1)  | -5(1)  |
| O(3)  | 22(1) | 26(1) | 35(1) | -8(1)  | -7(1) | 0(1)   |
| O(4)  | 20(1) | 21(1) | 21(1) | -4(1)  | 5(1)  | 1(1)   |
| N(1)  | 22(1) | 18(1) | 17(1) | -5(1)  | 2(1)  | 1(1)   |
| N(2)  | 18(1) | 17(1) | 19(1) | -5(1)  | 0(1)  | -3(1)  |
| C(1)  | 28(1) | 20(1) | 19(1) | -6(1)  | 3(1)  | 3(1)   |
| C(2)  | 17(1) | 20(1) | 18(1) | -5(1)  | 3(1)  | 1(1)   |
| C(3)  | 26(1) | 19(1) | 24(1) | -9(1)  | 1(1)  | -2(1)  |
| C(4)  | 29(1) | 20(1) | 23(1) | -2(1)  | -1(1) | 3(1)   |
| C(5)  | 19(1) | 27(1) | 21(1) | -6(1)  | -1(1) | 0(1)   |
| C(6)  | 18(1) | 26(1) | 27(1) | -11(1) | 2(1)  | -4(1)  |
| C(7)  | 19(1) | 18(1) | 23(1) | -3(1)  | 6(1)  | -1(1)  |
| C(8)  | 32(1) | 25(1) | 26(1) | -9(1)  | 2(1)  | -6(1)  |
| C(9)  | 21(1) | 24(1) | 15(1) | -8(1)  | 1(1)  | -4(1)  |
| C(10) | 19(1) | 25(1) | 17(1) | -3(1)  | 3(1)  | -5(1)  |
| C(11) | 15(1) | 21(1) | 16(1) | -6(1)  | 1(1)  | -3(1)  |
| C(12) | 21(1) | 22(1) | 14(1) | -8(1)  | 1(1)  | -2(1)  |
| C(13) | 24(1) | 21(1) | 19(1) | -7(1)  | 2(1)  | -4(1)  |
| C(14) | 22(1) | 17(1) | 12(1) | -2(1)  | 1(1)  | -2(1)  |
| C(15) | 25(1) | 25(1) | 20(1) | -8(1)  | -1(1) | -1(1)  |
| C(16) | 36(1) | 29(1) | 23(1) | -7(1)  | -6(1) | -7(1)  |
| C(17) | 50(1) | 25(1) | 22(1) | -12(1) | -1(1) | -4(1)  |
| C(18) | 36(1) | 21(1) | 27(1) | -8(1)  | 3(1)  | 3(1)   |
| C(19) | 22(1) | 22(1) | 20(1) | -5(1)  | 1(1)  | 0(1)   |
| C(20) | 25(1) | 23(1) | 26(1) | -10(1) | -2(1) | -8(1)  |
| C(21) | 15(1) | 23(1) | 23(1) | -6(1)  | -1(1) | -4(1)  |
| C(22) | 29(1) | 23(1) | 33(1) | -11(1) | 4(1)  | -8(1)  |
| C(23) | 36(1) | 23(1) | 38(1) | -3(1)  | 8(1)  | -9(1)  |
| C(24) | 23(1) | 35(1) | 23(1) | -4(1)  | 2(1)  | -4(1)  |
| C(25) | 24(1) | 30(1) | 26(1) | -12(1) | 1(1)  | -5(1)  |

|       |       |       |       |       |       |       |
|-------|-------|-------|-------|-------|-------|-------|
| C(26) | 23(1) | 21(1) | 25(1) | -6(1) | -2(1) | -5(1) |
| C(27) | 27(1) | 23(1) | 25(1) | -6(1) | 2(1)  | 0(1)  |
| C(28) | 20(1) | 21(1) | 15(1) | -8(1) | 2(1)  | 0(1)  |
| C(29) | 20(1) | 23(1) | 19(1) | -5(1) | -1(1) | 2(1)  |
| C(30) | 18(1) | 18(1) | 17(1) | -5(1) | 1(1)  | 1(1)  |
| C(31) | 20(1) | 21(1) | 17(1) | -9(1) | -1(1) | -1(1) |
| C(32) | 32(1) | 21(1) | 22(1) | -9(1) | 3(1)  | -2(1) |
| C(33) | 23(1) | 15(1) | 13(1) | -2(1) | 0(1)  | -2(1) |
| C(34) | 24(1) | 23(1) | 19(1) | -7(1) | 2(1)  | -1(1) |
| C(35) | 39(1) | 24(1) | 19(1) | -7(1) | 1(1)  | 5(1)  |
| C(36) | 56(1) | 19(1) | 19(1) | -7(1) | -6(1) | 0(1)  |
| C(37) | 39(1) | 22(1) | 24(1) | -3(1) | -9(1) | -9(1) |
| C(38) | 26(1) | 22(1) | 20(1) | -3(1) | -1(1) | -3(1) |

Table 5. Hydrogen coordinates ( $\times 10^4$ ) and isotropic displacement parameters ( $\text{\AA}^2 \times 10^3$ ) for 2a.

|        | x     | y     | z     | U(eq) |
|--------|-------|-------|-------|-------|
| H(1A)  | 3307  | 4038  | 3397  | 28    |
| H(1B)  | 2154  | 3174  | 3744  | 28    |
| H(3)   | 2792  | 1618  | 5268  | 27    |
| H(4)   | 3654  | 985   | 6850  | 31    |
| H(5)   | 4396  | 2524  | 7387  | 28    |
| H(6)   | 4251  | 4694  | 6348  | 28    |
| H(7)   | 3378  | 5325  | 4776  | 26    |
| H(8A)  | 357   | 3090  | 4351  | 33    |
| H(8B)  | -1074 | 3916  | 4281  | 33    |
| H(10A) | -1427 | 6152  | 3379  | 26    |
| H(10B) | -386  | 6693  | 3875  | 26    |
| H(15)  | 3153  | 8008  | 3270  | 29    |
| H(16)  | 3289  | 9507  | 4037  | 36    |
| H(17)  | 1428  | 10743 | 4243  | 38    |
| H(18)  | -555  | 10543 | 3651  | 35    |
| H(19)  | -699  | 9069  | 2864  | 27    |
| H(20A) | 8687  | 5173  | 1818  | 29    |
| H(20B) | 7669  | 6442  | 1609  | 29    |
| H(22)  | 8429  | 8003  | 230   | 33    |
| H(23)  | 9026  | 8724  | -1383 | 40    |
| H(24)  | 9204  | 7305  | -2233 | 35    |
| H(25)  | 8782  | 5174  | -1460 | 31    |
| H(26)  | 8182  | 4446  | 150   | 28    |

|        |      |      |      |    |
|--------|------|------|------|----|
| H(27A) | 5950 | 7290 | 663  | 31 |
| H(27B) | 4442 | 7068 | 552  | 31 |
| H(29A) | 3751 | 5022 | 1356 | 26 |
| H(29B) | 4702 | 4126 | 938  | 26 |
| H(34)  | 7946 | 1698 | 1690 | 27 |
| H(35)  | 7920 | 217  | 901  | 34 |
| H(36)  | 5998 | -530 | 688  | 38 |
| H(37)  | 4084 | 219  | 1241 | 35 |
| H(38)  | 4099 | 1708 | 2028 | 29 |

Table 6. Torsion angles [deg] for 2a.

|                        |             |
|------------------------|-------------|
| C(12)-N(1)-C(1)-C(2)   | 102.79(15)  |
| C(9)-N(1)-C(1)-C(2)    | -80.54(17)  |
| N(1)-C(1)-C(2)-C(3)    | 135.62(15)  |
| N(1)-C(1)-C(2)-C(7)    | -49.4(2)    |
| C(7)-C(2)-C(3)-C(4)    | -0.4(2)     |
| C(1)-C(2)-C(3)-C(4)    | 174.68(14)  |
| C(2)-C(3)-C(4)-C(5)    | -0.1(2)     |
| C(3)-C(4)-C(5)-C(6)    | 0.4(2)      |
| C(4)-C(5)-C(6)-C(7)    | -0.2(2)     |
| C(5)-C(6)-C(7)-C(2)    | -0.4(2)     |
| C(3)-C(2)-C(7)-C(6)    | 0.7(2)      |
| C(1)-C(2)-C(7)-C(6)    | -174.37(14) |
| C(12)-N(1)-C(9)-C(8)   | 171.14(13)  |
| C(1)-N(1)-C(9)-C(8)    | -5.3(2)     |
| C(12)-N(1)-C(9)-C(10)  | -10.54(19)  |
| C(1)-N(1)-C(9)-C(10)   | 173.05(11)  |
| C(11)-O(2)-C(10)-C(9)  | -64.80(15)  |
| C(8)-C(9)-C(10)-O(2)   | -140.35(13) |
| N(1)-C(9)-C(10)-O(2)   | 41.25(17)   |
| C(10)-O(2)-C(11)-C(14) | -72.52(14)  |
| C(10)-O(2)-C(11)-C(12) | 54.21(14)   |
| C(10)-O(2)-C(11)-C(13) | 169.55(10)  |
| C(9)-N(1)-C(12)-O(1)   | -179.26(13) |
| C(1)-N(1)-C(12)-O(1)   | -2.8(2)     |
| C(9)-N(1)-C(12)-C(11)  | 1.21(19)    |
| C(1)-N(1)-C(12)-C(11)  | 177.71(11)  |
| O(2)-C(11)-C(12)-O(1)  | 157.60(12)  |
| C(14)-C(11)-C(12)-O(1) | -75.13(16)  |
| C(13)-C(11)-C(12)-O(1) | 45.04(18)   |

|                         |             |
|-------------------------|-------------|
| O(2)-C(11)-C(12)-N(1)   | -22.86(16)  |
| C(14)-C(11)-C(12)-N(1)  | 104.41(15)  |
| C(13)-C(11)-C(12)-N(1)  | -135.42(12) |
| O(2)-C(11)-C(13)-F(2)   | 170.40(11)  |
| C(14)-C(11)-C(13)-F(2)  | 50.20(16)   |
| C(12)-C(11)-C(13)-F(2)  | -71.40(15)  |
| O(2)-C(11)-C(13)-F(3)   | -67.95(14)  |
| C(14)-C(11)-C(13)-F(3)  | 171.85(13)  |
| C(12)-C(11)-C(13)-F(3)  | 50.25(16)   |
| O(2)-C(11)-C(13)-F(1)   | 51.30(14)   |
| C(14)-C(11)-C(13)-F(1)  | -68.90(15)  |
| C(12)-C(11)-C(13)-F(1)  | 169.50(12)  |
| O(2)-C(11)-C(14)-C(15)  | 161.42(13)  |
| C(12)-C(11)-C(14)-C(15) | 34.71(19)   |
| C(13)-C(11)-C(14)-C(15) | -84.41(16)  |
| O(2)-C(11)-C(14)-C(19)  | -21.21(18)  |
| C(12)-C(11)-C(14)-C(19) | -147.92(13) |
| C(13)-C(11)-C(14)-C(19) | 92.96(16)   |
| C(19)-C(14)-C(15)-C(16) | 0.9(2)      |
| C(11)-C(14)-C(15)-C(16) | 178.20(13)  |
| C(14)-C(15)-C(16)-C(17) | 0.3(2)      |
| C(15)-C(16)-C(17)-C(18) | -1.0(2)     |
| C(16)-C(17)-C(18)-C(19) | 0.6(2)      |
| C(15)-C(14)-C(19)-C(18) | -1.3(2)     |
| C(11)-C(14)-C(19)-C(18) | -178.74(13) |
| C(17)-C(18)-C(19)-C(14) | 0.6(2)      |
| C(31)-N(2)-C(20)-C(21)  | 115.90(14)  |
| C(28)-N(2)-C(20)-C(21)  | -68.75(16)  |
| N(2)-C(20)-C(21)-C(22)  | 137.85(15)  |
| N(2)-C(20)-C(21)-C(26)  | -44.6(2)    |
| C(26)-C(21)-C(22)-C(23) | -0.2(2)     |
| C(20)-C(21)-C(22)-C(23) | 177.45(15)  |
| C(21)-C(22)-C(23)-C(24) | 0.0(3)      |
| C(22)-C(23)-C(24)-C(25) | 0.0(3)      |
| C(23)-C(24)-C(25)-C(26) | 0.0(2)      |
| C(24)-C(25)-C(26)-C(21) | -0.1(2)     |
| C(22)-C(21)-C(26)-C(25) | 0.2(2)      |
| C(20)-C(21)-C(26)-C(25) | -177.39(14) |
| C(31)-N(2)-C(28)-C(27)  | 171.23(13)  |
| C(20)-N(2)-C(28)-C(27)  | -3.87(19)   |
| C(31)-N(2)-C(28)-C(29)  | -11.14(18)  |
| C(20)-N(2)-C(28)-C(29)  | 173.76(11)  |
| C(30)-O(4)-C(29)-C(28)  | -62.97(14)  |

|                         |             |
|-------------------------|-------------|
| C(27)-C(28)-C(29)-O(4)  | -141.56(13) |
| N(2)-C(28)-C(29)-O(4)   | 40.75(16)   |
| C(29)-O(4)-C(30)-C(31)  | 52.93(14)   |
| C(29)-O(4)-C(30)-C(32)  | 169.09(11)  |
| C(29)-O(4)-C(30)-C(33)  | -73.76(14)  |
| C(28)-N(2)-C(31)-O(3)   | -178.39(13) |
| C(20)-N(2)-C(31)-O(3)   | -3.3(2)     |
| C(28)-N(2)-C(31)-C(30)  | 1.94(19)    |
| C(20)-N(2)-C(31)-C(30)  | 177.06(11)  |
| O(4)-C(30)-C(31)-O(3)   | 157.79(12)  |
| C(32)-C(30)-C(31)-O(3)  | 45.35(17)   |
| C(33)-C(30)-C(31)-O(3)  | -75.56(16)  |
| O(4)-C(30)-C(31)-N(2)   | -22.53(17)  |
| C(32)-C(30)-C(31)-N(2)  | -134.97(13) |
| C(33)-C(30)-C(31)-N(2)  | 104.12(14)  |
| O(4)-C(30)-C(32)-F(4)   | 169.93(12)  |
| C(31)-C(30)-C(32)-F(4)  | -71.07(15)  |
| C(33)-C(30)-C(32)-F(4)  | 51.21(17)   |
| O(4)-C(30)-C(32)-F(6)   | -68.68(15)  |
| C(31)-C(30)-C(32)-F(6)  | 50.32(17)   |
| C(33)-C(30)-C(32)-F(6)  | 172.60(13)  |
| O(4)-C(30)-C(32)-F(5)   | 50.48(14)   |
| C(31)-C(30)-C(32)-F(5)  | 169.48(11)  |
| C(33)-C(30)-C(32)-F(5)  | -68.23(16)  |
| O(4)-C(30)-C(33)-C(38)  | -29.43(17)  |
| C(31)-C(30)-C(33)-C(38) | -156.45(13) |
| C(32)-C(30)-C(33)-C(38) | 83.29(16)   |
| O(4)-C(30)-C(33)-C(34)  | 152.64(13)  |
| C(31)-C(30)-C(33)-C(34) | 25.61(19)   |
| C(32)-C(30)-C(33)-C(34) | -94.65(16)  |
| C(38)-C(33)-C(34)-C(35) | -0.3(2)     |
| C(30)-C(33)-C(34)-C(35) | 177.62(13)  |
| C(33)-C(34)-C(35)-C(36) | -0.2(2)     |
| C(34)-C(35)-C(36)-C(37) | 0.5(2)      |
| C(35)-C(36)-C(37)-C(38) | -0.4(2)     |
| C(34)-C(33)-C(38)-C(37) | 0.4(2)      |
| C(30)-C(33)-C(38)-C(37) | -177.57(13) |
| C(36)-C(37)-C(38)-C(33) | -0.1(2)     |

---

Symmetry transformations used to generate equivalent atoms:
